# Supplementary material for: Intrinsic reactivity of a uranium metallacyclopropene toward unsaturated organic molecules
Source: Royal Society of Chemistry journal article supplement (doi:10.1039/c6dt03005j), 2016-01-01
Supplement: c6dt03005j1.pdf [file c6dt03005j1.pdf]

*Supporting Information for*

# Intrinsic reactivity of a uranium metallacyclopropene toward unsaturated organic molecules

Lei Zhang,<sup>a</sup> Bo Fang,<sup>a</sup> Guohua Hou,<sup>a</sup> Lin Ai,<sup>a</sup> Wanjian Ding,<sup>\*a</sup> Marc D. Walter<sup>\*b</sup> and Guofu Zi<sup>\*a</sup>

<sup>a</sup>Department of Chemistry, Beijing Normal University, Beijing 100875, China

<sup>b</sup>Institut für Anorganische und Analytische Chemie, Technische Universität Braunschweig, Hagenring  
30, 38106 Braunschweig, Germany

## Table of Content

|                                  |           |
|----------------------------------|-----------|
| <b>1. Figures</b>                | <b>S2</b> |
| <b>2. Additional experiments</b> | <b>S5</b> |
| <b>3. Crystal parameters</b>     | <b>S7</b> |
| <b>4. Computational details</b>  | <b>S9</b> |

# 1. Figures

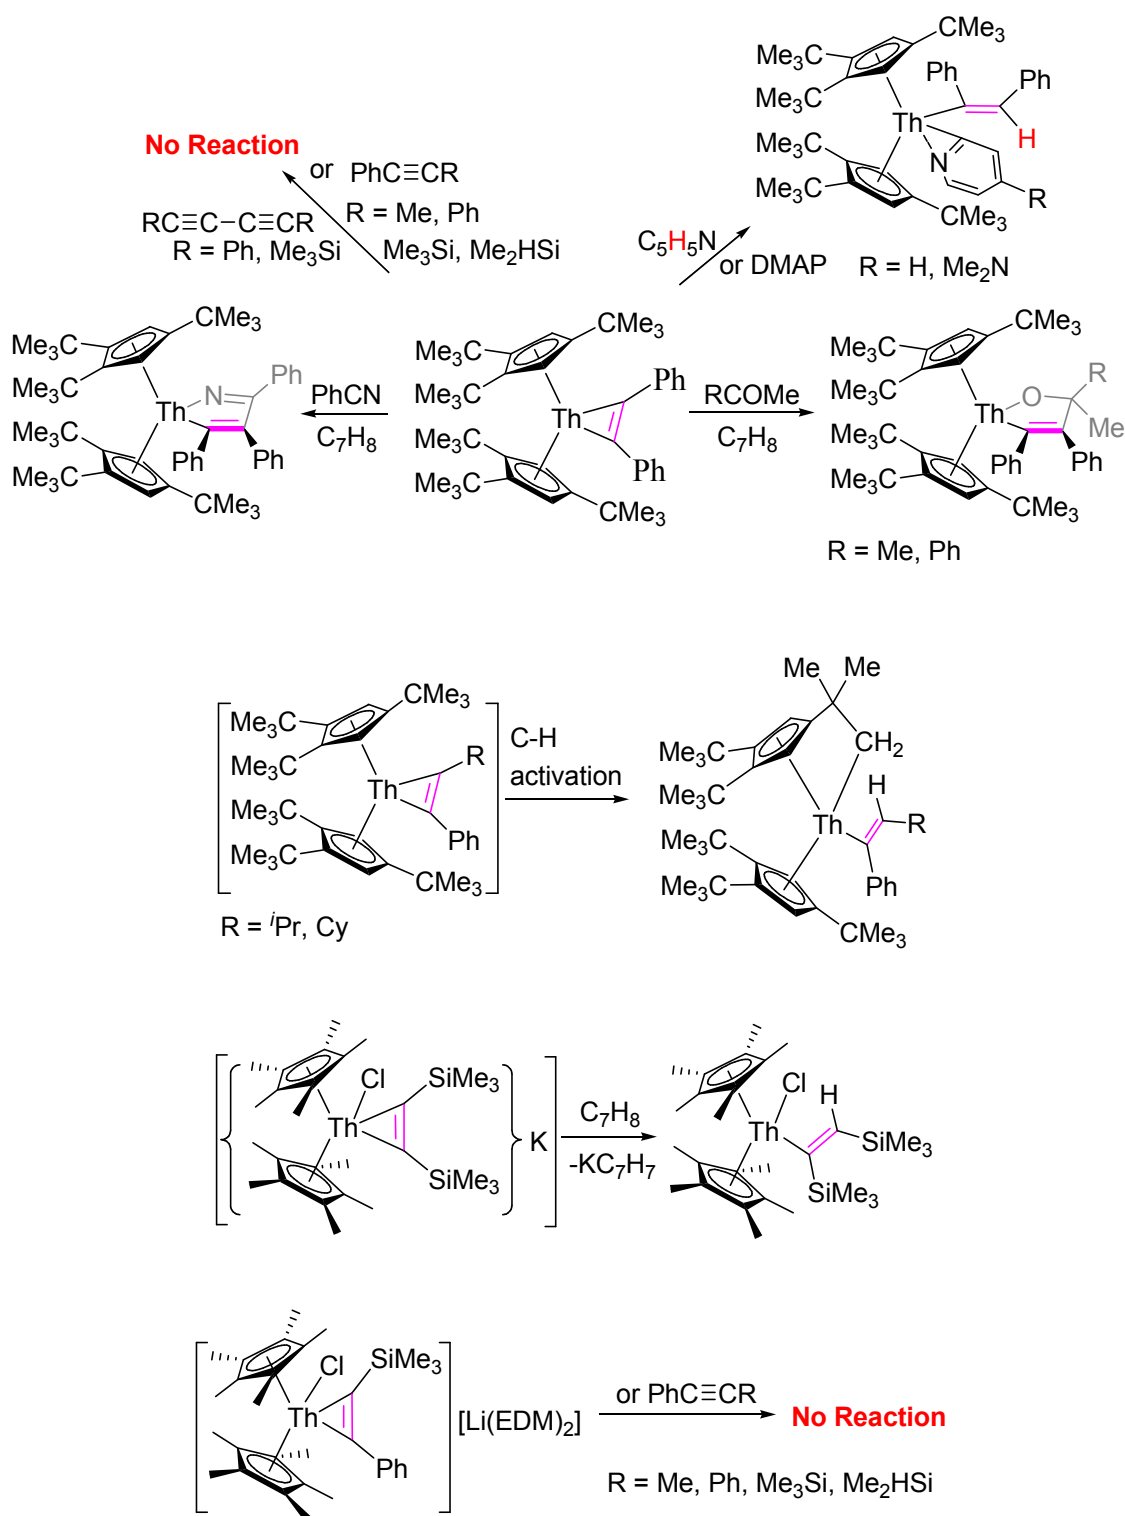

**Figure S1.** Selected reactivity of thorium metallacycloprenes.

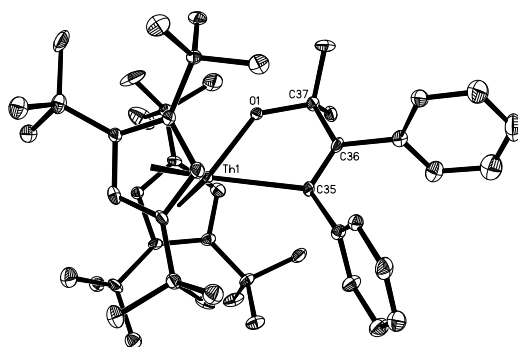

**Figure S2.** Molecular structure of **15** (thermal ellipsoids drawn at the 35% probability level). Selected bond lengths (Å) and angles (°): Th-C(Cp) (av.) 2.880(14), Th-C(Cp) (range) 2.795(13) to 3.001(14), Th-Cp (cent) (av.) 2.619(12), Th-O(1) 2.087(8), Th-C(35) 2.603(11), Cp(cent)-Th-Cp(cent) 131.9(4), O(1)-Th-C(35) 66.7(4).

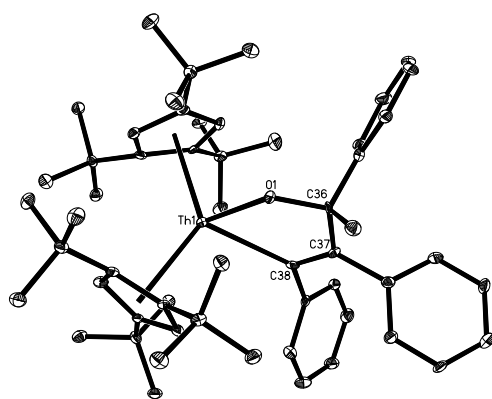

**Figure S3.** Molecular structure of **16** (thermal ellipsoids drawn at the 35% probability level). Selected bond lengths (Å) and angles (°): Th-C(Cp) (av.) 2.910(6), Th-C(Cp) (range) 2.815(5) to 3.050(6), Th-Cp (cent) (av.) 2.646(5), Th-O(1) 2.121(4), Th-C(38) 2.624(6), Cp(cent)-Th-Cp(cent) 129.3(2), O(1)-Th-C(38) 66.8(2).

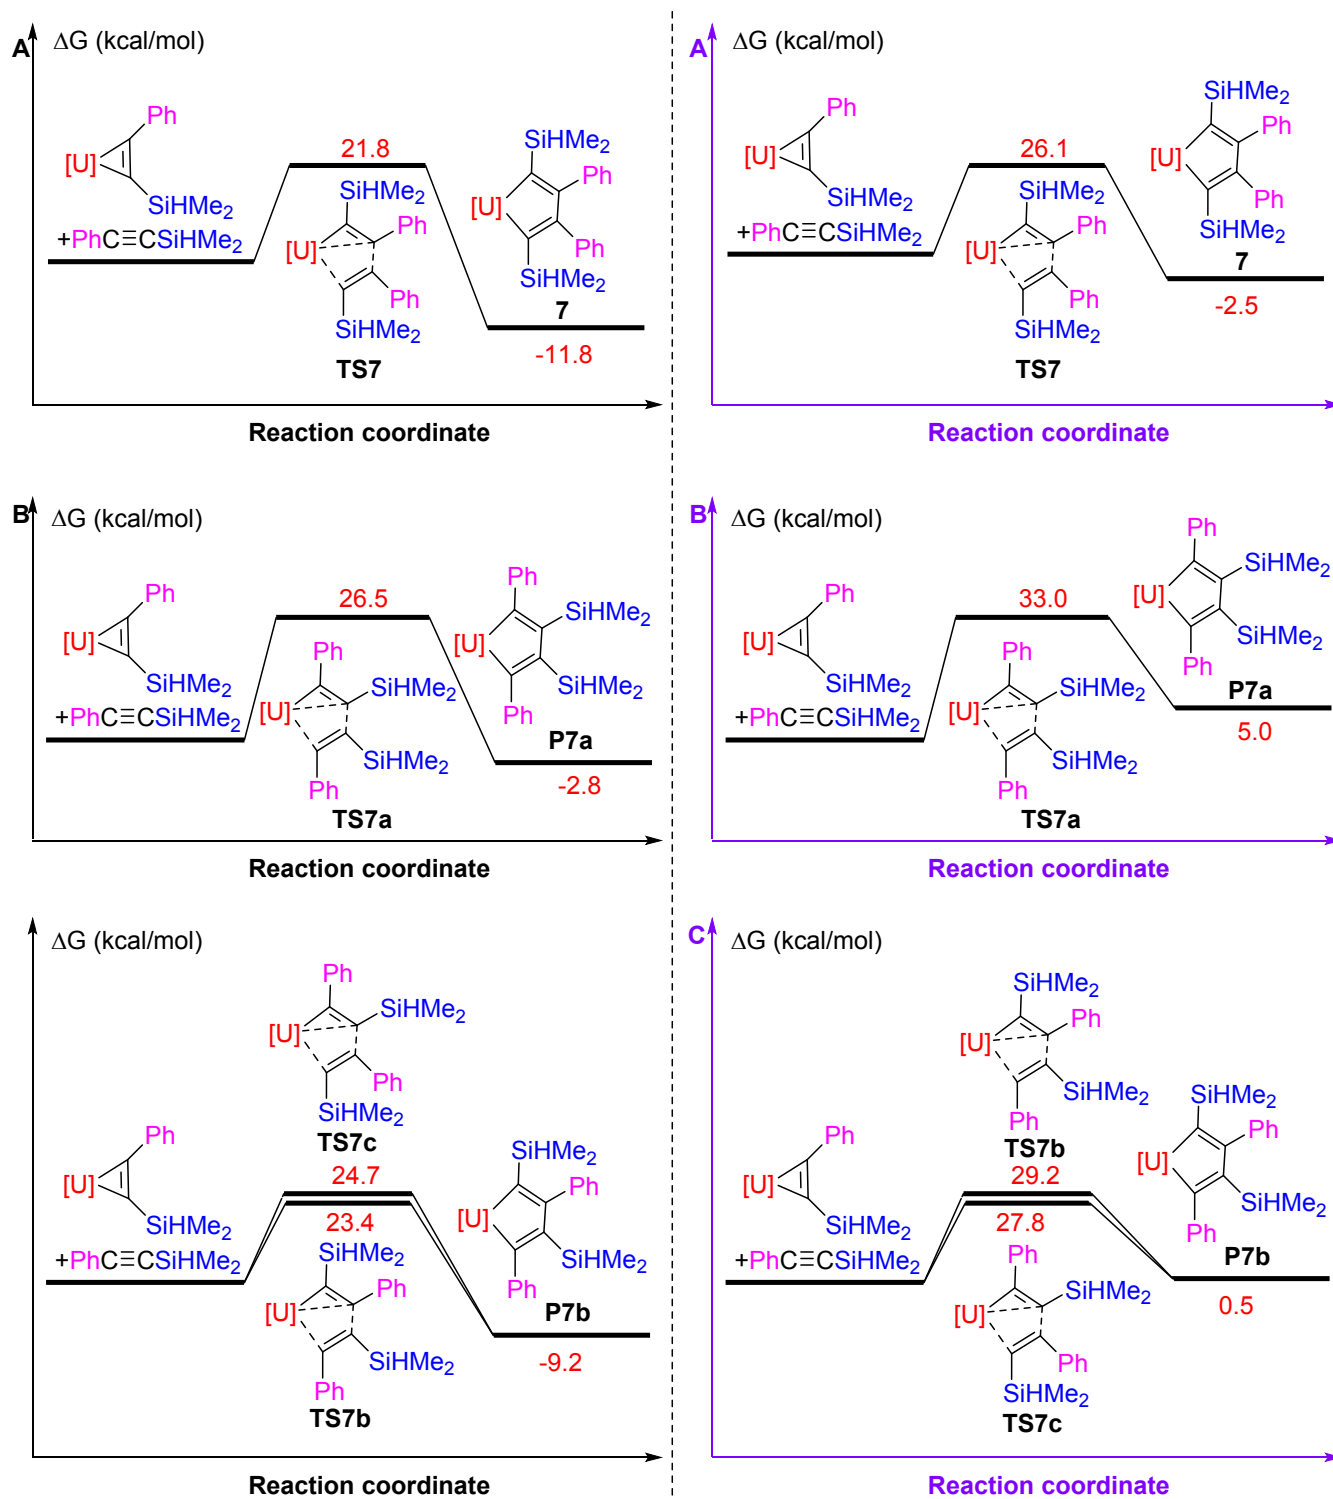

**Figure S4.** Free energy profile (kcal/mol) for the reaction of  $(\eta^5\text{-C}_5\text{Me}_5)_2\text{U}[\eta^2\text{-C}(\text{Ph})=\text{C}(\text{SiHMe}_2)] + \text{PhC}\equiv\text{CSiHMe}_2$  (U was treated with ECP80MWB (left) and ECP60MWB (right)). [U] =  $(\eta^5\text{-C}_5\text{Me}_5)_2\text{U}$ .

## 2. Additional experiments

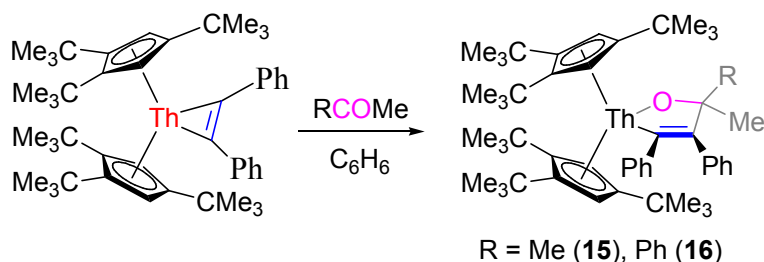

Scheme S1

**Preparation of  $[\eta^5\text{-}1,2,4\text{-(Me}_3\text{C)}_3\text{C}_5\text{H}_2]_2\text{Th[OCMe}_2\text{(C}_2\text{Ph}_2)]$  (15) Method A.** A toluene solution (5 mL) of acetone (15 mg, 0.25 mmol) was added to a toluene (10 mL) solution of  $[\eta^5\text{-}1,2,4\text{-(Me}_3\text{C)}_3\text{C}_5\text{H}_2]_2\text{Th}(\eta^2\text{-C}_2\text{Ph}_2)$  (220 mg, 0.25 mmol) with stirring at room temperature. After the solution was stirred at room temperature overnight, the solvent was removed. The residue was extracted with benzene (10 mL  $\times$  3) and filtered. The volume of the filtrate was reduced to 5 mL, yellow crystals of **15** were isolated when this solution was kept at room temperature for one week. Yield: 182 mg (78%) (Found: C, 65.46; H, 8.03.  $\text{C}_{51}\text{H}_{74}\text{OTh}$  requires C, 65.50; H, 7.98%). M.p.: 118-120 °C.  $^1\text{H}$  NMR ( $\text{C}_6\text{D}_6$ ):  $\delta$  7.07 (m, 8H, phenyl), 6.95 (s, 2H, ring CH), 6.84 (t,  $J = 7.2$  Hz, 1H, phenyl), 6.72 (t,  $J = 6.9$  Hz, 1H, phenyl), 6.64 (bs, 2H, ring CH), 1.62 (s, 36H,  $\text{C}(\text{CH}_3)_3$ ), 1.26 (s, 18H,  $\text{C}(\text{CH}_3)_3$ ), 1.23 (s, 6H,  $\text{C}(\text{CH}_3)_2$ ) ppm.  $^{13}\text{C}\{^1\text{H}\}$  NMR ( $\text{C}_6\text{D}_6$ ):  $\delta$  208.0 (ThCPh), 170.8 (CPh), 154.9 (phenyl C), 143.9 (phenyl C), 142.7 (phenyl C), 142.5 (phenyl C), 142.1 (phenyl C), 130.0 (phenyl C), 127.4 (phenyl C), 127.2 (phenyl C), 127.1 (ring C), 125.3 (ring C), 122.2 (ring C), 117.8 (ring C), 117.4 (ring C), 91.6 ( $\text{OCMe}_2$ ), 34.8 ( $\text{C}(\text{CH}_3)_3$ ), 34.6 ( $\text{C}(\text{CH}_3)_3$ ), 33.0 ( $\text{C}(\text{CH}_3)_3$ ), 31.9 ( $\text{C}(\text{CH}_3)_3$ ), 31.4 ( $\text{C}(\text{CH}_3)_3$ ), 31.0 ( $\text{C}(\text{CH}_3)_3$ ) ppm; two carbons overlapped. IR (KBr,  $\text{cm}^{-1}$ ): 2958 (s), 1593 (m), 1479 (s), 1390 (s), 1361 (s), 1238 (s), 1155 (s), 958 (s), 889 (s), 812 (s).

**Method B. NMR Scale.** A  $\text{C}_6\text{D}_6$  (0.3 mL) solution of acetone (1.2 mg, 0.02 mmol) was slowly added to a J. Young NMR tube charged with  $[\eta^5\text{-}1,2,4\text{-(Me}_3\text{C)}_3\text{C}_5\text{H}_2]_2\text{Th}(\eta^2\text{-C}_2\text{Ph}_2)$  (18 mg, 0.02 mmol) and  $\text{C}_6\text{D}_6$  (0.2 mL). Resonances of **15** were observed by  $^1\text{H}$  NMR spectroscopy (100% conversion).

**Preparation of [ $\eta^5$ -1,2,4-(Me<sub>3</sub>C)<sub>3</sub>C<sub>5</sub>H<sub>2</sub>]<sub>2</sub>Th[OCPhMe(C<sub>2</sub>Ph<sub>2</sub>)] (16). Method A.** This compound was prepared as colourless crystals from the reaction of [ $\eta^5$ -1,2,4-(Me<sub>3</sub>C)<sub>3</sub>C<sub>5</sub>H<sub>2</sub>]<sub>2</sub>Th( $\eta^2$ -C<sub>2</sub>Ph<sub>2</sub>) (220 mg, 0.25 mmol) and PhCOCH<sub>3</sub> (30 mg, 0.25 mmol) in toluene (15 mL) at room temperature and recrystallization from a benzene solution by a similar procedure as that in the synthesis of **15**. Yield: 204 mg (82%) (Found: C, 67.51; H, 7.65. C<sub>56</sub>H<sub>76</sub>OTh requires C, 67.45; H, 7.68.). M.p.: 180-182 °C. <sup>1</sup>H NMR (C<sub>6</sub>D<sub>6</sub>):  $\delta$  8.13 (d,  $J$  = 7.5 Hz, 2H, phenyl), 7.35 (m, 4H, phenyl), 7.15 (m, 6H, phenyl), 6.79 (m, 5H, phenyl, ring CH), 6.58 (s, 1H, ring CH), 6.40 (s, 1H, ring CH), 1.96 (s, 3H, CH<sub>3</sub>), 1.75 (s, 9H, C(CH<sub>3</sub>)<sub>3</sub>), 1.61 (s, 9H, C(CH<sub>3</sub>)<sub>3</sub>), 1.60 (s, 9H, C(CH<sub>3</sub>)<sub>3</sub>), 1.46 (s, 9H, C(CH<sub>3</sub>)<sub>3</sub>), 1.23 (s, 9H, C(CH<sub>3</sub>)<sub>3</sub>), 1.06 (s, 9H, C(CH<sub>3</sub>)<sub>3</sub>) ppm. <sup>13</sup>C{<sup>1</sup>H} NMR (C<sub>6</sub>D<sub>6</sub>):  $\delta$  213.7 (ThCPh), 168.4 (CPh), 147.0 (phenyl C), 143.9 (phenyl C), 143.4 (phenyl C), 141.9 (phenyl C), 137.8 (phenyl C), 130.7 (phenyl C), 129.3 (phenyl C), 129.1 (phenyl C), 128.5 (phenyl C), 127.3 (phenyl C), 127.0 (phenyl C), 125.6 (phenyl C), 125.4 (ring C), 122.5 (ring C), 119.5 (ring C), 118.1 (ring C), 116.4 (ring C), 94.5 (CO), 34.9 (C(CH<sub>3</sub>)<sub>3</sub>), 34.7 (C(CH<sub>3</sub>)<sub>3</sub>), 33.6 (C(CH<sub>3</sub>)<sub>3</sub>), 32.8 (C(CH<sub>3</sub>)<sub>3</sub>), 32.0 (CH<sub>3</sub>), 30.9 (C(CH<sub>3</sub>)<sub>3</sub>), 29.8 (C(CH<sub>3</sub>)<sub>3</sub>) ppm. IR (KBr, cm<sup>-1</sup>): 2958 (s), 1595 (m), 1479 (s), 1460 (s), 1390 (s), 1361 (s), 1236 (s), 1211 (s), 1093 (s), 1064 (s), 908 (s), 812 (s).

**Method B. NMR Scale.** A C<sub>6</sub>D<sub>6</sub> (0.3 mL) solution of PhCOCH<sub>3</sub> (2.4 mg, 0.02 mmol) was slowly added to a J. Young NMR tube charged with [ $\eta^5$ -1,2,4-(Me<sub>3</sub>C)<sub>3</sub>C<sub>5</sub>H<sub>2</sub>]<sub>2</sub>Th( $\eta^2$ -C<sub>2</sub>Ph<sub>2</sub>) (18 mg, 0.02 mmol) and C<sub>6</sub>D<sub>6</sub> (0.2 mL). Resonances of **16** were observed by <sup>1</sup>H NMR spectroscopy (100% conversion).

### 3. Crystal parameters

**Table S1. Crystal Data and Experimental Parameters for Compounds 2-4 and 6-8**

| Compound                                                      | 2                                                  | 3                                                                | 4                                                  | 2(6)·C <sub>6</sub> H <sub>6</sub>             | 7                                                 | 8                                                 |
|---------------------------------------------------------------|----------------------------------------------------|------------------------------------------------------------------|----------------------------------------------------|------------------------------------------------|---------------------------------------------------|---------------------------------------------------|
| Formula                                                       | C <sub>33</sub> H <sub>53</sub> NSi <sub>2</sub> U | C <sub>35</sub> H <sub>58</sub> N <sub>2</sub> Si <sub>2</sub> U | C <sub>49</sub> H <sub>63</sub> NSi <sub>2</sub> U | C <sub>82</sub> H <sub>98</sub> U <sub>2</sub> | C <sub>40</sub> H <sub>54</sub> Si <sub>2</sub> U | C <sub>42</sub> H <sub>58</sub> Si <sub>2</sub> U |
| Fw                                                            | 757.97                                             | 801.04                                                           | 960.21                                             | 1559.66                                        | 829.04                                            | 857.09                                            |
| crystal system                                                | triclinic                                          | orthorhombic                                                     | monoclinic                                         | triclinic                                      | triclinic                                         | monoclinic                                        |
| space group                                                   | <i>P</i> (-1)                                      | <i>Pbca</i>                                                      | <i>P2</i> <sub>1</sub> / <i>n</i>                  | <i>P</i> (-1)                                  | <i>P</i> (-1)                                     | <i>C2/c</i>                                       |
| <i>a</i> (Å)                                                  | 9.946(9)                                           | 19.17(2)                                                         | 9.716(5)                                           | 11.201(15)                                     | 10.010(7)                                         | 20.461(13)                                        |
| <i>b</i> (Å)                                                  | 10.905(10)                                         | 19.61(3)                                                         | 21.054(10)                                         | 15.69(2)                                       | 11.707(11)                                        | 12.778(9)                                         |
| <i>c</i> (Å)                                                  | 17.123(16)                                         | 20.30(3)                                                         | 21.626(9)                                          | 19.70(3)                                       | 17.678(12)                                        | 15.797(14)                                        |
| $\alpha$ (deg)                                                | 78.45(1)                                           | 90                                                               | 90                                                 | 88.63(2)                                       | 83.00(2)                                          | 90                                                |
| $\beta$ (deg)                                                 | 81.55(1)                                           | 90                                                               | 90.34(1)                                           | 81.50(3)                                       | 76.37(1)                                          | 108.45(1)                                         |
| $\gamma$ (deg)                                                | 68.88(1)                                           | 90                                                               | 90                                                 | 89.31(2)                                       | 65.07(1)                                          | 90                                                |
| <i>V</i> (Å <sup>3</sup> )                                    | 1692(3)                                            | 7631(18)                                                         | 4424(4)                                            | 3423(8)                                        | 1825(2)                                           | 3918(5)                                           |
| <i>Z</i>                                                      | 2                                                  | 8                                                                | 4                                                  | 2                                              | 2                                                 | 4                                                 |
| <i>D</i> <sub>calc</sub> (g/cm <sup>3</sup> )                 | 1.488                                              | 1.394                                                            | 1.442                                              | 1.513                                          | 1.508                                             | 1.453                                             |
| $\mu$ (Mo/K $\alpha$ ) <sub>calc</sub> (cm <sup>-1</sup> )    | 4.889                                              | 4.340                                                            | 3.756                                              | 4.769                                          | 4.538                                             | 4.231                                             |
| size (mm)                                                     | 0.20 × 0.20 × 0.20                                 | 0.20 × 0.10 × 0.10                                               | 0.35 × 0.10 × 0.10                                 | 0.20 × 0.20 × 0.15                             | 0.20 × 0.20 × 0.20                                | 0.20 × 0.20 × 0.10                                |
| <i>F</i> (000)                                                | 756                                                | 3216                                                             | 1936                                               | 1548                                           | 828                                               | 1720                                              |
| 2 $\theta$ range (deg)                                        | 4.06 to 55.81                                      | 3.59 to 54.80                                                    | 2.70 to 50.50                                      | 3.30 to 50.50                                  | 3.84 to 55.55                                     | 3.82 to 55.33                                     |
| no. of reflns, collected                                      | 11415                                              | 47262                                                            | 19859                                              | 18455                                          | 12571                                             | 12473                                             |
| no of obsd reflns                                             | 7806                                               | 8433                                                             | 7874                                               | 12239                                          | 8419                                              | 4520                                              |
| no of variables                                               | 350                                                | 374                                                              | 498                                                | 781                                            | 408                                               | 212                                               |
| abscorr ( <i>T</i> <sub>max</sub> , <i>T</i> <sub>min</sub> ) | 0.75, 0.57                                         | 0.75, 0.44                                                       | 0.75, 0.52                                         | 0.75, 0.50                                     | 0.75, 0.52                                        | 0.75, 0.59                                        |
| <i>R</i>                                                      | 0.064                                              | 0.043                                                            | 0.067                                              | 0.045                                          | 0.073                                             | 0.056                                             |
| <i>R</i> <sub>w</sub>                                         | 0.169                                              | 0.093                                                            | 0.155                                              | 0.101                                          | 0.168                                             | 0.127                                             |
| <i>R</i> <sub>all</sub>                                       | 0.071                                              | 0.082                                                            | 0.090                                              | 0.072                                          | 0.106                                             | 0.068                                             |
| Gof                                                           | 1.01                                               | 1.01                                                             | 0.98                                               | 0.96                                           | 0.95                                              | 1.01                                              |
| CCDC                                                          | 1496478                                            | 1496489                                                          | 1496486                                            | 1496480                                        | 1496479                                           | 1496477                                           |

**Table S2. Crystal Data and Experimental Parameters for Compounds 11-16**

| Compound                                                       | 11·0.5C <sub>6</sub> H <sub>6</sub>              | 12                                               | 13·C <sub>6</sub> H <sub>6</sub>                              | 14                                                 | 15                                  | 16                                  |
|----------------------------------------------------------------|--------------------------------------------------|--------------------------------------------------|---------------------------------------------------------------|----------------------------------------------------|-------------------------------------|-------------------------------------|
| Formula                                                        | C <sub>44</sub> H <sub>66</sub> N <sub>3</sub> U | C <sub>34</sub> H <sub>38</sub> O <sub>2</sub> U | C <sub>58</sub> H <sub>74</sub> O <sub>4</sub> U <sub>2</sub> | C <sub>34</sub> H <sub>58</sub> OSi <sub>2</sub> U | C <sub>51</sub> H <sub>74</sub> OTh | C <sub>56</sub> H <sub>76</sub> OTh |
| Fw                                                             | 875.02                                           | 716.67                                           | 1311.23                                                       | 777.01                                             | 935.14                              | 997.20                              |
| crystal system                                                 | triclinic                                        | monoclinic                                       | triclinic                                                     | triclinic                                          | triclinic                           | monoclinic                          |
| space group                                                    | <i>P</i> (-1)                                    | <i>P</i> 2 <sub>1</sub> / <i>c</i>               | <i>P</i> (-1)                                                 | <i>P</i> (-1)                                      | <i>P</i> (-1)                       | <i>P</i> 2 <sub>1</sub> / <i>c</i>  |
| <i>a</i> (Å)                                                   | 10.564(10)                                       | 9.525(4)                                         | 9.666(10)                                                     | 9.785(8)                                           | 10.578(8)                           | 11.624(4)                           |
| <i>b</i> (Å)                                                   | 13.462(12)                                       | 18.419(8)                                        | 11.556(12)                                                    | 10.877(9)                                          | 11.855(8)                           | 19.697(7)                           |
| <i>c</i> (Å)                                                   | 15.492(15)                                       | 16.332(7)                                        | 12.665(13)                                                    | 17.182(14)                                         | 20.884(15)                          | 20.839(8)                           |
| $\alpha$ (deg)                                                 | 75.61(2)                                         | 90                                               | 69.07(1)                                                      | 79.24(1)                                           | 77.73(1)                            | 90                                  |
| $\beta$ (deg)                                                  | 76.10(2)                                         | 92.40(1)                                         | 86.75(1)                                                      | 76.81(1)                                           | 82.30(1)                            | 97.45(1)                            |
| $\gamma$ (deg)                                                 | 74.44(1)                                         | 90                                               | 74.08(1)                                                      | 78.00(2)                                           | 68.24(1)                            | 90                                  |
| <i>V</i> (Å <sup>3</sup> )                                     | 2020(3)                                          | 2863(2)                                          | 1269(2)                                                       | 1723(2)                                            | 2372(3)                             | 4731(3)                             |
| <i>Z</i>                                                       | 2                                                | 4                                                | 1                                                             | 2                                                  | 2                                   | 4                                   |
| <i>D</i> <sub>calc</sub> (g/cm <sup>3</sup> )                  | 1.439                                            | 1.663                                            | 1.716                                                         | 1.498                                              | 1.309                               | 1.400                               |
| $\mu$ (Mo/K $\alpha$ ) <sub>calc</sub> (cm <sup>-1</sup> )     | 4.050                                            | 5.698                                            | 6.417                                                         | 4.803                                              | 3.175                               | 3.190                               |
| size (mm)                                                      | 0.20 × 0.20 × 0.20                               | 0.20 × 0.15 × 0.10                               | 0.30 × 0.10 × 0.10                                            | 0.20 × 0.15 × 0.15                                 | 0.15 × 0.15 × 0.15                  | 0.15 × 0.15 × 0.15                  |
| <i>F</i> (000)                                                 | 886                                              | 1400                                             | 638                                                           | 780                                                | 956                                 | 2040                                |
| 2 $\theta$ range (deg)                                         | 3.20 to 50.50                                    | 3.33 to 50.48                                    | 3.45 to 51.05                                                 | 3.87 to 50.50                                      | 3.76 to 55.77                       | 2.86 to 55.09                       |
| no. of reflns, collected                                       | 11284                                            | 15998                                            | 6469                                                          | 9009                                               | 10970                               | 31993                               |
| no of obsd reflns                                              | 7259                                             | 5172                                             | 4629                                                          | 6274                                               | 10970                               | 10878                               |
| no of variables                                                | 486                                              | 342                                              | 314                                                           | 359                                                | 499                                 | 542                                 |
| abs corr ( <i>T</i> <sub>max</sub> , <i>T</i> <sub>min</sub> ) | 0.75, 0.50                                       | 0.75, 0.59                                       | 0.75, 0.40                                                    | 0.75, 0.45                                         | 0.75, 0.63                          | 0.75, 0.55                          |
| <i>R</i>                                                       | 0.060                                            | 0.044                                            | 0.050                                                         | 0.078                                              | 0.087                               | 0.052                               |
| <i>R</i> <sub>w</sub>                                          | 0.162                                            | 0.089                                            | 0.125                                                         | 0.205                                              | 0.224                               | 0.094                               |
| <i>R</i> <sub>all</sub>                                        | 0.069                                            | 0.075                                            | 0.064                                                         | 0.087                                              | 0.099                               | 0.090                               |
| Gof                                                            | 1.01                                             | 1.03                                             | 1.08                                                          | 1.03                                               | 1.04                                | 0.96                                |
| CCDC                                                           | 1496484                                          | 1496485                                          | 1496483                                                       | 1496481                                            | 1496488                             | 1496490                             |



## 4. Computational details

**Table S3.** The optimized Cartesian Coordinates (in Å) and structures (the hydrogen atoms omitted for clarity) of stationary points for  $(\eta^5\text{-C}_5\text{Me}_5)_2\text{U}[\eta^2\text{-C}(\text{Ph})=\text{C}(\text{Me})]+\text{PhC}\equiv\text{CMe}$ , obtained with B3PW91-PCM method.

| Species                                                                                    | Cartesian coordinates |           |           |           |  |
|--------------------------------------------------------------------------------------------|-----------------------|-----------|-----------|-----------|--|
| $(\eta^5\text{-C}_5\text{Me}_5)_2\text{U}[\eta^2\text{-C}(\text{Ph})=\text{C}(\text{Me})]$ | C                     | -2.399506 | 1.866968  | -1.261602 |  |
|                                                                                            | C                     | -1.049553 | 2.220925  | -1.563231 |  |
|                                                                                            | C                     | -0.516663 | 1.227839  | -2.433328 |  |
|                                                                                            | C                     | -1.526477 | 0.242936  | -2.637771 |  |
|                                                                                            | C                     | -2.698334 | 0.651103  | -1.929427 |  |
|                                                                                            | C                     | -3.350450 | 2.727367  | -0.479100 |  |
|                                                                                            | H                     | -3.656387 | 3.606658  | -1.063600 |  |
|                                                                                            | H                     | -2.904962 | 3.112729  | 0.447471  |  |
|                                                                                            | H                     | -4.262572 | 2.189408  | -0.206109 |  |
|                                                                                            | C                     | -0.382612 | 3.504170  | -1.155574 |  |
|                                                                                            | H                     | 0.706716  | 3.434891  | -1.225919 |  |
|                                                                                            | H                     | -0.626744 | 3.792200  | -0.125620 |  |
|                                                                                            | H                     | -0.698683 | 4.339234  | -1.798027 |  |
|                                                                                            | C                     | 0.812221  | 1.293431  | -3.127811 |  |
|                                                                                            | H                     | 0.730196  | 1.841960  | -4.077625 |  |
|                                                                                            | H                     | 1.208046  | 0.299861  | -3.358224 |  |
|                                                                                            | H                     | 1.564083  | 1.802210  | -2.517805 |  |
|                                                                                            | C                     | -1.433600 | -0.945219 | -3.553294 |  |
|                                                                                            | H                     | -1.847787 | -0.719996 | -4.546724 |  |
|                                                                                            | H                     | -1.990403 | -1.810841 | -3.172854 |  |
|                                                                                            | H                     | -0.396271 | -1.261133 | -3.704938 |  |
|                                                                                            | C                     | -4.036629 | -0.023496 | -2.015224 |  |
|                                                                                            | H                     | -4.691182 | 0.251640  | -1.182437 |  |
|                                                                                            | H                     | -3.953558 | -1.116187 | -2.021395 |  |
|                                                                                            | H                     | -4.560324 | 0.257946  | -2.940320 |  |
|                                                                                            | C                     | -2.725484 | -0.637566 | 1.916561  |  |
|                                                                                            | C                     | -1.560203 | -0.210571 | 2.625200  |  |
|                                                                                            | C                     | -0.553283 | -1.206150 | 2.464490  |  |
|                                                                                            | C                     | -1.078877 | -2.226546 | 1.622202  |  |
|                                                                                            | C                     | -2.422908 | -1.876471 | 1.292753  |  |
|                                                                                            | C                     | -4.068735 | 0.030178  | 1.977767  |  |
|                                                                                            | H                     | -4.699965 | -0.229692 | 1.122275  |  |
|                                                                                            | H                     | -3.989911 | 1.122263  | 2.008104  |  |
|                                                                                            | H                     | -4.616316 | -0.272470 | 2.882137  |  |
|                                                                                            | C                     | -1.465772 | 1.002448  | 3.507719  |  |
|                                                                                            | H                     | -1.807600 | 0.783352  | 4.529616  |  |
|                                                                                            | H                     | -2.084182 | 1.830838  | 3.141704  |  |
|                                                                                            | H                     | -0.436780 | 1.369780  | 3.588073  |  |
|                                                                                            | C                     | 0.767981  | -1.250822 | 3.173973  |  |
|                                                                                            | H                     | 0.674313  | -1.761481 | 4.143764  |  |
| H                                                                                          | 1.162206              | -0.248915 | 3.372282  |           |  |
| H                                                                                          | 1.521731              | -1.788996 | 2.591718  |           |  |
| C                                                                                          | -0.398805             | -3.516963 | 1.260461  |           |  |
| H                                                                                          | 0.685197              | -3.398342 | 1.168228  |           |  |
| H                                                                                          | -0.765762             | -3.920594 | 0.309435  |           |  |
| H                                                                                          | -0.581325             | -4.289994 | 2.021359  |           |  |
| C                                                                                          | -3.369528             | -2.746354 | 0.514712  |           |  |
| H                                                                                          | -3.695973             | -3.608551 | 1.113030  |           |  |
| H                                                                                          | -2.913654             | -3.157489 | -0.395685 |           |  |
| H                                                                                          | -4.270486             | -2.204028 | 0.213922  |           |  |
| C                                                                                          | 1.420374              | 0.585100  | 0.320789  |           |  |
| C                                                                                          | 1.436668              | -0.638210 | -0.260581 |           |  |
| U                                                                                          | -0.769317             | -0.027485 | -0.002364 |           |  |
| C                                                                                          | 2.564223              | -1.505573 | -0.606463 |           |  |
| C                                                                                          | 2.585834              | -2.211979 | -1.825298 |           |  |

|         |                                                                                                                                                                                                                                                                                                                                                                                                                                                                                                                                                                                                                                                                                                                                                                                                                                                                                                                                                                                                                                                                                                                                                |                                                                                      |
|---------|------------------------------------------------------------------------------------------------------------------------------------------------------------------------------------------------------------------------------------------------------------------------------------------------------------------------------------------------------------------------------------------------------------------------------------------------------------------------------------------------------------------------------------------------------------------------------------------------------------------------------------------------------------------------------------------------------------------------------------------------------------------------------------------------------------------------------------------------------------------------------------------------------------------------------------------------------------------------------------------------------------------------------------------------------------------------------------------------------------------------------------------------|--------------------------------------------------------------------------------------|
|         | C 3.651901 -1.699901 0.270118<br>C 3.650369 -3.040841 -2.167708<br>C 4.706045 -2.549350 -0.060376<br>C 4.717245 -3.218216 -1.284570<br>H 1.748281 -2.097131 -2.510101<br>H 3.657086 -1.184148 1.226825<br>H 3.642467 -3.561663 -3.122895<br>H 5.527304 -2.684730 0.640365<br>H 5.543165 -3.875438 -1.545121<br>C 2.567427 1.461631 0.729252<br>H 2.680832 1.455043 1.823411<br>H 3.531446 1.149993 0.299902<br>H 2.393280 2.510051 0.453406                                                                                                                                                                                                                                                                                                                                                                                                                                                                                                                                                                                                                                                                                                    |                                                                                      |
| PhC≡CMe | C 2.605992 0.000579 -0.000946<br>C 1.392015 0.000160 -0.001847<br>C -0.035932 0.000073 -0.001397<br>C -0.752142 1.211087 -0.000817<br>H -0.205158 2.149562 -0.001239<br>C -2.143595 1.206738 0.000554<br>H -2.683551 2.150218 0.001158<br>C -2.844394 -0.000132 0.001312<br>H -3.931280 -0.000211 0.002595<br>C -2.143418 -1.206898 0.000542<br>H -2.683239 -2.150457 0.001161<br>C -0.751963 -1.211045 -0.000827<br>H -0.204843 -2.149442 -0.001231<br>C 4.062043 -0.000215 0.001640<br>H 4.458917 -0.876638 -0.524698<br>H 4.460006 0.894518 -0.491865<br>H 4.457503 -0.019625 1.024841                                                                                                                                                                                                                                                                                                                                                                                                                                                                                                                                                      | 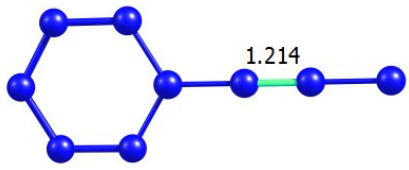   |
| TS6a    | C 0.754857 -2.428696 -1.402799<br>C 1.902431 -1.776121 -1.939407<br>C 2.902429 -1.733983 -0.930188<br>C 2.363176 -2.340160 0.242269<br>C 1.046226 -2.790158 -0.058366<br>C -0.439082 -2.855576 -2.209534<br>H -0.142457 -3.550965 -3.007862<br>H -0.954555 -2.016169 -2.692206<br>H -1.170379 -3.380013 -1.588776<br>C 2.129134 -1.474686 -3.392929<br>H 2.629843 -2.320516 -3.888093<br>H 2.767690 -0.598331 -3.551594<br>H 1.189494 -1.306616 -3.928350<br>C 4.340344 -1.385210 -1.181100<br>H 4.914256 -1.308432 -0.254907<br>H 4.465168 -0.442913 -1.727407<br>H 4.819118 -2.165219 -1.791504<br>C 3.098914 -2.639045 1.517599<br>H 4.007212 -2.038062 1.616114<br>H 3.406097 -3.693999 1.561715<br>H 2.482781 -2.452565 2.405108<br>C 0.217524 -3.673996 0.826405<br>H -0.855325 -3.511786 0.694321<br>H 0.439390 -3.508751 1.884686<br>H 0.422498 -4.734256 0.615161<br>C 2.608096 2.260945 -0.112545<br>C 3.024910 1.487110 1.008052<br>C 1.991767 1.531964 1.984933<br>C 0.933575 2.334273 1.468690<br>C 1.319063 2.791777 0.176180<br>C 3.485682 2.616036 -1.280011<br>H 4.327511 3.245938 -0.959402<br>H 2.943006 3.179785 -2.044723 |  |

|            |                                                                                                                                                                                                                                                                                                                                                                                                                                                                                                                                                                                                                                                                                                                                                                                                                                                                                                                                                                                                                                                                                                                                                                                                                                                                                                                                                                                                                                                                                                                                                                                                                                                                                                                                                                                                            |  |
|------------|------------------------------------------------------------------------------------------------------------------------------------------------------------------------------------------------------------------------------------------------------------------------------------------------------------------------------------------------------------------------------------------------------------------------------------------------------------------------------------------------------------------------------------------------------------------------------------------------------------------------------------------------------------------------------------------------------------------------------------------------------------------------------------------------------------------------------------------------------------------------------------------------------------------------------------------------------------------------------------------------------------------------------------------------------------------------------------------------------------------------------------------------------------------------------------------------------------------------------------------------------------------------------------------------------------------------------------------------------------------------------------------------------------------------------------------------------------------------------------------------------------------------------------------------------------------------------------------------------------------------------------------------------------------------------------------------------------------------------------------------------------------------------------------------------------|--|
|            | H 3.924012 1.736675 -1.768694<br>C 4.427653 1.023998 1.271551<br>H 4.968274 1.774315 1.868661<br>H 4.996498 0.882335 0.349087<br>H 4.465926 0.088266 1.838530<br>C 2.141238 1.031673 3.392383<br>H 2.854647 1.657164 3.949556<br>H 2.519240 0.003859 3.437894<br>H 1.194961 1.056730 3.937237<br>C -0.286479 2.789369 2.215347<br>H -0.521500 2.122427 3.049510<br>H -1.173575 2.825731 1.574280<br>H -0.144430 3.798623 2.629936<br>C 0.588236 3.847860 -0.601328<br>H 0.713549 4.831494 -0.126085<br>H -0.487881 3.656422 -0.663015<br>H 0.961092 3.940161 -1.625460<br>C -0.422374 -0.625014 1.799516<br>C -1.356651 -0.569506 0.844309<br>C -1.464402 1.005974 -1.595494<br>C -0.327936 1.067141 -2.092769<br>H -0.706156 -0.247171 3.893678<br>H 0.347946 -1.612823 3.575560<br>C -2.765699 -0.934258 1.000727<br>C -3.342312 -2.005543 0.294182<br>H -2.744305 -2.525734 -0.447592<br>C -4.651772 -2.415034 0.536149<br>H -5.059726 -3.260857 -0.013671<br>C -5.441886 -1.741167 1.467185<br>H -6.466592 -2.054733 1.651047<br>C -4.899568 -0.655816 2.157330<br>H -5.503501 -0.117369 2.884937<br>C -3.581875 -0.264947 1.934907<br>H -3.164136 0.569970 2.492065<br>C -2.874156 1.167360 -1.413082<br>C -3.773535 0.291199 -2.046175<br>H -3.387475 -0.564920 -2.590258<br>C -5.143122 0.524531 -1.982861<br>H -5.826994 -0.161141 -2.475815<br>C -5.638496 1.628413 -1.289058<br>H -6.709444 1.806991 -1.241960<br>C -4.754244 2.500778 -0.652491<br>H -5.133592 3.362460 -0.109504<br>C -3.384244 2.272624 -0.708367<br>H -2.697786 2.954396 -0.216407<br>H 0.382180 0.900648 -4.082110<br>H 0.331124 2.555152 -3.451632<br>C -0.553067 -1.099453 3.217588<br>H -1.414041 -1.769939 3.352694<br>C 0.557604 1.514506 -3.192267<br>H 1.620985 1.449956 -2.948406<br>U 0.825607 -0.005647 -0.010941 |  |
| <b>P6a</b> | C 0.989122 -2.384710 -1.441667<br>C 2.152117 -1.739571 -1.947507<br>C 3.161455 -1.792004 -0.941494<br>C 2.612706 -2.457410 0.193144<br>C 1.273244 -2.828974 -0.116628<br>C -0.258598 -2.714696 -2.207386<br>H -0.234765 -3.755926 -2.561066<br>H -0.379093 -2.073901 -3.085579<br>H -1.157725 -2.600510 -1.592976<br>C 2.350851 -1.211867 -3.339870<br>H 2.864866 -1.948931 -3.973715                                                                                                                                                                                                                                                                                                                                                                                                                                                                                                                                                                                                                                                                                                                                                                                                                                                                                                                                                                                                                                                                                                                                                                                                                                                                                                                                                                                                                      |  |

|   |           |           |           |
|---|-----------|-----------|-----------|
| H | 2.965240  | -0.302969 | -3.357440 |
| H | 1.400576  | -0.973837 | -3.826759 |
| C | 4.600222  | -1.416985 | -1.150381 |
| H | 5.142322  | -1.316475 | -0.206243 |
| H | 4.713898  | -0.475500 | -1.700419 |
| H | 5.119963  | -2.187655 | -1.738077 |
| C | 3.353710  | -2.819379 | 1.449555  |
| H | 4.175534  | -2.125432 | 1.656288  |
| H | 3.795385  | -3.823491 | 1.377645  |
| H | 2.699576  | -2.825605 | 2.329102  |
| C | 0.384345  | -3.718813 | 0.703012  |
| H | -0.667085 | -3.421714 | 0.640268  |
| H | 0.662636  | -3.715889 | 1.761193  |
| H | 0.453215  | -4.760573 | 0.356907  |
| C | 2.714319  | 2.295030  | -0.040100 |
| C | 3.218141  | 1.577801  | 1.084506  |
| C | 2.194445  | 1.549225  | 2.076236  |
| C | 1.069538  | 2.261275  | 1.573527  |
| C | 1.390136  | 2.722500  | 0.262960  |
| C | 3.484692  | 2.648529  | -1.281558 |
| H | 3.955946  | 3.637649  | -1.191944 |
| H | 2.843318  | 2.684955  | -2.169938 |
| H | 4.287841  | 1.932009  | -1.485235 |
| C | 4.638619  | 1.141963  | 1.300731  |
| H | 5.192380  | 1.898866  | 1.875201  |
| H | 5.176794  | 1.000390  | 0.359441  |
| H | 4.709471  | 0.206212  | 1.867114  |
| C | 2.347003  | 0.986704  | 3.460590  |
| H | 2.836586  | 1.708307  | 4.130495  |
| H | 2.962328  | 0.078843  | 3.475013  |
| H | 1.381139  | 0.734963  | 3.908643  |
| C | -0.165437 | 2.640883  | 2.336735  |
| H | -0.326738 | 1.990189  | 3.200886  |
| H | -1.064786 | 2.587598  | 1.714396  |
| H | -0.088373 | 3.671598  | 2.712965  |
| C | 0.554569  | 3.671737  | -0.546045 |
| H | 0.681152  | 4.703489  | -0.186215 |
| H | -0.511827 | 3.433138  | -0.487768 |
| H | 0.833565  | 3.666525  | -1.603991 |
| C | -0.649323 | -0.526567 | 1.388115  |
| C | -1.768287 | -0.263431 | 0.637378  |
| C | -1.716625 | 0.370320  | -0.728659 |
| C | -0.548943 | 0.568747  | -1.423974 |
| H | -0.840084 | -0.391603 | 3.536516  |
| H | 0.185052  | -1.709553 | 3.001394  |
| C | -3.127498 | -0.647899 | 1.148053  |
| C | -3.874722 | -1.652885 | 0.516280  |
| H | -3.482173 | -2.122289 | -0.382445 |
| C | -5.108234 | -2.057656 | 1.022129  |
| H | -5.666783 | -2.842252 | 0.516904  |
| C | -5.627775 | -1.457668 | 2.169576  |
| H | -6.592342 | -1.769242 | 2.562721  |
| C | -4.899101 | -0.454235 | 2.807061  |
| H | -5.294539 | 0.023314  | 3.700718  |
| C | -3.660507 | -0.059289 | 2.303000  |
| H | -3.097374 | 0.723171  | 2.805990  |
| C | -3.026744 | 0.834126  | -1.298799 |
| C | -3.545612 | 0.272794  | -2.473611 |
| H | -3.008607 | -0.542855 | -2.951985 |
| C | -4.738114 | 0.736642  | -3.027785 |
| H | -5.124485 | 0.279188  | -3.935813 |
| C | -5.432690 | 1.782810  | -2.421709 |
| H | -6.361326 | 2.147528  | -2.853748 |

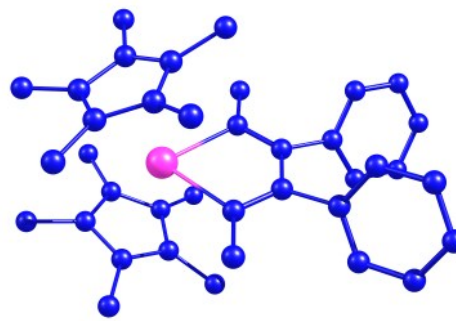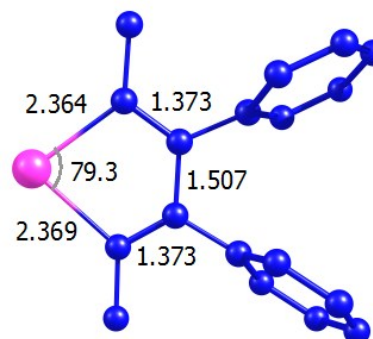

|             |                                                                                                                                                                                                                                                                                                                                                                                                                                                                                                                                                                                                                                                                                                                                                                                                                                                                                                                                                                                                                                                                                                                                                                                                                                                                                                                                                                                                                                                                                                                                                                                                                                                                                                                                                                                                   |                                                                                      |
|-------------|---------------------------------------------------------------------------------------------------------------------------------------------------------------------------------------------------------------------------------------------------------------------------------------------------------------------------------------------------------------------------------------------------------------------------------------------------------------------------------------------------------------------------------------------------------------------------------------------------------------------------------------------------------------------------------------------------------------------------------------------------------------------------------------------------------------------------------------------------------------------------------------------------------------------------------------------------------------------------------------------------------------------------------------------------------------------------------------------------------------------------------------------------------------------------------------------------------------------------------------------------------------------------------------------------------------------------------------------------------------------------------------------------------------------------------------------------------------------------------------------------------------------------------------------------------------------------------------------------------------------------------------------------------------------------------------------------------------------------------------------------------------------------------------------------|--------------------------------------------------------------------------------------|
|             | C -4.925710 2.356829 -1.255531<br>H -5.457735 3.174486 -0.774696<br>C -3.739162 1.883307 -0.699558<br>H -3.356699 2.333040 0.213545<br>H -0.633260 0.452931 -3.580217<br>H -1.337699 1.938767 -2.949611<br>C -0.731661 -1.158267 2.755727<br>H -1.578669 -1.847241 2.876658<br>C -0.530938 1.210459 -2.789505<br>H 0.421766 1.720151 -2.984209<br>U 1.221468 -0.045079 0.025388                                                                                                                                                                                                                                                                                                                                                                                                                                                                                                                                                                                                                                                                                                                                                                                                                                                                                                                                                                                                                                                                                                                                                                                                                                                                                                                                                                                                                   |                                                                                      |
| <b>TS6b</b> | C -0.760176 -1.271296 2.524919<br>C -1.666939 -1.753728 1.543007<br>C -0.933816 -2.559405 0.622251<br>C 0.422507 -2.590409 1.054222<br>C 0.535365 -1.778383 2.215465<br>C -1.165963 -0.634114 3.821435<br>H -0.305998 -0.237843 4.367119<br>H -1.646877 -1.377466 4.475140<br>H -1.886350 0.181829 3.694290<br>C -3.160620 -1.646950 1.648992<br>H -3.540422 -2.354205 2.401909<br>H -3.664653 -1.877099 0.707124<br>H -3.491686 -0.649953 1.961154<br>C -1.514455 -3.392255 -0.484687<br>H -0.860148 -3.421842 -1.362294<br>H -2.485197 -3.008095 -0.811450<br>H -1.671375 -4.431924 -0.161831<br>C 1.490594 -3.493088 0.511357<br>H 2.469355 -3.005927 0.458961<br>H 1.245648 -3.840932 -0.495642<br>H 1.599375 -4.386016 1.144562<br>C 1.750629 -1.664963 3.091821<br>H 2.633773 -2.083186 2.600272<br>H 1.614654 -2.220141 4.031316<br>H 1.986614 -0.630598 3.368652<br>C 0.342856 2.257413 1.837445<br>C -0.918098 2.523517 1.224535<br>C -0.686779 2.791639 -0.155922<br>C 0.711621 2.665006 -0.396966<br>C 1.347909 2.347414 0.836427<br>C 0.621947 2.234606 3.312752<br>H 1.394703 1.508335 3.587966<br>H -0.269801 2.005957 3.900633<br>H 0.987273 3.217866 3.645395<br>C -2.220716 2.668509 1.963002<br>H -2.725962 1.714988 2.169820<br>H -2.929009 3.290280 1.404363<br>H -2.067335 3.157755 2.932107<br>C -1.663680 3.354833 -1.152223<br>H -2.623133 3.600017 -0.685721<br>H -1.873086 2.681403 -1.991513<br>H -1.272953 4.288319 -1.578060<br>C 1.413027 3.048637 -1.667984<br>H 2.300525 2.433530 -1.847574<br>H 1.747027 4.096518 -1.631827<br>H 0.756398 2.956090 -2.539113<br>C 2.822042 2.388824 1.107667<br>H 3.110344 3.372973 1.507605<br>H 3.410685 2.212603 0.204834<br>H 3.132815 1.641169 1.845174<br>C -1.999896 0.007747 -1.882410<br>C -0.994879 0.080896 -2.596275 | 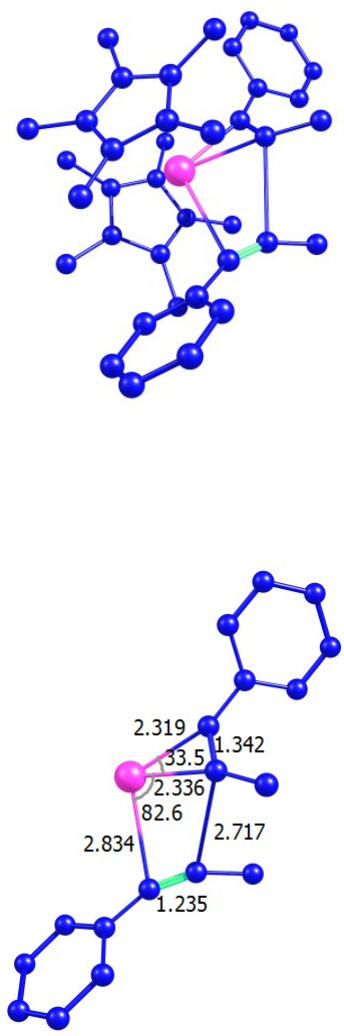 |

|            |                                                                                                                                                                                                                                                                                                                                                                                                                                                                                                                                                                                                                                                                                                                                                                                                                                                                                                                                                                                                                                                                                                                                                            |                                                                                                                                                                                                                                                                                                                                                                                                 |
|------------|------------------------------------------------------------------------------------------------------------------------------------------------------------------------------------------------------------------------------------------------------------------------------------------------------------------------------------------------------------------------------------------------------------------------------------------------------------------------------------------------------------------------------------------------------------------------------------------------------------------------------------------------------------------------------------------------------------------------------------------------------------------------------------------------------------------------------------------------------------------------------------------------------------------------------------------------------------------------------------------------------------------------------------------------------------------------------------------------------------------------------------------------------------|-------------------------------------------------------------------------------------------------------------------------------------------------------------------------------------------------------------------------------------------------------------------------------------------------------------------------------------------------------------------------------------------------|
|            | C 2.120412 -0.348759 -0.775399<br>C 1.261191 -1.020443 -1.557576<br>C -4.037467 0.758140 -0.650347<br>H -3.472864 1.557510 -0.186601<br>C -5.398239 0.621895 -0.390318<br>H -5.886433 1.322778 0.281890<br>C -6.131873 -0.404919 -0.983272<br>H -7.193203 -0.510385 -0.775588<br>C -5.493145 -1.295866 -1.848166<br>H -6.056410 -2.096601 -2.320407<br>C -4.135503 -1.162782 -2.119159<br>H -3.642917 -1.847222 -2.803422<br>C -3.385434 -0.129248 -1.520902<br>C -0.214640 0.365333 -3.807017<br>H -0.024361 -0.554281 -4.368336<br>H 0.747345 0.830964 -3.585536<br>H -0.793872 1.041966 -4.448339<br>C 3.582515 -0.308182 -0.851646<br>C 4.396316 -0.638727 0.248473<br>H 3.922930 -0.914398 1.186618<br>C 5.785811 -0.616898 0.155713<br>H 6.385680 -0.891249 1.020981<br>C 6.409949 -0.230088 -1.031105<br>H 7.494508 -0.200551 -1.099207<br>C 5.622521 0.123567 -2.127577<br>H 6.093174 0.430922 -3.059209<br>C 4.232991 0.075231 -2.042444<br>H 3.632081 0.344206 -2.908182<br>C 1.558868 -1.987552 -2.668870<br>H 1.972207 -1.483058 -3.552368<br>H 2.321455 -2.712771 -2.353963<br>H 0.676226 -2.549596 -2.999410<br>U 0.011950 0.029692 0.114112 |                                                                                                                                                                                                                                                                                                                                                                                                 |
| <b>P6b</b> | C -0.654901 -1.280624 2.802736<br>C -1.597805 -1.737568 1.838107<br>C -0.901940 -2.522582 0.878290<br>C 0.474885 -2.560039 1.250365<br>C 0.626824 -1.788718 2.438957<br>C -1.003202 -0.634185 4.112377<br>H -0.131723 -0.177717 4.589282<br>H -1.401213 -1.381304 4.815010<br>H -1.771810 0.141307 4.014317<br>C -3.085075 -1.559673 1.939890<br>H -3.511383 -2.270902 2.662488<br>H -3.586167 -1.721459 0.982235<br>H -3.361727 -0.556746 2.286337<br>C -1.504521 -3.372796 -0.199737<br>H -0.888322 -3.382307 -1.105075<br>H -2.501697 -3.027017 -0.482124<br>H -1.599313 -4.414864 0.140665<br>C 1.482563 -3.470212 0.604307<br>H 2.460297 -3.416558 1.090991<br>H 1.633920 -3.247784 -0.457574<br>H 1.147263 -4.514377 0.673865<br>C 1.870110 -1.649468 3.274094<br>H 2.723241 -2.163525 2.821880<br>H 1.723022 -2.089835 4.269358<br>H 2.169389 -0.605461 3.435362<br>C 0.388731 2.372395 2.006005<br>C -0.835644 2.624921 1.320182<br>C -0.539841 2.795232 -0.063191<br>C 0.869395 2.645073 -0.229965<br>C 1.441326 2.389742 1.046502                                                                                                                | <p>A 3D ball-and-stick model of a complex organic molecule. The structure features a central pink atom (likely a metal or a specific non-carbon atom) coordinated to several nitrogen atoms (blue) and carbon atoms (grey). The molecule has a highly branched, cage-like structure with multiple rings and a complex spatial arrangement. Hydrogen atoms are shown as small white spheres.</p> |

|             |                                                                                                                                                                                                                                                                                                                                                                                                                                                                                                                                                                                                                                                                                                                                                                                                                                                                                                                                                                                                                                                                                                                                                                                                                                                                                                                                                                                                                                                                                                                                                                                                                                                                                                                                                                                                                                                                                                                         |  |
|-------------|-------------------------------------------------------------------------------------------------------------------------------------------------------------------------------------------------------------------------------------------------------------------------------------------------------------------------------------------------------------------------------------------------------------------------------------------------------------------------------------------------------------------------------------------------------------------------------------------------------------------------------------------------------------------------------------------------------------------------------------------------------------------------------------------------------------------------------------------------------------------------------------------------------------------------------------------------------------------------------------------------------------------------------------------------------------------------------------------------------------------------------------------------------------------------------------------------------------------------------------------------------------------------------------------------------------------------------------------------------------------------------------------------------------------------------------------------------------------------------------------------------------------------------------------------------------------------------------------------------------------------------------------------------------------------------------------------------------------------------------------------------------------------------------------------------------------------------------------------------------------------------------------------------------------------|--|
|             | C 0.579151 2.384567 3.495487<br>H 1.339346 1.670887 3.833943<br>H -0.347706 2.159442 4.029571<br>H 0.912798 3.377574 3.831482<br>C -2.166340 2.828342 1.992275<br>H -2.537425 1.932884 2.508944<br>H -2.937786 3.130662 1.277861<br>H -2.103325 3.621641 2.748673<br>C -1.450998 3.298828 -1.148292<br>H -2.480783 3.422302 -0.802232<br>H -1.478616 2.635141 -2.019504<br>H -1.110753 4.283230 -1.498961<br>C 1.601509 2.952423 -1.501809<br>H 2.625997 2.572990 -1.484552<br>H 1.653969 4.039779 -1.662212<br>H 1.102398 2.519166 -2.375110<br>C 2.905711 2.330940 1.373257<br>H 3.266098 3.312612 1.714082<br>H 3.508911 2.039938 0.509584<br>H 3.126103 1.619571 2.178323<br>C -1.382180 -0.291085 -1.455734<br>C -0.564875 -0.484997 -2.544205<br>C 1.598225 -0.363743 -1.259458<br>C 0.915837 -0.670175 -2.413151<br>C -3.609457 0.623053 -0.780482<br>H -3.079505 1.358217 -0.182198<br>C -5.001358 0.608894 -0.780577<br>H -5.547854 1.341479 -0.190564<br>C -5.694062 -0.348324 -1.522715<br>H -6.780860 -0.369524 -1.518880<br>C -4.970326 -1.287250 -2.258973<br>H -5.493863 -2.050866 -2.830292<br>C -3.577400 -1.258623 -2.268714<br>H -3.035279 -2.011628 -2.833919<br>C -2.851450 -0.291864 -1.538057<br>C -1.090395 -0.476556 -3.970601<br>H -1.087917 -1.472581 -4.433396<br>H -0.468574 0.162895 -4.609076<br>H -2.113642 -0.097602 -4.010393<br>C 3.067842 -0.355124 -1.175866<br>C 3.729078 -0.863196 -0.040148<br>H 3.133087 -1.317301 0.745546<br>C 5.113430 -0.805395 0.096221<br>H 5.584535 -1.221351 0.984214<br>C 5.893933 -0.208306 -0.894124<br>H 6.974298 -0.153367 -0.787581<br>C 5.264921 0.327838 -2.018572<br>H 5.855806 0.809246 -2.794924<br>C 3.880847 0.253412 -2.157982<br>H 3.411344 0.691493 -3.034321<br>C 1.600399 -1.265546 -3.632906<br>H 1.674394 -0.558436 -4.469834<br>H 2.612362 -1.598246 -3.393063<br>H 1.039467 -2.130745 -4.007047<br>U -0.004273 0.086959 0.465703 |  |
| <b>TS6c</b> | C 1.761479 -1.038783 2.275110<br>C 1.747560 0.378768 2.171052<br>C 0.430711 0.830644 2.482599<br>C -0.363341 -0.309950 2.788432<br>C 0.451860 -1.466937 2.641149<br>C 3.007541 -1.875369 2.305479<br>H 2.781791 -2.944295 2.284650<br>H 3.570379 -1.683797 3.231410                                                                                                                                                                                                                                                                                                                                                                                                                                                                                                                                                                                                                                                                                                                                                                                                                                                                                                                                                                                                                                                                                                                                                                                                                                                                                                                                                                                                                                                                                                                                                                                                                                                     |  |

|   |           |           |           |
|---|-----------|-----------|-----------|
| H | 3.690158  | -1.661565 | 1.475080  |
| C | 2.973896  | 1.234727  | 2.041387  |
| H | 3.514428  | 1.276079  | 2.999361  |
| H | 2.734245  | 2.263600  | 1.760556  |
| H | 3.681392  | 0.849815  | 1.298120  |
| C | 0.029080  | 2.259746  | 2.708385  |
| H | -1.053026 | 2.398201  | 2.626456  |
| H | 0.511391  | 2.941968  | 2.002104  |
| H | 0.314559  | 2.591488  | 3.717987  |
| C | -1.750354 | -0.273467 | 3.360358  |
| H | -2.276593 | -1.221768 | 3.219159  |
| H | -2.367103 | 0.506123  | 2.903925  |
| H | -1.717508 | -0.077666 | 4.442407  |
| C | 0.065555  | -2.868903 | 3.016774  |
| H | -1.019670 | -3.004072 | 3.015934  |
| H | 0.419361  | -3.119131 | 4.027737  |
| H | 0.488783  | -3.618986 | 2.339596  |
| C | 1.452406  | -2.724184 | -1.061038 |
| C | 2.116991  | -1.630239 | -1.690607 |
| C | 1.189603  | -1.001171 | -2.571494 |
| C | -0.050594 | -1.693714 | -2.468559 |
| C | 0.115841  | -2.764797 | -1.545624 |
| C | 2.109656  | -3.850309 | -0.316811 |
| H | 1.498648  | -4.225150 | 0.511312  |
| H | 3.081637  | -3.566055 | 0.091796  |
| H | 2.277372  | -4.703493 | -0.991474 |
| C | 3.583778  | -1.321357 | -1.558688 |
| H | 3.835525  | -0.717179 | -0.676253 |
| H | 3.957260  | -0.777973 | -2.433624 |
| H | 4.172150  | -2.243516 | -1.484935 |
| C | 1.493870  | 0.034578  | -3.619343 |
| H | 2.554230  | 0.305028  | -3.628630 |
| H | 0.924687  | 0.962623  | -3.495309 |
| H | 1.260429  | -0.357038 | -4.618450 |
| C | -1.248296 | -1.477569 | -3.348009 |
| H | -2.187587 | -1.545870 | -2.788598 |
| H | -1.291060 | -2.227230 | -4.152022 |
| H | -1.219925 | -0.495709 | -3.830449 |
| C | -0.825023 | -3.915762 | -1.345069 |
| H | -0.469377 | -4.802224 | -1.891758 |
| H | -1.826341 | -3.685830 | -1.717893 |
| H | -0.923400 | -4.204672 | -0.293317 |
| C | 0.413760  | 2.057184  | -1.061826 |
| C | -0.743163 | 1.882607  | -1.463503 |
| C | -2.216841 | 0.009424  | 0.003478  |
| C | -2.012827 | -1.288905 | 0.255259  |
| C | 2.894705  | 2.314360  | -1.230561 |
| H | 2.975241  | 1.335313  | -1.686591 |
| C | 4.034531  | 3.094169  | -1.052993 |
| H | 4.999748  | 2.709092  | -1.371824 |
| C | 3.943457  | 4.357273  | -0.469939 |
| H | 4.835385  | 4.961517  | -0.328349 |
| C | 2.695534  | 4.841918  | -0.073064 |
| H | 2.610469  | 5.828616  | 0.375046  |
| C | 1.550909  | 4.072920  | -0.255376 |
| H | 0.579018  | 4.459352  | 0.037130  |
| C | 1.634569  | 2.791097  | -0.837183 |
| C | -1.939540 | 2.100597  | -2.280917 |
| H | -2.705872 | 2.637397  | -1.715589 |
| H | -2.383642 | 1.167499  | -2.631220 |
| H | -1.657256 | 2.707687  | -3.151218 |
| C | -3.477884 | 0.753095  | 0.034003  |
| C | -3.588019 | 1.988994  | 0.701145  |

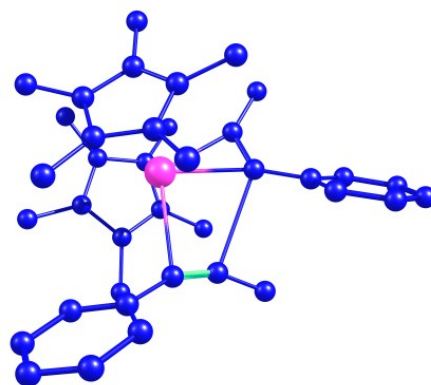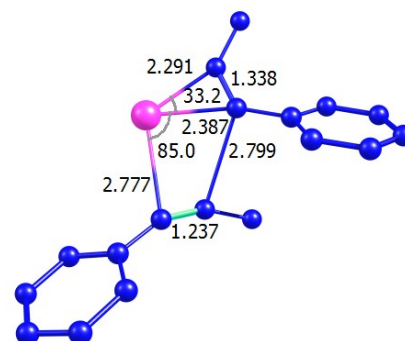



|            |   |           |           |           |                                                                                     |
|------------|---|-----------|-----------|-----------|-------------------------------------------------------------------------------------|
|            | H | -2.704094 | 2.403430  | 1.178738  |                                                                                     |
|            | C | -4.792555 | 2.686427  | 0.747715  |                                                                                     |
|            | H | -4.846475 | 3.632867  | 1.281591  |                                                                                     |
|            | C | -5.923835 | 2.184106  | 0.101463  |                                                                                     |
|            | H | -6.861813 | 2.733060  | 0.127277  |                                                                                     |
|            | C | -5.833636 | 0.971190  | -0.582097 |                                                                                     |
|            | H | -6.705441 | 0.569817  | -1.094627 |                                                                                     |
|            | C | -4.633567 | 0.263389  | -0.608208 |                                                                                     |
|            | H | -4.578206 | -0.680807 | -1.144329 |                                                                                     |
|            | C | -3.002884 | -2.342606 | 0.657412  |                                                                                     |
|            | H | -3.885228 | -1.911036 | 1.152304  |                                                                                     |
|            | H | -3.373266 | -2.886430 | -0.221860 |                                                                                     |
|            | H | -2.569779 | -3.100856 | 1.320901  |                                                                                     |
|            | U | 0.119141  | -0.481336 | 0.025336  |                                                                                     |
| <b>TS6</b> | C | 2.672223  | -1.034865 | -1.730426 |                                                                                     |
|            | C | 1.678011  | -2.015350 | -1.993590 |                                                                                     |
|            | C | 0.570750  | -1.366093 | -2.614274 |                                                                                     |
|            | C | 0.895566  | 0.013352  | -2.756304 |                                                                                     |
|            | C | 2.182459  | 0.222995  | -2.187831 |                                                                                     |
|            | C | 4.095785  | -1.336251 | -1.364894 |                                                                                     |
|            | H | 4.636559  | -0.440385 | -1.050150 |                                                                                     |
|            | H | 4.631789  | -1.745877 | -2.234628 |                                                                                     |
|            | H | 4.186989  | -2.079738 | -0.565258 |                                                                                     |
|            | C | 1.905932  | -3.497167 | -1.906888 |                                                                                     |
|            | H | 2.547989  | -3.833366 | -2.734652 |                                                                                     |
|            | H | 0.973184  | -4.063392 | -1.983131 |                                                                                     |
|            | H | 2.408775  | -3.801996 | -0.981303 |                                                                                     |
|            | C | -0.638758 | -2.045807 | -3.188680 |                                                                                     |
|            | H | -1.518645 | -1.395526 | -3.163048 |                                                                                     |
|            | H | -0.894476 | -2.957880 | -2.638843 |                                                                                     |
|            | H | -0.477314 | -2.333831 | -4.237923 |                                                                                     |
|            | C | 0.117173  | 1.022738  | -3.548302 |                                                                                     |
|            | H | 0.127356  | 2.016490  | -3.090178 |                                                                                     |
|            | H | -0.930155 | 0.729605  | -3.656750 |                                                                                     |
|            | H | 0.533733  | 1.121145  | -4.561734 |                                                                                     |
|            | C | 2.984847  | 1.491315  | -2.266387 |                                                                                     |
|            | H | 2.360129  | 2.340253  | -2.558469 |                                                                                     |
|            | H | 3.783447  | 1.408702  | -3.018034 |                                                                                     |
|            | H | 3.471321  | 1.750628  | -1.318261 |                                                                                     |
|            | C | 2.604680  | 0.114581  | 1.877346  |                                                                                     |
|            | C | 2.096012  | -1.159830 | 2.263802  |                                                                                     |
|            | C | 0.775325  | -0.972416 | 2.762247  |                                                                                     |
|            | C | 0.463206  | 0.414584  | 2.663315  |                                                                                     |
|            | C | 1.599472  | 1.086768  | 2.130688  |                                                                                     |
|            | C | 4.039277  | 0.434406  | 1.573348  |                                                                                     |
|            | H | 4.150196  | 1.179300  | 0.777230  |                                                                                     |
|            | H | 4.605290  | -0.453031 | 1.279523  |                                                                                     |
|            | H | 4.534136  | 0.852895  | 2.462744  |                                                                                     |
|            | C | 2.905737  | -2.425459 | 2.320242  |                                                                                     |
|            | H | 3.310041  | -2.724391 | 1.344640  |                                                                                     |
|            | H | 2.319158  | -3.267056 | 2.701592  |                                                                                     |
|            | H | 3.767387  | -2.310727 | 2.992176  |                                                                                     |
|            | C | -0.062621 | -1.968139 | 3.513795  |                                                                                     |
|            | H | 0.328428  | -2.985909 | 3.427732  |                                                                                     |
|            | H | -1.105601 | -1.987181 | 3.177537  |                                                                                     |
|            | H | -0.076656 | -1.723619 | 4.585404  |                                                                                     |
|            | C | -0.767205 | 1.062312  | 3.227694  |                                                                                     |
|            | H | -0.997892 | 2.006036  | 2.725615  |                                                                                     |
|            | H | -0.645922 | 1.277744  | 4.300028  |                                                                                     |
|            | H | -1.645501 | 0.414649  | 3.132490  |                                                                                     |
|            | C | 1.818141  | 2.568877  | 2.074342  |                                                                                     |
|            | H | 2.432522  | 2.897887  | 2.926159  |                                                                                     |
|            | H | 0.878393  | 3.123771  | 2.109094  |                                                                                     |
|            |   |           |           |           | 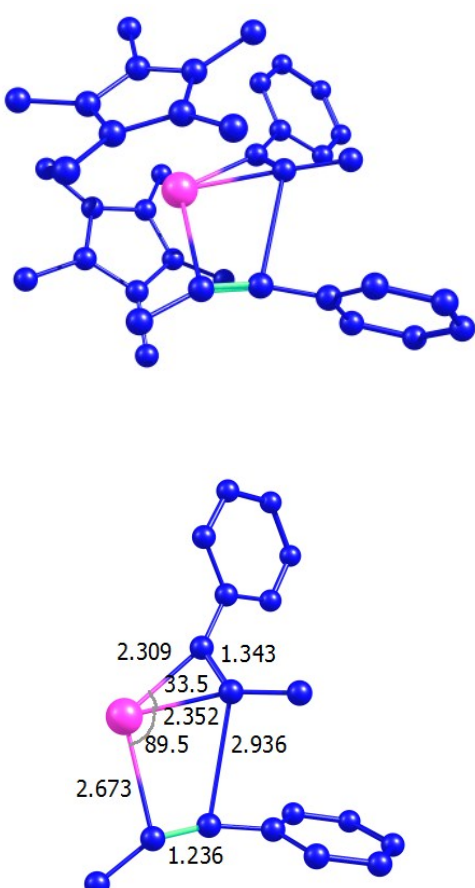 |

|          |   |           |           |           |  |
|----------|---|-----------|-----------|-----------|--|
|          | H | 2.341596  | 2.880726  | 1.163773  |  |
|          | C | -2.016034 | -1.903322 | 0.277685  |  |
|          | C | -0.964208 | -2.538035 | 0.414144  |  |
|          | C | -0.563207 | 1.683978  | -0.215992 |  |
|          | C | -1.411842 | 0.784291  | -0.738807 |  |
|          | C | -4.154721 | -1.974085 | -0.920370 |  |
|          | H | -3.664017 | -2.523777 | -1.717858 |  |
|          | C | -5.516700 | -1.698931 | -0.988430 |  |
|          | H | -6.090625 | -2.037002 | -1.847213 |  |
|          | C | -6.143333 | -0.991554 | 0.038271  |  |
|          | H | -7.206763 | -0.775251 | -0.018955 |  |
|          | C | -5.400502 | -0.564779 | 1.140982  |  |
|          | H | -5.884928 | -0.018213 | 1.945780  |  |
|          | C | -4.038589 | -0.835609 | 1.216530  |  |
|          | H | -3.459694 | -0.500272 | 2.070999  |  |
|          | C | -3.397419 | -1.540623 | 0.183064  |  |
|          | C | -0.189756 | -3.758709 | 0.710314  |  |
|          | H | 0.876106  | -3.571164 | 0.861663  |  |
|          | H | -0.290984 | -4.467874 | -0.117750 |  |
|          | H | -0.582795 | -4.236703 | 1.614482  |  |
|          | C | -0.713985 | 3.138603  | -0.146711 |  |
|          | C | 0.251057  | 4.018611  | -0.672754 |  |
|          | H | 1.143126  | 3.604527  | -1.134730 |  |
|          | C | 0.086352  | 5.399926  | -0.606930 |  |
|          | H | 0.846554  | 6.051907  | -1.032272 |  |
|          | C | -1.035899 | 5.950289  | 0.014326  |  |
|          | H | -1.157182 | 7.028775  | 0.078097  |  |
|          | C | -1.998230 | 5.096964  | 0.555293  |  |
|          | H | -2.879323 | 5.509459  | 1.042707  |  |
|          | C | -1.845743 | 3.714851  | 0.466279  |  |
|          | H | -2.607730 | 3.059668  | 0.881736  |  |
|          | C | -2.697153 | 1.056448  | -1.461497 |  |
|          | H | -3.551152 | 1.026388  | -0.773511 |  |
|          | H | -2.694691 | 2.054777  | -1.922720 |  |
|          | H | -2.912301 | 0.316108  | -2.241247 |  |
|          | U | 0.512155  | -0.348337 | -0.000491 |  |
| <b>6</b> | C | 2.858180  | -1.027699 | -1.703509 |  |
|          | C | 1.783362  | -1.940263 | -1.907576 |  |
|          | C | 0.733343  | -1.244862 | -2.567889 |  |
|          | C | 1.152286  | 0.103130  | -2.768706 |  |
|          | C | 2.463090  | 0.238095  | -2.227792 |  |
|          | C | 4.245678  | -1.411226 | -1.277391 |  |
|          | H | 4.823663  | -0.551759 | -0.927086 |  |
|          | H | 4.800294  | -1.846125 | -2.122044 |  |
|          | H | 4.248109  | -2.162717 | -0.480412 |  |
|          | C | 1.838306  | -3.412240 | -1.616099 |  |
|          | H | 2.405246  | -3.946059 | -2.392453 |  |
|          | H | 0.841143  | -3.859257 | -1.577787 |  |
|          | H | 2.333779  | -3.629471 | -0.662093 |  |
|          | C | -0.509826 | -1.835392 | -3.163464 |  |
|          | H | -1.369601 | -1.166455 | -3.053455 |  |
|          | H | -0.772460 | -2.792324 | -2.704573 |  |
|          | H | -0.373360 | -2.015739 | -4.240142 |  |
|          | C | 0.412105  | 1.094356  | -3.622959 |  |
|          | H | 0.918158  | 2.063222  | -3.659444 |  |
|          | H | -0.612752 | 1.269930  | -3.278389 |  |
|          | H | 0.349456  | 0.730439  | -4.658416 |  |
|          | C | 3.354760  | 1.443249  | -2.338216 |  |
|          | H | 2.786871  | 2.372496  | -2.449558 |  |
|          | H | 4.016590  | 1.367920  | -3.212715 |  |
|          | H | 4.003576  | 1.561883  | -1.462504 |  |
|          | C | 2.770067  | 0.177579  | 1.973313  |  |
|          | C | 2.153074  | -1.067827 | 2.286941  |  |

|   |           |           |           |
|---|-----------|-----------|-----------|
| C | 0.816242  | -0.806436 | 2.703873  |
| C | 0.602719  | 0.600974  | 2.643518  |
| C | 1.804895  | 1.207466  | 2.182449  |
| C | 4.226219  | 0.421811  | 1.700093  |
| H | 4.393062  | 1.138917  | 0.886999  |
| H | 4.757243  | -0.497600 | 1.441408  |
| H | 4.718909  | 0.838982  | 2.589946  |
| C | 2.814318  | -2.416615 | 2.324748  |
| H | 3.754694  | -2.430537 | 1.765453  |
| H | 2.174519  | -3.207410 | 1.913957  |
| H | 3.051754  | -2.710838 | 3.356882  |
| C | -0.118486 | -1.795936 | 3.335351  |
| H | 0.070534  | -2.818586 | 2.995772  |
| H | -1.165938 | -1.565271 | 3.119023  |
| H | -0.001671 | -1.793422 | 4.429306  |
| C | -0.613138 | 1.310702  | 3.161652  |
| H | -0.684336 | 2.328984  | 2.770958  |
| H | -0.584337 | 1.378344  | 4.259208  |
| H | -1.538246 | 0.789404  | 2.892714  |
| C | 2.076155  | 2.681729  | 2.082655  |
| H | 2.494107  | 3.070407  | 3.022784  |
| H | 1.168957  | 3.253333  | 1.866039  |
| H | 2.803885  | 2.913622  | 1.295948  |
| C | -2.157760 | -0.723133 | -0.080752 |
| C | -1.069906 | -1.536840 | 0.114667  |
| C | -0.908782 | 1.466238  | -0.222638 |
| C | -2.081874 | 0.755537  | -0.326997 |
| C | -4.086788 | -2.000037 | -1.117775 |
| H | -3.514399 | -2.070470 | -2.039667 |
| C | -5.351463 | -2.583193 | -1.041751 |
| H | -5.757809 | -3.103197 | -1.906266 |
| C | -6.092967 | -2.501124 | 0.136533  |
| H | -7.078312 | -2.956395 | 0.197075  |
| C | -5.558764 | -1.831295 | 1.237245  |
| H | -6.126539 | -1.763258 | 2.162355  |
| C | -4.295762 | -1.245678 | 1.156141  |
| H | -3.886170 | -0.723915 | 2.018579  |
| C | -3.539469 | -1.317579 | -0.022614 |
| C | -1.254395 | -3.015409 | 0.357730  |
| H | -0.327533 | -3.497234 | 0.689986  |
| H | -1.569706 | -3.535337 | -0.558263 |
| H | -2.027345 | -3.228987 | 1.108887  |
| C | -0.859371 | 2.936256  | -0.260236 |
| C | 0.100236  | 3.619261  | -1.033493 |
| H | 0.765384  | 3.040018  | -1.667397 |
| C | 0.205447  | 5.007803  | -1.018211 |
| H | 0.951265  | 5.497076  | -1.641078 |
| C | -0.635306 | 5.769706  | -0.206218 |
| H | -0.550065 | 6.853168  | -0.186416 |
| C | -1.583348 | 5.118943  | 0.584292  |
| H | -2.243298 | 5.696191  | 1.228424  |
| C | -1.695339 | 3.730733  | 0.555243  |
| H | -2.435073 | 3.241006  | 1.183051  |
| C | -3.394024 | 1.404132  | -0.730901 |
| H | -4.119463 | 1.423408  | 0.092483  |
| H | -3.240266 | 2.429838  | -1.072464 |
| H | -3.871250 | 0.836016  | -1.538533 |
| U | 0.836988  | -0.145053 | 0.000747  |

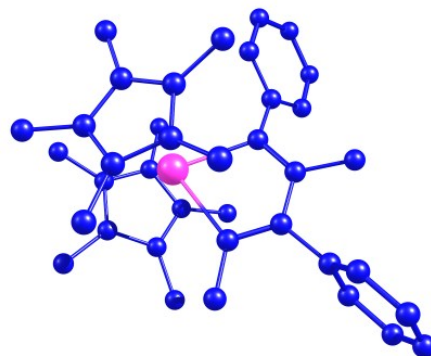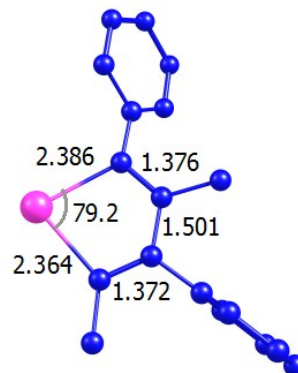

**Table S4.** Frequencies of the stationary points optimized for  $(\eta^5\text{-C}_5\text{Me}_5)_2\text{U}[\eta^2\text{-C(Ph)=C(Me)}]+\text{PhC}\equiv\text{CMe}$ , obtained with B3PW91-PCM method.

| Species                                                                                  | Frequencies (cm <sup>-1</sup> ) |      |      |      |      |      |      |      |      |      |
|------------------------------------------------------------------------------------------|---------------------------------|------|------|------|------|------|------|------|------|------|
| <b><math>(\eta^5\text{-C}_5\text{Me}_5)_2\text{Th}[\eta^2\text{-C(Ph)=C(Me)}]</math></b> | 16                              | 21   | 29   | 38   | 42   | 58   | 64   | 85   | 87   | 94   |
|                                                                                          | 97                              | 102  | 105  | 113  | 118  | 121  | 124  | 128  | 134  | 138  |
|                                                                                          | 140                             | 147  | 151  | 156  | 158  | 162  | 174  | 179  | 186  | 188  |
|                                                                                          | 191                             | 218  | 269  | 279  | 283  | 285  | 288  | 291  | 293  | 295  |
|                                                                                          | 295                             | 297  | 309  | 344  | 364  | 371  | 389  | 391  | 417  | 450  |
|                                                                                          | 521                             | 547  | 548  | 549  | 550  | 555  | 558  | 563  | 601  | 602  |
|                                                                                          | 625                             | 629  | 630  | 632  | 635  | 675  | 712  | 770  | 817  | 819  |
|                                                                                          | 823                             | 823  | 838  | 854  | 919  | 967  | 973  | 973  | 974  | 975  |
|                                                                                          | 979                             | 990  | 1011 | 1025 | 1044 | 1046 | 1050 | 1052 | 1055 | 1058 |
|                                                                                          | 1059                            | 1060 | 1061 | 1063 | 1063 | 1090 | 1092 | 1093 | 1094 | 1104 |
|                                                                                          | 1117                            | 1128 | 1130 | 1185 | 1189 | 1190 | 1191 | 1193 | 1203 | 1243 |
|                                                                                          | 1329                            | 1369 | 1406 | 1422 | 1422 | 1424 | 1425 | 1431 | 1434 | 1436 |
|                                                                                          | 1436                            | 1437 | 1441 | 1450 | 1450 | 1455 | 1457 | 1475 | 1475 | 1484 |
|                                                                                          | 1487                            | 1489 | 1493 | 1493 | 1494 | 1496 | 1498 | 1501 | 1502 | 1504 |
|                                                                                          | 1505                            | 1508 | 1509 | 1509 | 1511 | 1513 | 1518 | 1522 | 1526 | 1529 |
|                                                                                          | 1530                            | 1533 | 1535 | 1539 | 1542 | 1557 | 1558 | 1586 | 1630 | 1660 |
|                                                                                          | 3011                            | 3032 | 3034 | 3034 | 3035 | 3035 | 3035 | 3036 | 3037 | 3038 |
|                                                                                          | 3039                            | 3073 | 3083 | 3084 | 3087 | 3090 | 3091 | 3094 | 3100 | 3101 |
|                                                                                          | 3104                            | 3111 | 3118 | 3126 | 3131 | 3139 | 3141 | 3142 | 3143 | 3144 |
|                                                                                          | 3145                            | 3149 | 3153 | 3182 | 3188 | 3199 | 3210 | 3218 |      |      |
| <b>PhC≡CMe</b>                                                                           | 25                              | 91   | 95   | 248  | 295  | 395  | 404  | 410  | 521  | 547  |
|                                                                                          | 633                             | 705  | 716  | 772  | 856  | 929  | 973  | 998  | 1000 | 1015 |
|                                                                                          | 1057                            | 1060 | 1063 | 1111 | 1191 | 1209 | 1310 | 1337 | 1373 | 1433 |
|                                                                                          | 1489                            | 1494 | 1494 | 1544 | 1637 | 1670 | 2353 | 3047 | 3116 | 3122 |
|                                                                                          | 3197                            | 3205 | 3216 | 3223 | 3228 |      |      |      |      |      |
| <b>TS6a</b>                                                                              | -69                             | 16   | 25   | 32   | 40   | 45   | 59   | 71   | 76   | 81   |
|                                                                                          | 87                              | 90   | 94   | 103  | 103  | 109  | 113  | 116  | 119  | 122  |
|                                                                                          | 125                             | 126  | 131  | 134  | 135  | 145  | 156  | 159  | 163  | 171  |
|                                                                                          | 175                             | 177  | 184  | 187  | 188  | 192  | 199  | 205  | 218  | 226  |
|                                                                                          | 234                             | 245  | 262  | 266  | 266  | 272  | 277  | 283  | 288  | 290  |
|                                                                                          | 290                             | 296  | 300  | 313  | 353  | 364  | 372  | 380  | 387  | 397  |
|                                                                                          | 407                             | 414  | 429  | 471  | 523  | 527  | 536  | 547  | 548  | 548  |
|                                                                                          | 550                             | 553  | 554  | 567  | 606  | 608  | 624  | 629  | 630  | 631  |
|                                                                                          | 632                             | 634  | 653  | 697  | 711  | 729  | 767  | 775  | 816  | 817  |
|                                                                                          | 819                             | 826  | 828  | 846  | 853  | 913  | 927  | 960  | 968  | 969  |
|                                                                                          | 970                             | 976  | 978  | 979  | 984  | 985  | 998  | 1011 | 1015 | 1023 |
|                                                                                          | 1026                            | 1044 | 1045 | 1047 | 1049 | 1053 | 1055 | 1056 | 1060 | 1061 |
|                                                                                          | 1061                            | 1063 | 1063 | 1064 | 1090 | 1091 | 1091 | 1092 | 1102 | 1109 |
|                                                                                          | 1114                            | 1127 | 1128 | 1184 | 1190 | 1191 | 1191 | 1192 | 1193 | 1203 |
|                                                                                          | 1209                            | 1238 | 1276 | 1327 | 1338 | 1370 | 1374 | 1407 | 1413 | 1418 |
|                                                                                          | 1421                            | 1423 | 1424 | 1427 | 1430 | 1432 | 1434 | 1435 | 1440 | 1454 |
|                                                                                          | 1456                            | 1457 | 1458 | 1476 | 1477 | 1479 | 1483 | 1488 | 1488 | 1489 |
|                                                                                          | 1492                            | 1493 | 1498 | 1498 | 1499 | 1503 | 1504 | 1506 | 1507 | 1509 |
|                                                                                          | 1512                            | 1513 | 1514 | 1516 | 1518 | 1521 | 1525 | 1529 | 1530 | 1532 |
|                                                                                          | 1533                            | 1536 | 1538 | 1546 | 1547 | 1555 | 1557 | 1624 | 1631 | 1637 |
|                                                                                          | 1661                            | 1665 | 2133 | 3021 | 3029 | 3029 | 3032 | 3033 | 3033 | 3034 |
|                                                                                          | 3036                            | 3037 | 3038 | 3041 | 3061 | 3086 | 3090 | 3092 | 3094 | 3096 |
|                                                                                          | 3096                            | 3097 | 3100 | 3106 | 3107 | 3111 | 3119 | 3134 | 3137 | 3139 |
| 3147                                                                                     | 3148                            | 3148 | 3149 | 3151 | 3155 | 3158 | 3161 | 3163 | 3182 |      |
| 3189                                                                                     | 3200                            | 3204 | 3209 | 3213 | 3221 | 3226 | 3230 | 3234 |      |      |
| <b>P6a</b>                                                                               | 16                              | 18   | 27   | 30   | 41   | 50   | 51   | 60   | 70   | 77   |
|                                                                                          | 81                              | 85   | 97   | 100  | 102  | 109  | 112  | 118  | 122  | 123  |
|                                                                                          | 128                             | 132  | 136  | 143  | 149  | 153  | 161  | 165  | 167  | 172  |
|                                                                                          | 174                             | 175  | 176  | 186  | 201  | 209  | 214  | 220  | 227  | 245  |
|                                                                                          | 270                             | 271  | 274  | 276  | 278  | 281  | 288  | 291  | 292  | 294  |
|                                                                                          | 299                             | 306  | 322  | 332  | 365  | 374  | 381  | 391  | 401  | 412  |
|                                                                                          | 415                             | 479  | 502  | 546  | 548  | 548  | 549  | 550  | 554  | 555  |

|             |      |      |      |      |      |      |      |      |      |      |
|-------------|------|------|------|------|------|------|------|------|------|------|
|             | 574  | 603  | 603  | 610  | 625  | 627  | 630  | 633  | 635  | 635  |
|             | 673  | 703  | 715  | 717  | 736  | 781  | 788  | 817  | 818  | 823  |
|             | 824  | 845  | 858  | 862  | 927  | 927  | 968  | 970  | 971  | 971  |
|             | 973  | 975  | 976  | 993  | 994  | 998  | 1013 | 1015 | 1016 | 1043 |
|             | 1047 | 1048 | 1050 | 1051 | 1056 | 1057 | 1059 | 1060 | 1061 | 1062 |
|             | 1063 | 1064 | 1083 | 1091 | 1092 | 1093 | 1093 | 1109 | 1110 | 1128 |
|             | 1129 | 1138 | 1142 | 1187 | 1187 | 1189 | 1191 | 1193 | 1194 | 1208 |
|             | 1209 | 1250 | 1283 | 1336 | 1339 | 1370 | 1371 | 1413 | 1415 | 1421 |
|             | 1421 | 1422 | 1424 | 1431 | 1432 | 1434 | 1435 | 1436 | 1441 | 1451 |
|             | 1452 | 1456 | 1458 | 1473 | 1473 | 1480 | 1485 | 1489 | 1489 | 1491 |
|             | 1491 | 1492 | 1494 | 1497 | 1499 | 1501 | 1501 | 1504 | 1505 | 1506 |
|             | 1507 | 1510 | 1511 | 1513 | 1514 | 1519 | 1519 | 1522 | 1529 | 1530 |
|             | 1534 | 1537 | 1537 | 1542 | 1544 | 1546 | 1553 | 1555 | 1567 | 1643 |
|             | 1643 | 1667 | 1667 | 3020 | 3022 | 3035 | 3035 | 3035 | 3036 | 3036 |
|             | 3036 | 3037 | 3037 | 3040 | 3040 | 3077 | 3079 | 3091 | 3092 | 3094 |
|             | 3094 | 3096 | 3097 | 3100 | 3100 | 3109 | 3111 | 3112 | 3112 | 3130 |
|             | 3130 | 3142 | 3143 | 3147 | 3148 | 3149 | 3150 | 3150 | 3151 | 3187 |
|             | 3187 | 3193 | 3194 | 3203 | 3204 | 3209 | 3209 | 3219 | 3219 |      |
| <b>TS6b</b> | -90  | 21   | 26   | 31   | 41   | 42   | 49   | 58   | 64   | 74   |
|             | 80   | 89   | 97   | 100  | 104  | 108  | 110  | 114  | 123  | 130  |
|             | 133  | 137  | 141  | 143  | 150  | 156  | 162  | 164  | 167  | 172  |
|             | 178  | 180  | 186  | 188  | 190  | 192  | 201  | 210  | 216  | 223  |
|             | 232  | 264  | 266  | 272  | 275  | 277  | 283  | 284  | 286  | 289  |
|             | 292  | 300  | 308  | 320  | 353  | 365  | 372  | 379  | 382  | 386  |
|             | 414  | 416  | 434  | 461  | 500  | 519  | 532  | 548  | 549  | 549  |
|             | 549  | 552  | 557  | 574  | 607  | 609  | 621  | 624  | 629  | 630  |
|             | 631  | 632  | 665  | 706  | 711  | 726  | 767  | 770  | 817  | 819  |
|             | 825  | 826  | 832  | 853  | 859  | 916  | 931  | 966  | 967  | 970  |
|             | 977  | 978  | 979  | 984  | 988  | 994  | 1002 | 1009 | 1012 | 1014 |
|             | 1037 | 1046 | 1047 | 1052 | 1053 | 1055 | 1056 | 1059 | 1061 | 1062 |
|             | 1062 | 1063 | 1065 | 1068 | 1087 | 1088 | 1090 | 1092 | 1094 | 1107 |
|             | 1111 | 1123 | 1128 | 1185 | 1187 | 1189 | 1190 | 1192 | 1193 | 1204 |
|             | 1210 | 1240 | 1275 | 1328 | 1339 | 1370 | 1375 | 1406 | 1419 | 1420 |
|             | 1421 | 1423 | 1424 | 1424 | 1430 | 1432 | 1435 | 1436 | 1441 | 1452 |
|             | 1454 | 1456 | 1457 | 1473 | 1478 | 1484 | 1484 | 1487 | 1489 | 1490 |
|             | 1491 | 1492 | 1497 | 1497 | 1501 | 1503 | 1505 | 1507 | 1510 | 1510 |
|             | 1512 | 1514 | 1517 | 1518 | 1521 | 1522 | 1527 | 1528 | 1529 | 1531 |
|             | 1532 | 1534 | 1538 | 1544 | 1549 | 1552 | 1554 | 1620 | 1630 | 1635 |
|             | 1660 | 1664 | 2189 | 3028 | 3029 | 3029 | 3030 | 3031 | 3032 | 3034 |
|             | 3035 | 3036 | 3037 | 3049 | 3061 | 3093 | 3094 | 3096 | 3096 | 3098 |
|             | 3099 | 3100 | 3104 | 3105 | 3107 | 3108 | 3113 | 3125 | 3135 | 3138 |
|             | 3143 | 3145 | 3147 | 3153 | 3155 | 3158 | 3162 | 3164 | 3173 | 3183 |
|             | 3190 | 3201 | 3202 | 3209 | 3213 | 3220 | 3221 | 3229 | 3262 |      |
| <b>P6b</b>  | 16   | 35   | 42   | 44   | 53   | 56   | 64   | 69   | 74   | 81   |
|             | 83   | 86   | 89   | 97   | 102  | 106  | 111  | 115  | 121  | 130  |
|             | 132  | 140  | 146  | 152  | 157  | 160  | 162  | 166  | 168  | 176  |
|             | 184  | 190  | 192  | 194  | 198  | 202  | 206  | 226  | 265  | 268  |
|             | 269  | 273  | 274  | 278  | 285  | 287  | 295  | 298  | 300  | 301  |
|             | 304  | 330  | 365  | 373  | 385  | 395  | 402  | 409  | 426  | 427  |
|             | 430  | 469  | 537  | 543  | 548  | 549  | 550  | 550  | 556  | 559  |
|             | 564  | 603  | 604  | 607  | 620  | 623  | 630  | 631  | 632  | 633  |
|             | 637  | 689  | 715  | 719  | 759  | 771  | 816  | 817  | 820  | 826  |
|             | 828  | 858  | 864  | 867  | 879  | 924  | 930  | 969  | 970  | 972  |
|             | 977  | 980  | 980  | 991  | 994  | 1003 | 1005 | 1013 | 1013 | 1032 |
|             | 1047 | 1048 | 1052 | 1052 | 1054 | 1056 | 1058 | 1062 | 1063 | 1064 |
|             | 1065 | 1065 | 1067 | 1089 | 1090 | 1092 | 1093 | 1107 | 1113 | 1118 |
|             | 1126 | 1127 | 1185 | 1186 | 1189 | 1190 | 1191 | 1194 | 1208 | 1218 |
|             | 1224 | 1258 | 1272 | 1334 | 1341 | 1370 | 1372 | 1412 | 1421 | 1421 |
|             | 1422 | 1424 | 1425 | 1430 | 1433 | 1434 | 1436 | 1439 | 1441 | 1451 |
|             | 1452 | 1458 | 1460 | 1473 | 1474 | 1482 | 1482 | 1487 | 1489 | 1490 |
|             | 1491 | 1491 | 1492 | 1495 | 1499 | 1500 | 1502 | 1503 | 1505 | 1506 |
|             | 1508 | 1509 | 1513 | 1515 | 1517 | 1523 | 1523 | 1527 | 1529 | 1529 |
|             | 1531 | 1532 | 1534 | 1543 | 1544 | 1545 | 1556 | 1557 | 1588 | 1629 |

|             |      |      |      |      |      |      |      |      |      |      |
|-------------|------|------|------|------|------|------|------|------|------|------|
|             | 1629 | 1660 | 1661 | 3032 | 3032 | 3033 | 3034 | 3035 | 3036 | 3038 |
|             | 3041 | 3042 | 3044 | 3046 | 3049 | 3089 | 3090 | 3093 | 3094 | 3095 |
|             | 3098 | 3098 | 3106 | 3107 | 3109 | 3110 | 3114 | 3139 | 3142 | 3148 |
|             | 3149 | 3151 | 3153 | 3155 | 3156 | 3160 | 3161 | 3163 | 3164 | 3187 |
|             | 3187 | 3194 | 3194 | 3212 | 3212 | 3219 | 3219 | 3229 | 3231 |      |
| <b>TS6c</b> | -122 | 14   | 23   | 29   | 37   | 43   | 45   | 55   | 59   | 74   |
|             | 76   | 82   | 84   | 87   | 93   | 99   | 101  | 107  | 110  | 113  |
|             | 117  | 126  | 133  | 138  | 141  | 147  | 149  | 155  | 159  | 166  |
|             | 171  | 176  | 181  | 183  | 191  | 194  | 198  | 201  | 212  | 231  |
|             | 239  | 247  | 262  | 267  | 274  | 280  | 282  | 283  | 285  | 289  |
|             | 302  | 309  | 309  | 313  | 361  | 363  | 373  | 378  | 381  | 388  |
|             | 414  | 417  | 428  | 460  | 492  | 519  | 527  | 546  | 547  | 548  |
|             | 549  | 555  | 559  | 571  | 606  | 610  | 622  | 623  | 625  | 628  |
|             | 631  | 636  | 668  | 705  | 712  | 726  | 766  | 774  | 820  | 821  |
|             | 823  | 825  | 828  | 856  | 856  | 919  | 927  | 967  | 968  | 972  |
|             | 976  | 979  | 982  | 982  | 984  | 991  | 1000 | 1011 | 1014 | 1025 |
|             | 1033 | 1047 | 1048 | 1050 | 1052 | 1055 | 1057 | 1058 | 1058 | 1060 |
|             | 1061 | 1062 | 1063 | 1066 | 1089 | 1091 | 1092 | 1094 | 1101 | 1109 |
|             | 1110 | 1125 | 1129 | 1185 | 1187 | 1190 | 1190 | 1191 | 1194 | 1202 |
|             | 1209 | 1239 | 1270 | 1327 | 1337 | 1368 | 1374 | 1408 | 1415 | 1421 |
|             | 1423 | 1424 | 1425 | 1429 | 1431 | 1434 | 1435 | 1439 | 1443 | 1450 |
|             | 1455 | 1456 | 1456 | 1472 | 1476 | 1479 | 1484 | 1487 | 1488 | 1490 |
|             | 1490 | 1490 | 1492 | 1497 | 1497 | 1501 | 1503 | 1506 | 1508 | 1509 |
|             | 1511 | 1513 | 1514 | 1517 | 1518 | 1520 | 1526 | 1527 | 1529 | 1530 |
|             | 1532 | 1534 | 1537 | 1544 | 1549 | 1551 | 1553 | 1629 | 1630 | 1635 |
|             | 1659 | 1664 | 2172 | 3023 | 3028 | 3030 | 3031 | 3032 | 3032 | 3033 |
|             | 3034 | 3036 | 3036 | 3048 | 3058 | 3088 | 3096 | 3097 | 3100 | 3100 |
|             | 3100 | 3102 | 3105 | 3107 | 3108 | 3109 | 3119 | 3126 | 3138 | 3140 |
|             | 3144 | 3146 | 3150 | 3153 | 3154 | 3156 | 3156 | 3169 | 3179 | 3185 |
|             | 3192 | 3200 | 3206 | 3208 | 3211 | 3219 | 3221 | 3228 | 3258 |      |
| <b>TS6</b>  | -87  | 16   | 20   | 31   | 39   | 48   | 51   | 56   | 57   | 72   |
|             | 78   | 83   | 96   | 97   | 100  | 106  | 116  | 118  | 121  | 128  |
|             | 131  | 140  | 142  | 148  | 154  | 155  | 159  | 160  | 165  | 176  |
|             | 179  | 181  | 185  | 187  | 193  | 208  | 213  | 216  | 222  | 234  |
|             | 242  | 265  | 270  | 272  | 275  | 281  | 282  | 287  | 287  | 288  |
|             | 297  | 301  | 303  | 322  | 347  | 360  | 376  | 378  | 379  | 385  |
|             | 409  | 416  | 425  | 461  | 512  | 525  | 535  | 547  | 548  | 549  |
|             | 549  | 552  | 555  | 568  | 607  | 609  | 622  | 626  | 630  | 631  |
|             | 632  | 635  | 667  | 701  | 713  | 725  | 770  | 771  | 818  | 819  |
|             | 824  | 827  | 839  | 855  | 855  | 918  | 932  | 966  | 968  | 969  |
|             | 975  | 976  | 979  | 981  | 982  | 988  | 1003 | 1011 | 1015 | 1022 |
|             | 1029 | 1044 | 1047 | 1050 | 1053 | 1054 | 1055 | 1056 | 1058 | 1060 |
|             | 1061 | 1062 | 1062 | 1063 | 1091 | 1091 | 1092 | 1093 | 1096 | 1108 |
|             | 1113 | 1127 | 1127 | 1184 | 1190 | 1190 | 1191 | 1192 | 1194 | 1204 |
|             | 1210 | 1239 | 1282 | 1329 | 1339 | 1369 | 1374 | 1407 | 1417 | 1421 |
|             | 1421 | 1422 | 1424 | 1426 | 1431 | 1433 | 1436 | 1437 | 1442 | 1453 |
|             | 1453 | 1457 | 1459 | 1476 | 1476 | 1482 | 1484 | 1488 | 1490 | 1491 |
|             | 1492 | 1494 | 1496 | 1498 | 1500 | 1504 | 1505 | 1505 | 1508 | 1509 |
|             | 1510 | 1513 | 1513 | 1519 | 1522 | 1522 | 1524 | 1528 | 1529 | 1531 |
|             | 1533 | 1536 | 1538 | 1546 | 1549 | 1551 | 1557 | 1614 | 1630 | 1636 |
|             | 1660 | 1665 | 2178 | 3024 | 3029 | 3029 | 3030 | 3031 | 3031 | 3034 |
|             | 3035 | 3036 | 3039 | 3041 | 3066 | 3088 | 3090 | 3093 | 3093 | 3097 |
|             | 3100 | 3100 | 3103 | 3103 | 3105 | 3106 | 3117 | 3134 | 3137 | 3139 |
|             | 3144 | 3144 | 3146 | 3150 | 3156 | 3156 | 3158 | 3161 | 3168 | 3183 |
|             | 3190 | 3202 | 3203 | 3210 | 3212 | 3219 | 3222 | 3230 | 3236 |      |
| <b>6</b>    | 17   | 26   | 33   | 37   | 41   | 45   | 49   | 62   | 71   | 74   |
|             | 76   | 82   | 88   | 92   | 96   | 102  | 107  | 118  | 122  | 125  |
|             | 129  | 131  | 137  | 139  | 147  | 151  | 153  | 155  | 165  | 166  |
|             | 174  | 181  | 185  | 185  | 187  | 193  | 216  | 226  | 233  | 234  |
|             | 268  | 272  | 274  | 276  | 280  | 285  | 287  | 287  | 291  | 294  |
|             | 297  | 307  | 319  | 368  | 373  | 388  | 390  | 399  | 412  | 421  |
|             | 434  | 493  | 505  | 538  | 546  | 548  | 549  | 550  | 554  | 555  |
|             | 559  | 603  | 605  | 605  | 624  | 625  | 627  | 631  | 632  | 634  |

|      |      |      |      |      |      |      |      |      |      |
|------|------|------|------|------|------|------|------|------|------|
| 678  | 693  | 717  | 717  | 738  | 773  | 790  | 816  | 818  | 824  |
| 825  | 859  | 861  | 867  | 924  | 925  | 956  | 970  | 972  | 972  |
| 973  | 978  | 979  | 985  | 992  | 996  | 1001 | 1012 | 1015 | 1045 |
| 1046 | 1047 | 1050 | 1052 | 1054 | 1055 | 1057 | 1058 | 1060 | 1061 |
| 1062 | 1065 | 1066 | 1091 | 1092 | 1093 | 1093 | 1107 | 1109 | 1126 |
| 1127 | 1128 | 1185 | 1188 | 1188 | 1191 | 1192 | 1193 | 1197 | 1208 |
| 1209 | 1241 | 1288 | 1332 | 1335 | 1368 | 1370 | 1410 | 1420 | 1420 |
| 1421 | 1423 | 1424 | 1430 | 1431 | 1434 | 1435 | 1436 | 1441 | 1451 |
| 1453 | 1458 | 1459 | 1473 | 1473 | 1480 | 1484 | 1486 | 1489 | 1490 |
| 1490 | 1493 | 1494 | 1497 | 1498 | 1502 | 1503 | 1503 | 1504 | 1505 |
| 1507 | 1509 | 1511 | 1512 | 1515 | 1515 | 1519 | 1522 | 1527 | 1531 |
| 1531 | 1533 | 1536 | 1539 | 1542 | 1544 | 1554 | 1556 | 1580 | 1629 |
| 1641 | 1660 | 1666 | 3024 | 3034 | 3034 | 3035 | 3035 | 3036 | 3037 |
| 3038 | 3040 | 3040 | 3041 | 3053 | 3082 | 3092 | 3093 | 3096 | 3099 |
| 3101 | 3104 | 3106 | 3107 | 3107 | 3108 | 3109 | 3111 | 3135 | 3137 |
| 3147 | 3147 | 3147 | 3150 | 3151 | 3153 | 3155 | 3155 | 3165 | 3187 |
| 3187 | 3192 | 3193 | 3202 | 3209 | 3210 | 3217 | 3220 | 3224 |      |

**Table S5.** The energies, enthalpies and free energies (in au at 298.15 K) and corresponding relative values (in kcal/mol ) for  $(\eta^5\text{-C}_5\text{Me}_5)_2\text{U}[\eta^2\text{-C(Ph)=C(Me)}]+\text{PhC}\equiv\text{CMe}$ , obtained with B3PW91-PCM method.<sup>a</sup>

| Species                                                                                          | E                   | H                   | G                   |
|--------------------------------------------------------------------------------------------------|---------------------|---------------------|---------------------|
| $(\eta^5\text{-C}_5\text{Me}_5)_2\text{Th}[\eta^2\text{-C(Ph)=C(Me)}]$                           | -1604.064320        | -1604.026306        | -1604.115010        |
| <b>PhC≡CMe</b>                                                                                   | -347.441314         | -347.432004         | -347.461470         |
| $(\eta^5\text{-C}_5\text{Me}_5)_2\text{Th}[\eta^2\text{-C(Ph)=C(Me)}]+\text{PhC}\equiv\text{CM}$ | -1951.505634(0.0)   | -1951.458310(0.0)   | -1951.576480(0.0)   |
| <b>TS6a</b>                                                                                      | -1951.482636(14.4)  | -1951.436469(13.7)  | -1951.540010(22.9)  |
| <b>P6a</b>                                                                                       | -1951.543040(-23.5) | -1951.497021(-24.3) | -1951.600630(-15.2) |
| <b>TS6b</b>                                                                                      | -1951.482431(14.6)  | -1951.436420(13.7)  | -1951.539000(23.5)  |
| <b>P6b</b>                                                                                       | -1951.546489(-25.6) | -1951.501197(-26.9) | -1951.602590(-16.4) |
| <b>TS6c</b>                                                                                      | -1951.484503(13.3)  | -1951.438010(12.7)  | -1951.541650(21.9)  |
| <b>TS6</b>                                                                                       | -1951.485628(12.6)  | -1951.439674(11.7)  | -1951.542540(21.3)  |
| <b>6</b>                                                                                         | -1951.547522(-26.3) | -1951.501468(-27.1) | -1951.604630(-17.7) |

<sup>a</sup> The U was treated with ECP60MWB, in which 60 electrons are in the core region and the corresponding optimized segmented ((14s13p10d8f6g)/[10s9p5d4f3g]) basis set is applied for the valence shells of U.



**Table S6.** The optimized Cartesian Coordinates (in Å) and structures (the hydrogen atoms omitted for clarity) of stationary points for  $(\eta^5\text{-C}_5\text{Me}_5)_2\text{U}[\eta^2\text{-C}(\text{Ph})=\text{C}(\text{SiHMe}_2)]+\text{PhC}\equiv\text{CSiHMe}_2$ , obtained with B3PW91-PCM method.

| Species                                                                                         | Cartesian coordinates |           |           |           |  |
|-------------------------------------------------------------------------------------------------|-----------------------|-----------|-----------|-----------|--|
| $(\eta^5\text{-C}_5\text{Me}_5)_2\text{U}[\eta^2\text{-C}(\text{Ph})=\text{C}(\text{SiHMe}_2)]$ | C                     | -0.700084 | -2.952584 | -1.986830 |  |
|                                                                                                 | C                     | -1.427616 | -1.748235 | -2.210540 |  |
|                                                                                                 | C                     | -0.532380 | -0.794151 | -2.794208 |  |
|                                                                                                 | C                     | 0.743144  | -1.413839 | -2.936238 |  |
|                                                                                                 | C                     | 0.645675  | -2.739825 | -2.423427 |  |
|                                                                                                 | C                     | -1.276488 | -4.272782 | -1.560148 |  |
|                                                                                                 | H                     | -0.552262 | -4.886363 | -1.012055 |  |
|                                                                                                 | H                     | -1.591535 | -4.862827 | -2.432887 |  |
|                                                                                                 | H                     | -2.158845 | -4.153872 | -0.922883 |  |
|                                                                                                 | C                     | -2.909401 | -1.561889 | -2.036211 |  |
|                                                                                                 | H                     | -3.448345 | -1.790276 | -2.966818 |  |
|                                                                                                 | H                     | -3.170888 | -0.531531 | -1.767761 |  |
|                                                                                                 | H                     | -3.319740 | -2.219054 | -1.262022 |  |
|                                                                                                 | C                     | -0.920687 | 0.547143  | -3.348035 |  |
|                                                                                                 | H                     | -0.079607 | 1.247102  | -3.339599 |  |
|                                                                                                 | H                     | -1.739766 | 1.008510  | -2.784498 |  |
|                                                                                                 | H                     | -1.262247 | 0.461613  | -4.390012 |  |
|                                                                                                 | C                     | 1.928602  | -0.813017 | -3.630682 |  |
|                                                                                                 | H                     | 2.868391  | -1.274467 | -3.313437 |  |
|                                                                                                 | H                     | 2.016441  | 0.258284  | -3.427506 |  |
|                                                                                                 | H                     | 1.850420  | -0.939076 | -4.720197 |  |
|                                                                                                 | C                     | 1.714025  | -3.796183 | -2.482550 |  |
|                                                                                                 | H                     | 2.716757  | -3.359192 | -2.522120 |  |
|                                                                                                 | H                     | 1.602367  | -4.424784 | -3.377633 |  |
|                                                                                                 | H                     | 1.682218  | -4.472411 | -1.619402 |  |
|                                                                                                 | C                     | 0.148453  | -2.582159 | 2.254540  |  |
|                                                                                                 | C                     | -1.146763 | -2.009213 | 2.085411  |  |
|                                                                                                 | C                     | -1.029224 | -0.597312 | 2.276900  |  |
|                                                                                                 | C                     | 0.333032  | -0.301335 | 2.579049  |  |
|                                                                                                 | C                     | 1.067050  | -1.525818 | 2.555709  |  |
|                                                                                                 | C                     | 0.470193  | -4.050831 | 2.280774  |  |
|                                                                                                 | H                     | 1.485381  | -4.259227 | 1.922882  |  |
|                                                                                                 | H                     | -0.223017 | -4.638580 | 1.669318  |  |
|                                                                                                 | H                     | 0.409886  | -4.449757 | 3.303324  |  |
|                                                                                                 | C                     | -2.434209 | -2.765051 | 1.918767  |  |
|                                                                                                 | H                     | -3.169088 | -2.211927 | 1.322919  |  |
|                                                                                                 | H                     | -2.903140 | -2.964869 | 2.892965  |  |
|                                                                                                 | H                     | -2.282110 | -3.735286 | 1.435027  |  |
|                                                                                                 | C                     | -2.172374 | 0.378890  | 2.299606  |  |
|                                                                                                 | H                     | -2.991317 | 0.072756  | 1.638570  |  |
|                                                                                                 | H                     | -1.863077 | 1.385746  | 1.998354  |  |
|                                                                                                 | H                     | -2.598450 | 0.466709  | 3.309170  |  |
|                                                                                                 | C                     | 0.884456  | 1.026863  | 3.004233  |  |
| H                                                                                               | 1.889814              | 1.193776  | 2.605435  |           |  |
| H                                                                                               | 0.946521              | 1.093092  | 4.100126  |           |  |
| H                                                                                               | 0.258668              | 1.857967  | 2.663948  |           |  |
| C                                                                                               | 2.499193              | -1.689371 | 2.979586  |           |  |
| H                                                                                               | 2.580007              | -1.772512 | 4.073470  |           |  |
| H                                                                                               | 3.115293              | -0.840631 | 2.668033  |           |  |
| H                                                                                               | 2.953364              | -2.591793 | 2.556686  |           |  |
| C                                                                                               | 2.536032              | -0.008805 | -0.274928 |           |  |
| C                                                                                               | 1.633508              | 0.985346  | -0.358275 |           |  |
| C                                                                                               | 4.002866              | -0.024834 | -0.237802 |           |  |
| C                                                                                               | 4.712227              | -1.180105 | -0.612389 |           |  |
| H                                                                                               | 4.148450              | -2.054670 | -0.930260 |           |  |
| C                                                                                               | 6.104064              | -1.221712 | -0.586320 |           |  |
| H                                                                                               | 6.624462              | -2.125887 | -0.894409 |           |  |

|                               |                                                                                                                                                                                                                                                                                                                                                                                                                                                                                                                                                                                                                                                                                                                                                                                                     |                                                                                       |
|-------------------------------|-----------------------------------------------------------------------------------------------------------------------------------------------------------------------------------------------------------------------------------------------------------------------------------------------------------------------------------------------------------------------------------------------------------------------------------------------------------------------------------------------------------------------------------------------------------------------------------------------------------------------------------------------------------------------------------------------------------------------------------------------------------------------------------------------------|---------------------------------------------------------------------------------------|
|                               | C 6.829616 -0.111802 -0.151777<br>H 7.915862 -0.144248 -0.118806<br>C 6.146309 1.037655 0.250087<br>H 6.701154 1.905027 0.601256<br>C 4.755584 1.081837 0.202485<br>H 4.233701 1.979187 0.524575<br>Si 1.670786 2.826813 -0.575539<br>H 2.346341 3.491586 0.594243<br>C 2.600225 3.365338 -2.138730<br>H 3.630792 2.993712 -2.134263<br>H 2.631694 4.459028 -2.219120<br>H 2.110913 2.978617 -3.040871<br>C -0.080464 3.546762 -0.634597<br>H -0.642232 3.158664 -1.492866<br>H -0.053253 4.639967 -0.720966<br>H -0.642697 3.299742 0.274043<br>U 0.379056 -1.090166 -0.133072                                                                                                                                                                                                                     |                                                                                       |
| <b>PhC≡CSiHMe<sub>2</sub></b> | C 1.177608 -0.269515 -0.010329<br>C -0.040992 -0.171909 -0.007529<br>C -1.462807 -0.063100 -0.004715<br>C -2.082175 1.197563 -0.088286<br>H -1.464988 2.088730 -0.154979<br>C -3.469565 1.297983 -0.085330<br>H -3.937689 2.276694 -0.150394<br>C -4.258072 0.149478 0.000480<br>H -5.341757 0.231928 0.002542<br>C -3.652026 -1.105108 0.083726<br>H -4.262422 -2.001869 0.150627<br>C -2.265435 -1.215668 0.081460<br>H -1.789631 -2.189786 0.145969<br>Si 3.007656 -0.400220 -0.014171<br>C 3.708972 0.435502 -1.550046<br>C 3.710940 0.357014 1.561074<br>H 3.340178 -1.856142 -0.050857<br>H 3.468638 1.504656 -1.561289<br>H 3.304992 -0.012066 -2.464497<br>H 3.471391 1.424417 1.626025<br>H 3.307277 -0.135509 2.452263<br>H 4.800522 0.333375 -1.575771<br>H 4.802429 0.252785 1.580728   | 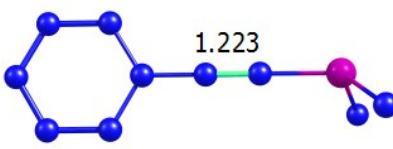    |
| <b>TS7</b>                    | C 1.315590 0.210435 -2.746174<br>C 2.619869 0.221156 -2.156293<br>C 2.931586 -1.112837 -1.768621<br>C 1.816343 -1.945611 -2.097241<br>C 0.829004 -1.124951 -2.721152<br>C 0.660827 1.367382 -3.443791<br>H 0.779822 2.306590 -2.896371<br>H -0.413870 1.204996 -3.573562<br>H 1.088459 1.514965 -4.446038<br>C 3.601038 1.356560 -2.199126<br>H 4.256248 1.273915 -3.079260<br>H 4.252924 1.384269 -1.319187<br>H 3.101817 2.326777 -2.266323<br>C 4.296879 -1.608262 -1.391468<br>H 4.257958 -2.542577 -0.824954<br>H 4.861845 -0.879066 -0.801966<br>H 4.888684 -1.808451 -2.296984<br>C 1.809366 -3.445195 -2.036350<br>H 2.312328 -3.878244 -2.913761<br>H 0.792057 -3.842475 -2.013895<br>H 2.325058 -3.827463 -1.148914<br>C -0.419498 -1.623371 -3.381962<br>H -1.162160 -0.828662 -3.503771 |  |

|   |           |           |           |
|---|-----------|-----------|-----------|
| H | -0.890070 | -2.421414 | -2.802519 |
| H | -0.200800 | -2.022084 | -4.383327 |
| C | 1.664975  | 0.793531  | 2.549781  |
| C | 2.825093  | 0.111789  | 2.088375  |
| C | 2.544447  | -1.291602 | 2.114122  |
| C | 1.217385  | -1.466892 | 2.611994  |
| C | 0.664222  | -0.178229 | 2.858195  |
| C | 1.583400  | 2.246884  | 2.909684  |
| H | 0.605666  | 2.680923  | 2.677522  |
| H | 2.344846  | 2.837619  | 2.391813  |
| H | 1.751153  | 2.383664  | 3.988198  |
| C | 4.164353  | 0.741075  | 1.831548  |
| H | 4.739217  | 0.839637  | 2.764089  |
| H | 4.079008  | 1.745667  | 1.402823  |
| H | 4.774358  | 0.144208  | 1.146852  |
| C | 3.545333  | -2.402029 | 1.962024  |
| H | 3.855444  | -2.775612 | 2.948559  |
| H | 4.450755  | -2.070310 | 1.447831  |
| H | 3.144685  | -3.260891 | 1.411330  |
| C | 0.620059  | -2.768513 | 3.047043  |
| H | 0.982739  | -3.610671 | 2.451502  |
| H | -0.470122 | -2.757114 | 2.969126  |
| H | 0.871672  | -2.975772 | 4.098121  |
| C | -0.641603 | 0.103166  | 3.544143  |
| H | -1.375252 | -0.684947 | 3.350232  |
| H | -1.083726 | 1.050232  | 3.215677  |
| H | -0.511961 | 0.168396  | 4.634977  |
| C | -0.821857 | -2.130661 | 0.085266  |
| C | -1.548527 | -1.008819 | -0.016544 |
| C | -0.927422 | 2.820618  | -0.123266 |
| C | 0.296178  | 2.977278  | -0.165059 |
| C | -2.072173 | -4.645580 | -1.374870 |
| H | -2.353632 | -5.692519 | -1.201636 |
| H | -1.356499 | -4.631335 | -2.203972 |
| H | -2.970602 | -4.104997 | -1.693435 |
| C | -2.714224 | -4.168659 | 1.554112  |
| H | -3.603962 | -3.574121 | 1.318404  |
| H | -2.377783 | -3.881278 | 2.555856  |
| H | -3.009998 | -5.225028 | 1.591187  |
| C | -3.004758 | -0.854836 | -0.102385 |
| C | -3.702744 | -1.179179 | -1.282668 |
| H | -3.139782 | -1.510804 | -2.150650 |
| C | -5.092475 | -1.099858 | -1.349075 |
| H | -5.600446 | -1.368877 | -2.273368 |
| C | -5.831777 | -0.694706 | -0.237821 |
| H | -6.916904 | -0.644005 | -0.284462 |
| C | -5.155720 | -0.353183 | 0.934695  |
| H | -5.715761 | -0.031435 | 1.810338  |
| C | -3.766228 | -0.417586 | 0.997537  |
| H | -3.254144 | -0.145558 | 1.916224  |
| C | -2.350826 | 2.841045  | -0.066498 |
| C | -3.126981 | 2.536960  | -1.198933 |
| H | -2.637843 | 2.180985  | -2.099778 |
| C | -4.505904 | 2.700336  | -1.160940 |
| H | -5.099591 | 2.458440  | -2.037448 |
| C | -5.127575 | 3.164915  | -0.001163 |
| H | -6.206459 | 3.292296  | 0.021846  |
| C | -4.366017 | 3.460362  | 1.130168  |
| H | -4.848725 | 3.820345  | 2.034798  |
| C | -2.985847 | 3.298526  | 1.103899  |
| H | -2.385122 | 3.539172  | 1.976133  |
| C | 1.749935  | 5.006523  | -1.947180 |
| H | 0.798736  | 5.504953  | -2.166067 |

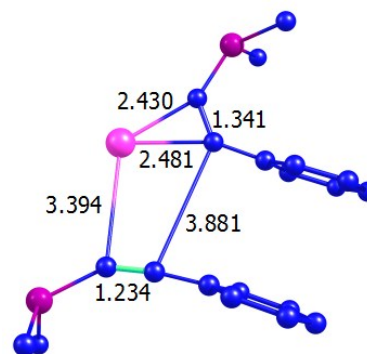

|   |    |           |           |           |  |
|---|----|-----------|-----------|-----------|--|
|   | H  | 1.953308  | 4.298285  | -2.755680 |  |
|   | H  | 2.540500  | 5.766993  | -1.961192 |  |
|   | C  | 1.382288  | 5.532260  | 1.053069  |  |
|   | H  | 2.194700  | 6.269075  | 1.033650  |  |
|   | H  | 1.322014  | 5.120020  | 2.064552  |  |
|   | H  | 0.443988  | 6.058299  | 0.843087  |  |
|   | Si | -1.376347 | -3.908990 | 0.232877  |  |
|   | H  | -0.205121 | -4.772031 | 0.603970  |  |
|   | Si | 1.690701  | 4.200582  | -0.244037 |  |
|   | H  | 2.979750  | 3.511876  | 0.034925  |  |
|   | U  | 0.847194  | -0.365947 | 0.030800  |  |
| 7 | C  | 1.408965  | -0.274322 | -2.745274 |  |
|   | C  | 2.730593  | 0.038550  | -2.310713 |  |
|   | C  | 3.323403  | -1.155779 | -1.800378 |  |
|   | C  | 2.364697  | -2.209703 | -1.916436 |  |
|   | C  | 1.184912  | -1.664391 | -2.503202 |  |
|   | C  | 0.486376  | 0.609671  | -3.530443 |  |
|   | H  | 0.754338  | 1.663875  | -3.432958 |  |
|   | H  | -0.555494 | 0.506403  | -3.209174 |  |
|   | H  | 0.526238  | 0.357465  | -4.599979 |  |
|   | C  | 3.456610  | 1.337373  | -2.517233 |  |
|   | H  | 3.906753  | 1.378662  | -3.519524 |  |
|   | H  | 4.272069  | 1.469782  | -1.797850 |  |
|   | H  | 2.797273  | 2.204593  | -2.423869 |  |
|   | C  | 4.774670  | -1.314188 | -1.448975 |  |
|   | H  | 4.962013  | -2.227578 | -0.878368 |  |
|   | H  | 5.164020  | -0.472278 | -0.865331 |  |
|   | H  | 5.385086  | -1.374778 | -2.361130 |  |
|   | C  | 2.606342  | -3.666744 | -1.639617 |  |
|   | H  | 2.945299  | -4.188763 | -2.545765 |  |
|   | H  | 1.698368  | -4.176297 | -1.298298 |  |
|   | H  | 3.378146  | -3.821195 | -0.878051 |  |
|   | C  | 0.018759  | -2.445567 | -3.028193 |  |
|   | H  | -0.905929 | -1.861952 | -2.996440 |  |
|   | H  | -0.150647 | -3.365950 | -2.462022 |  |
|   | H  | 0.188955  | -2.734239 | -4.075916 |  |
|   | C  | 1.768727  | 0.546679  | 2.697901  |  |
|   | C  | 3.051012  | 0.117068  | 2.244091  |  |
|   | C  | 3.035424  | -1.309666 | 2.174793  |  |
|   | C  | 1.741870  | -1.758857 | 2.579275  |  |
|   | C  | 0.958236  | -0.612215 | 2.903208  |  |
|   | C  | 1.410657  | 1.930730  | 3.148512  |  |
|   | H  | 0.342789  | 2.132937  | 3.025224  |  |
|   | H  | 1.959729  | 2.700592  | 2.599152  |  |
|   | H  | 1.646486  | 2.060617  | 4.214996  |  |
|   | C  | 4.249140  | 1.002461  | 2.045370  |  |
|   | H  | 4.791334  | 1.149517  | 2.990254  |  |
|   | H  | 3.968675  | 1.996224  | 1.679233  |  |
|   | H  | 4.964396  | 0.578097  | 1.332196  |  |
|   | C  | 4.222648  | -2.202619 | 1.958633  |  |
|   | H  | 4.615900  | -2.557456 | 2.921958  |  |
|   | H  | 5.040383  | -1.684136 | 1.450835  |  |
|   | H  | 3.977452  | -3.095151 | 1.371456  |  |
|   | C  | 1.369108  | -3.196551 | 2.799214  |  |
|   | H  | 1.829874  | -3.862159 | 2.060496  |  |
|   | H  | 0.289325  | -3.355619 | 2.751275  |  |
|   | H  | 1.704680  | -3.539446 | 3.788639  |  |
|   | C  | -0.391886 | -0.595173 | 3.555954  |  |
|   | H  | -0.932764 | -1.531265 | 3.401660  |  |
|   | H  | -1.022684 | 0.212531  | 3.170198  |  |
|   | H  | -0.295852 | -0.444799 | 4.641012  |  |
|   | C  | -1.116578 | -1.172617 | 0.093777  |  |
|   | C  | -1.914213 | -0.070038 | -0.060551 |  |

|             |    |           |           |           |  |
|-------------|----|-----------|-----------|-----------|--|
|             | C  | -1.372148 | 1.336628  | -0.157245 |  |
|             | C  | -0.033569 | 1.624809  | -0.161817 |  |
|             | C  | -3.008640 | -3.460232 | -1.185020 |  |
|             | H  | -3.112857 | -4.553008 | -1.167481 |  |
|             | H  | -2.704719 | -3.167697 | -2.194300 |  |
|             | H  | -3.993775 | -3.022794 | -0.992072 |  |
|             | C  | -2.529139 | -3.520885 | 1.787923  |  |
|             | H  | -3.522504 | -3.081122 | 1.926747  |  |
|             | H  | -1.931093 | -3.286509 | 2.673545  |  |
|             | H  | -2.649366 | -4.611337 | 1.749800  |  |
|             | C  | -3.408021 | -0.209872 | -0.168423 |  |
|             | C  | -4.058980 | -0.070606 | -1.402825 |  |
|             | H  | -3.475483 | 0.170320  | -2.288027 |  |
|             | C  | -5.436288 | -0.248642 | -1.511333 |  |
|             | H  | -5.918373 | -0.146481 | -2.480829 |  |
|             | C  | -6.196747 | -0.555152 | -0.381812 |  |
|             | H  | -7.272231 | -0.690223 | -0.465510 |  |
|             | C  | -5.566430 | -0.678974 | 0.855594  |  |
|             | H  | -6.150021 | -0.906215 | 1.744827  |  |
|             | C  | -4.185668 | -0.507156 | 0.958894  |  |
|             | H  | -3.699852 | -0.596436 | 1.927412  |  |
|             | C  | -2.391810 | 2.439789  | -0.231116 |  |
|             | C  | -2.601719 | 3.140435  | -1.426519 |  |
|             | H  | -2.051255 | 2.843946  | -2.315861 |  |
|             | C  | -3.508725 | 4.198592  | -1.491026 |  |
|             | H  | -3.657447 | 4.725331  | -2.430926 |  |
|             | C  | -4.224388 | 4.577157  | -0.356108 |  |
|             | H  | -4.929417 | 5.403413  | -0.402542 |  |
|             | C  | -4.033435 | 3.881588  | 0.838861  |  |
|             | H  | -4.588456 | 4.167103  | 1.729460  |  |
|             | C  | -3.132757 | 2.820439  | 0.897209  |  |
|             | H  | -2.991002 | 2.284429  | 1.832310  |  |
|             | C  | 0.711538  | 4.261767  | -1.867434 |  |
|             | H  | -0.290872 | 4.594206  | -2.156271 |  |
|             | H  | 1.113915  | 3.656713  | -2.685354 |  |
|             | H  | 1.345364  | 5.152951  | -1.772624 |  |
|             | C  | -0.055517 | 4.621277  | 1.031663  |  |
|             | H  | 0.605287  | 5.496198  | 1.086112  |  |
|             | H  | -0.163417 | 4.217315  | 2.042555  |  |
|             | H  | -1.042241 | 4.961614  | 0.700535  |  |
|             | Si | -1.763655 | -2.935023 | 0.148894  |  |
|             | H  | -0.549701 | -3.806887 | -0.045496 |  |
|             | Si | 0.670418  | 3.364585  | -0.191133 |  |
|             | H  | 2.122523  | 3.201155  | 0.183015  |  |
|             | U  | 1.296550  | -0.479082 | 0.083029  |  |
| <b>TS7a</b> | C  | -0.691272 | -2.712128 | -1.715834 |  |
|             | C  | -1.579951 | -1.670710 | -2.093515 |  |
|             | C  | -0.809083 | -0.641875 | -2.724492 |  |
|             | C  | 0.550602  | -1.061150 | -2.747494 |  |
|             | C  | 0.633270  | -2.333324 | -2.106941 |  |
|             | C  | -1.134314 | -4.097056 | -1.346009 |  |
|             | H  | -0.312892 | -4.705512 | -0.961428 |  |
|             | H  | -1.528577 | -4.612122 | -2.235015 |  |
|             | H  | -1.936119 | -4.102919 | -0.599304 |  |
|             | C  | -3.074113 | -1.811331 | -2.119872 |  |
|             | H  | -3.373501 | -2.508118 | -2.917125 |  |
|             | H  | -3.574835 | -0.860861 | -2.315120 |  |
|             | H  | -3.480876 | -2.208173 | -1.183301 |  |
|             | C  | -1.378321 | 0.541225  | -3.451301 |  |
|             | H  | -0.661669 | 1.362494  | -3.525087 |  |
|             | H  | -2.274654 | 0.930317  | -2.959426 |  |
|             | H  | -1.667205 | 0.267691  | -4.476826 |  |
|             | C  | 1.666744  | -0.364349 | -3.464369 |  |

|    |           |           |           |
|----|-----------|-----------|-----------|
| H  | 2.632877  | -0.517218 | -2.974329 |
| H  | 1.500665  | 0.715668  | -3.511216 |
| H  | 1.754058  | -0.728940 | -4.498221 |
| C  | 1.813783  | -3.262976 | -2.135225 |
| H  | 2.733788  | -2.736239 | -2.402324 |
| H  | 1.668424  | -4.048207 | -2.891404 |
| H  | 1.988258  | -3.772791 | -1.180584 |
| C  | 0.110065  | -2.684065 | 1.972119  |
| C  | -1.062914 | -1.964874 | 2.345572  |
| C  | -0.649510 | -0.692480 | 2.850704  |
| C  | 0.772095  | -0.627940 | 2.777109  |
| C  | 1.241739  | -1.856215 | 2.220230  |
| C  | 0.178324  | -4.162392 | 1.723547  |
| H  | 0.940050  | -4.437413 | 0.986318  |
| H  | -0.777430 | -4.569701 | 1.385789  |
| H  | 0.441413  | -4.684440 | 2.655625  |
| C  | -2.435327 | -2.570133 | 2.456645  |
| H  | -2.860721 | -2.879629 | 1.493261  |
| H  | -3.139907 | -1.873777 | 2.922140  |
| H  | -2.415482 | -3.464969 | 3.093879  |
| C  | -1.534985 | 0.294429  | 3.555361  |
| H  | -2.511668 | 0.409251  | 3.074301  |
| H  | -1.080515 | 1.288612  | 3.593556  |
| H  | -1.716864 | -0.018135 | 4.593792  |
| C  | 1.665695  | 0.407304  | 3.393384  |
| H  | 2.508437  | 0.662810  | 2.742860  |
| H  | 2.089236  | 0.035813  | 4.338056  |
| H  | 1.129687  | 1.330717  | 3.623373  |
| C  | 2.665190  | -2.330322 | 2.223504  |
| H  | 2.914571  | -2.786487 | 3.193868  |
| H  | 3.376944  | -1.520134 | 2.048989  |
| H  | 2.845752  | -3.094176 | 1.459145  |
| C  | -2.387778 | 1.276309  | 0.188264  |
| C  | -1.428024 | 1.991003  | 0.533634  |
| C  | 2.252779  | 0.427380  | -0.207190 |
| C  | 1.498412  | 1.456136  | -0.560462 |
| C  | -4.434953 | -0.067045 | 0.627443  |
| H  | -3.933876 | -0.559444 | 1.451831  |
| C  | -5.762056 | -0.360231 | 0.332278  |
| H  | -6.295314 | -1.091460 | 0.934028  |
| C  | -6.407911 | 0.281102  | -0.725803 |
| H  | -7.443963 | 0.047923  | -0.955537 |
| C  | -5.717660 | 1.229493  | -1.482812 |
| H  | -6.216031 | 1.742361  | -2.301217 |
| C  | -4.390548 | 1.530244  | -1.193910 |
| H  | -3.859771 | 2.280360  | -1.772365 |
| C  | -3.727493 | 0.878418  | -0.133759 |
| Si | -0.996588 | 3.688650  | 1.176103  |
| H  | -0.727893 | 4.516359  | -0.030288 |
| C  | 0.467039  | 3.758741  | 2.347845  |
| H  | 0.189382  | 3.443363  | 3.359442  |
| H  | 0.826375  | 4.792968  | 2.409890  |
| H  | 1.292496  | 3.135209  | 1.996171  |
| C  | -2.548703 | 4.349725  | 2.024109  |
| H  | -2.812247 | 3.745855  | 2.899726  |
| H  | -3.406029 | 4.350572  | 1.342585  |
| H  | -2.381734 | 5.380080  | 2.362116  |
| C  | 3.697961  | 0.258371  | -0.030214 |
| C  | 4.393617  | -0.872685 | -0.489609 |
| H  | 3.839250  | -1.660752 | -0.988573 |
| C  | 5.768659  | -1.000839 | -0.310382 |
| H  | 6.280122  | -1.882072 | -0.691370 |
| C  | 6.486972  | -0.015477 | 0.368369  |

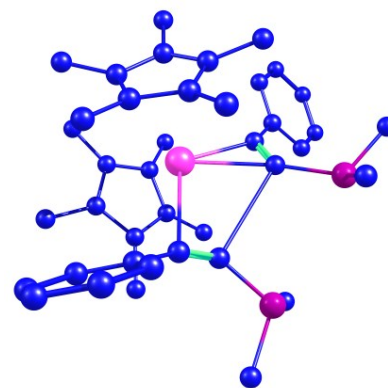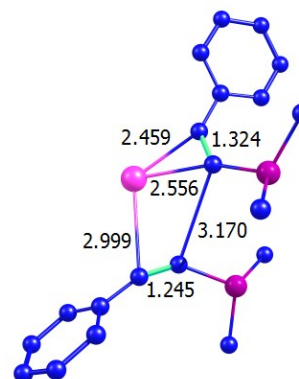

|            |    |           |           |           |                                                                                     |
|------------|----|-----------|-----------|-----------|-------------------------------------------------------------------------------------|
|            | H  | 7.557951  | -0.121996 | 0.521184  |                                                                                     |
|            | C  | 5.811046  | 1.103202  | 0.858435  |                                                                                     |
|            | H  | 6.355166  | 1.876194  | 1.396841  |                                                                                     |
|            | C  | 4.439590  | 1.241165  | 0.656845  |                                                                                     |
|            | H  | 3.920341  | 2.117512  | 1.037490  |                                                                                     |
|            | Si | 1.915179  | 3.115813  | -1.296565 |                                                                                     |
|            | H  | 1.949189  | 4.148443  | -0.207064 |                                                                                     |
|            | C  | 3.598318  | 3.174670  | -2.170014 |                                                                                     |
|            | H  | 4.429852  | 2.975910  | -1.487738 |                                                                                     |
|            | H  | 3.747625  | 4.166077  | -2.617180 |                                                                                     |
|            | H  | 3.647719  | 2.434022  | -2.977006 |                                                                                     |
|            | C  | 0.640272  | 3.703600  | -2.568374 |                                                                                     |
|            | H  | 0.765159  | 3.176711  | -3.522256 |                                                                                     |
|            | H  | 0.776116  | 4.773982  | -2.767652 |                                                                                     |
|            | H  | -0.387735 | 3.550220  | -2.226691 |                                                                                     |
|            | U  | -0.000080 | -0.530644 | 0.023194  |                                                                                     |
| <b>P7a</b> | C  | -0.441928 | -3.085177 | -1.899846 |                                                                                     |
|            | C  | -1.449037 | -2.110818 | -2.166735 |                                                                                     |
|            | C  | -0.811184 | -0.956570 | -2.707711 |                                                                                     |
|            | C  | 0.592634  | -1.218187 | -2.787065 |                                                                                     |
|            | C  | 0.821815  | -2.534049 | -2.281973 |                                                                                     |
|            | C  | -0.695969 | -4.521674 | -1.544457 |                                                                                     |
|            | H  | 0.181936  | -4.998213 | -1.099585 |                                                                                     |
|            | H  | -0.953325 | -5.098766 | -2.444275 |                                                                                     |
|            | H  | -1.531169 | -4.642469 | -0.845159 |                                                                                     |
|            | C  | -2.930851 | -2.328065 | -2.046721 |                                                                                     |
|            | H  | -3.340228 | -2.746319 | -2.977446 |                                                                                     |
|            | H  | -3.469126 | -1.397914 | -1.841751 |                                                                                     |
|            | H  | -3.180062 | -3.034691 | -1.246696 |                                                                                     |
|            | C  | -1.490397 | 0.226064  | -3.328186 |                                                                                     |
|            | H  | -0.958292 | 1.158900  | -3.119237 |                                                                                     |
|            | H  | -2.514049 | 0.343793  | -2.964221 |                                                                                     |
|            | H  | -1.537306 | 0.111344  | -4.421302 |                                                                                     |
|            | C  | 1.560210  | -0.346012 | -3.536841 |                                                                                     |
|            | H  | 2.573325  | -0.757297 | -3.532469 |                                                                                     |
|            | H  | 1.616938  | 0.670672  | -3.132818 |                                                                                     |
|            | H  | 1.253392  | -0.262832 | -4.588762 |                                                                                     |
|            | C  | 2.109799  | -3.307502 | -2.340839 |                                                                                     |
|            | H  | 2.983568  | -2.653881 | -2.418725 |                                                                                     |
|            | H  | 2.126789  | -3.968866 | -3.218486 |                                                                                     |
|            | H  | 2.257243  | -3.945392 | -1.461737 |                                                                                     |
|            | C  | 0.463974  | -3.002255 | 2.012976  |                                                                                     |
|            | C  | -0.786799 | -2.406824 | 2.372245  |                                                                                     |
|            | C  | -0.527053 | -1.072420 | 2.811727  |                                                                                     |
|            | C  | 0.880155  | -0.841568 | 2.705310  |                                                                                     |
|            | C  | 1.491248  | -2.034310 | 2.219059  |                                                                                     |
|            | C  | 0.680890  | -4.461220 | 1.733276  |                                                                                     |
|            | H  | 1.539608  | -4.642742 | 1.077293  |                                                                                     |
|            | H  | -0.194113 | -4.929261 | 1.273704  |                                                                                     |
|            | H  | 0.879515  | -5.003261 | 2.669123  |                                                                                     |
|            | C  | -2.088816 | -3.151268 | 2.475392  |                                                                                     |
|            | H  | -2.267876 | -3.803376 | 1.612514  |                                                                                     |
|            | H  | -2.946566 | -2.477101 | 2.556408  |                                                                                     |
|            | H  | -2.102021 | -3.793878 | 3.366857  |                                                                                     |
|            | C  | -1.470157 | -0.146367 | 3.526858  |                                                                                     |
|            | H  | -2.497795 | -0.519751 | 3.523859  |                                                                                     |
|            | H  | -1.482826 | 0.858575  | 3.091430  |                                                                                     |
|            | H  | -1.171232 | -0.042272 | 4.579188  |                                                                                     |
|            | C  | 1.592965  | 0.356535  | 3.255917  |                                                                                     |
|            | H  | 2.586247  | 0.477963  | 2.815967  |                                                                                     |
|            | H  | 1.722041  | 0.259331  | 4.344212  |                                                                                     |
|            | H  | 1.037679  | 1.281374  | 3.074032  |                                                                                     |
|            | C  | 2.968760  | -2.277702 | 2.098640  |                                                                                     |
|            |    |           |           |           | 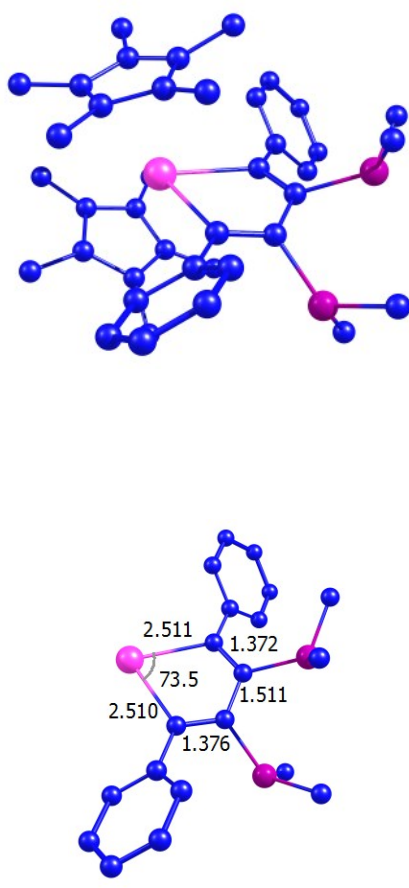 |

|             |    |           |           |           |  |
|-------------|----|-----------|-----------|-----------|--|
|             | H  | 3.396645  | -2.567266 | 3.068993  |  |
|             | H  | 3.508448  | -1.388294 | 1.757967  |  |
|             | H  | 3.194875  | -3.088871 | 1.397510  |  |
|             | C  | -1.484999 | 0.987245  | 0.016825  |  |
|             | C  | -0.725053 | 2.129316  | 0.059172  |  |
|             | C  | 1.516136  | 0.974633  | -0.113401 |  |
|             | C  | 0.758105  | 2.116435  | -0.231580 |  |
|             | C  | -3.729980 | 0.101143  | 0.748139  |  |
|             | H  | -3.227177 | -0.557947 | 1.450116  |  |
|             | C  | -5.117288 | 0.062242  | 0.645356  |  |
|             | H  | -5.684103 | -0.624621 | 1.270138  |  |
|             | C  | -5.780936 | 0.892020  | -0.260801 |  |
|             | H  | -6.863155 | 0.852261  | -0.353682 |  |
|             | C  | -5.033170 | 1.760132  | -1.056632 |  |
|             | H  | -5.532399 | 2.403197  | -1.778284 |  |
|             | C  | -3.645463 | 1.810136  | -0.937177 |  |
|             | H  | -3.071444 | 2.478045  | -1.574442 |  |
|             | C  | -2.952533 | 0.990761  | -0.019707 |  |
|             | Si | -1.345868 | 3.755377  | 0.860098  |  |
|             | H  | -1.208141 | 4.922707  | -0.070219 |  |
|             | C  | -0.221099 | 4.092110  | 2.351894  |  |
|             | H  | -0.443063 | 3.381182  | 3.157304  |  |
|             | H  | -0.400929 | 5.101134  | 2.743286  |  |
|             | H  | 0.842453  | 4.005134  | 2.111994  |  |
|             | C  | -3.107327 | 3.804471  | 1.543477  |  |
|             | H  | -3.343311 | 2.913605  | 2.135001  |  |
|             | H  | -3.870592 | 3.897368  | 0.767381  |  |
|             | H  | -3.180699 | 4.677832  | 2.205069  |  |
|             | C  | 2.984737  | 0.996045  | -0.109202 |  |
|             | C  | 3.758463  | 0.043051  | -0.799227 |  |
|             | H  | 3.251802  | -0.701399 | -1.406405 |  |
|             | C  | 5.149140  | 0.049151  | -0.746105 |  |
|             | H  | 5.712189  | -0.691769 | -1.309475 |  |
|             | C  | 5.821747  | 0.995255  | 0.030019  |  |
|             | H  | 6.907444  | 0.993714  | 0.082007  |  |
|             | C  | 5.079529  | 1.930771  | 0.750241  |  |
|             | H  | 5.585957  | 2.664717  | 1.373281  |  |
|             | C  | 3.687751  | 1.929304  | 0.683352  |  |
|             | H  | 3.118971  | 2.644796  | 1.271034  |  |
|             | Si | 1.503876  | 3.616319  | -1.179782 |  |
|             | H  | 2.751704  | 3.114092  | -1.824916 |  |
|             | C  | 0.352278  | 4.091663  | -2.610878 |  |
|             | H  | 0.169468  | 3.235273  | -3.269526 |  |
|             | H  | 0.830122  | 4.874731  | -3.213677 |  |
|             | H  | -0.615420 | 4.473265  | -2.271529 |  |
|             | C  | 1.985775  | 5.201472  | -0.253671 |  |
|             | H  | 1.123822  | 5.717496  | 0.180406  |  |
|             | H  | 2.459568  | 5.885780  | -0.969752 |  |
|             | H  | 2.709310  | 5.009068  | 0.545877  |  |
|             | U  | 0.010280  | -1.030216 | 0.009435  |  |
| <b>TS7b</b> | C  | -1.870168 | -1.953015 | -1.978910 |  |
|             | C  | -2.048403 | -0.569953 | -2.265552 |  |
|             | C  | -0.801261 | -0.058850 | -2.752561 |  |
|             | C  | 0.131316  | -1.130972 | -2.780003 |  |
|             | C  | -0.512601 | -2.298713 | -2.276350 |  |
|             | C  | -2.998163 | -2.919246 | -1.763099 |  |
|             | H  | -2.648974 | -3.886593 | -1.394565 |  |
|             | H  | -3.518599 | -3.107926 | -2.713824 |  |
|             | H  | -3.749787 | -2.542397 | -1.062022 |  |
|             | C  | -3.390154 | 0.097558  | -2.360171 |  |
|             | H  | -3.906364 | -0.214895 | -3.280448 |  |
|             | H  | -3.312706 | 1.186311  | -2.381827 |  |
|             | H  | -4.048675 | -0.165117 | -1.525083 |  |



|    |           |           |           |
|----|-----------|-----------|-----------|
| C  | -0.564732 | 1.310324  | -3.329576 |
| H  | 0.121577  | 1.252719  | -4.183091 |
| H  | -0.127079 | 2.018852  | -2.615769 |
| H  | -1.498927 | 1.752886  | -3.691010 |
| C  | 1.491832  | -1.085876 | -3.405422 |
| H  | 1.949788  | -2.078537 | -3.411523 |
| H  | 2.182723  | -0.412498 | -2.890010 |
| H  | 1.422665  | -0.755556 | -4.451409 |
| C  | 0.053038  | -3.690297 | -2.295644 |
| H  | 1.118923  | -3.705651 | -2.049864 |
| H  | -0.063844 | -4.152665 | -3.286779 |
| H  | -0.451833 | -4.345657 | -1.578681 |
| C  | -1.429765 | -2.706416 | 1.743252  |
| C  | -2.316226 | -1.612602 | 1.991048  |
| C  | -1.579018 | -0.603698 | 2.674419  |
| C  | -0.236061 | -1.059377 | 2.834830  |
| C  | -0.149477 | -2.366677 | 2.271668  |
| C  | -1.812281 | -4.093990 | 1.314837  |
| H  | -1.085292 | -4.537962 | 0.625666  |
| H  | -2.790989 | -4.124064 | 0.830121  |
| H  | -1.865585 | -4.760276 | 2.188229  |
| C  | -3.806817 | -1.616496 | 1.790428  |
| H  | -4.185558 | -0.701391 | 1.319195  |
| H  | -4.332590 | -1.720916 | 2.750303  |
| H  | -4.125869 | -2.454213 | 1.163942  |
| C  | -2.170474 | 0.602290  | 3.345303  |
| H  | -3.239264 | 0.692641  | 3.127099  |
| H  | -1.691527 | 1.541732  | 3.052747  |
| H  | -2.078519 | 0.517156  | 4.437082  |
| C  | 0.824695  | -0.399823 | 3.668298  |
| H  | 1.820330  | -0.499925 | 3.222982  |
| H  | 0.870051  | -0.841887 | 4.674755  |
| H  | 0.631814  | 0.669550  | 3.796080  |
| C  | 0.974338  | -3.335722 | 2.476712  |
| H  | 0.776631  | -3.973846 | 3.351539  |
| H  | 1.918204  | -2.818318 | 2.660913  |
| H  | 1.124241  | -3.998236 | 1.618899  |
| C  | -1.324965 | 2.231957  | 0.279899  |
| C  | -0.184573 | 2.211676  | 0.774740  |
| C  | 2.037106  | 0.126567  | -0.161339 |
| C  | 2.054336  | -1.192943 | -0.022389 |
| C  | -3.807427 | 2.290569  | 0.380107  |
| H  | -3.792529 | 1.619877  | 1.231443  |
| C  | -5.013729 | 2.796816  | -0.091944 |
| H  | -5.942697 | 2.501547  | 0.388547  |
| C  | -5.034645 | 3.682268  | -1.170388 |
| H  | -5.979403 | 4.074037  | -1.537223 |
| C  | -3.834837 | 4.068790  | -1.770268 |
| H  | -3.841286 | 4.767054  | -2.603082 |
| C  | -2.623325 | 3.568201  | -1.305684 |
| H  | -1.689639 | 3.874128  | -1.766610 |
| C  | -2.594143 | 2.663160  | -0.224962 |
| Si | 1.088011  | 3.133370  | 1.780735  |
| H  | 2.125508  | 2.200070  | 2.276765  |
| C  | 0.197778  | 3.906721  | 3.256821  |
| H  | -0.628067 | 4.547830  | 2.928227  |
| H  | 0.905419  | 4.529911  | 3.818315  |
| H  | -0.206272 | 3.158514  | 3.946221  |
| C  | 1.835049  | 4.499623  | 0.726412  |
| H  | 2.356649  | 4.094979  | -0.144946 |
| H  | 2.556499  | 5.070584  | 1.323510  |
| H  | 1.057750  | 5.191572  | 0.381666  |
| C  | 3.101315  | 1.102638  | -0.399041 |

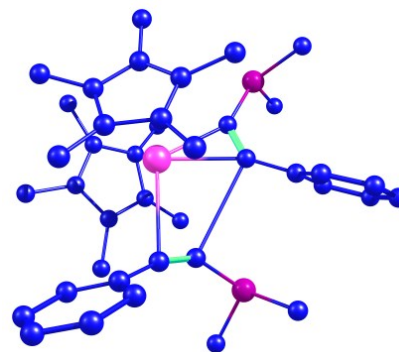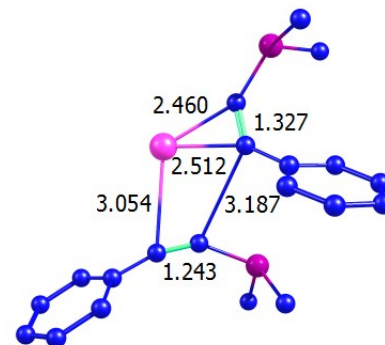

|             |                                                                                                                                                                                                                                                                                                                                                                                                                                                                                                                                                                                                                                                                                                                                                                                                                                                                                                                                                                                                                                                                                                                                                                                                                                                                                                                                                                                                                                                                       |  |
|-------------|-----------------------------------------------------------------------------------------------------------------------------------------------------------------------------------------------------------------------------------------------------------------------------------------------------------------------------------------------------------------------------------------------------------------------------------------------------------------------------------------------------------------------------------------------------------------------------------------------------------------------------------------------------------------------------------------------------------------------------------------------------------------------------------------------------------------------------------------------------------------------------------------------------------------------------------------------------------------------------------------------------------------------------------------------------------------------------------------------------------------------------------------------------------------------------------------------------------------------------------------------------------------------------------------------------------------------------------------------------------------------------------------------------------------------------------------------------------------------|--|
|             | C 3.097221 1.907789 -1.554088<br>H 2.260716 1.831764 -2.243513<br>C 4.149547 2.777073 -1.835714<br>H 4.128995 3.365930 -2.750283<br>C 5.219017 2.902519 -0.947676<br>H 6.034968 3.588271 -1.161284<br>C 5.222814 2.141129 0.222025<br>H 6.044942 2.233870 0.928579<br>C 4.185413 1.250469 0.489036<br>H 4.201128 0.658303 1.399729<br>Si 3.434536 -2.448513 -0.098018<br>H 2.848583 -3.826580 -0.177492<br>C 4.572225 -2.246488 -1.601589<br>H 4.053599 -2.420988 -2.549120<br>H 5.402015 -2.962116 -1.536349<br>H 4.997949 -1.237065 -1.632387<br>C 4.566923 -2.410456 1.426948<br>H 5.221940 -1.532495 1.387189<br>H 5.206126 -3.302551 1.438494<br>H 4.021226 -2.378269 2.375163<br>U -0.344146 -0.649566 0.029562                                                                                                                                                                                                                                                                                                                                                                                                                                                                                                                                                                                                                                                                                                                                                 |  |
| <b>TS7c</b> | C 0.240985 -3.206981 1.672222<br>C 1.261558 -2.314605 2.095819<br>C 0.634687 -1.214232 2.766294<br>C -0.769737 -1.438253 2.762220<br>C -1.020721 -2.657110 2.064397<br>C 0.466566 -4.621403 1.225909<br>H -0.420745 -5.049021 0.752831<br>H 0.707198 -5.256299 2.091749<br>H 1.301632 -4.716370 0.524122<br>C 2.728095 -2.633515 2.098763<br>H 2.980758 -3.285967 2.948150<br>H 3.343443 -1.735527 2.195783<br>H 3.047902 -3.156101 1.190519<br>C 1.360697 -0.119741 3.493543<br>H 0.703387 0.726109 3.710398<br>H 2.207409 0.268967 2.917099<br>H 1.759186 -0.480289 4.452912<br>C -1.800258 -0.622217 3.481840<br>H -2.740305 -0.563213 2.925160<br>H -1.461560 0.404686 3.641789<br>H -2.020824 -1.053383 4.469114<br>C -2.322422 -3.407311 2.026593<br>H -3.139423 -2.801430 2.427229<br>H -2.264704 -4.315186 2.643823<br>H -2.609390 -3.726211 1.017670<br>C -0.430077 -2.836410 -2.088557<br>C 0.924070 -2.413213 -2.255221<br>C 0.901132 -1.057371 -2.697076<br>C -0.459765 -0.639136 -2.792779<br>C -1.283772 -1.742173 -2.420987<br>C -0.911133 -4.248044 -1.915507<br>H -1.764132 -4.322788 -1.231288<br>H -0.125733 -4.910346 -1.543669<br>H -1.246445 -4.655331 -2.880507<br>C 2.138715 -3.296405 -2.200694<br>H 1.997092 -4.147282 -1.526976<br>H 3.031513 -2.759958 -1.861426<br>H 2.372752 -3.712301 -3.191848<br>C 2.085088 -0.302429 -3.226140<br>H 3.024679 -0.712134 -2.843347<br>H 2.063442 0.761388 -2.971140<br>H 2.128733 -0.376104 -4.322549 |  |

|            |    |           |           |           |                                                                                     |
|------------|----|-----------|-----------|-----------|-------------------------------------------------------------------------------------|
|            | C  | -0.960954 | 0.642499  | -3.394202 | 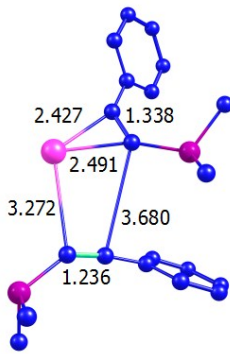 |
|            | H  | -1.690474 | 1.149947  | -2.752949 |                                                                                     |
|            | H  | -1.451095 | 0.458113  | -4.360654 |                                                                                     |
|            | H  | -0.139814 | 1.340395  | -3.585243 |                                                                                     |
|            | C  | -2.762652 | -1.847361 | -2.645468 |                                                                                     |
|            | H  | -2.966980 | -2.314698 | -3.621139 |                                                                                     |
|            | H  | -3.247489 | -0.868548 | -2.639639 |                                                                                     |
|            | H  | -3.260820 | -2.456183 | -1.884215 |                                                                                     |
|            | C  | 2.035164  | 2.008563  | -0.235923 |                                                                                     |
|            | C  | 2.604185  | 0.920125  | -0.100050 |                                                                                     |
|            | C  | -2.288161 | 0.160129  | 0.145276  |                                                                                     |
|            | C  | -1.452989 | 1.128811  | 0.539423  |                                                                                     |
|            | C  | 1.881300  | 4.323331  | 0.534815  |                                                                                     |
|            | H  | 2.401755  | 4.033896  | 1.442474  |                                                                                     |
|            | C  | 1.534205  | 5.651100  | 0.314696  |                                                                                     |
|            | H  | 1.779326  | 6.401611  | 1.061152  |                                                                                     |
|            | C  | 0.875809  | 6.018689  | -0.859917 |                                                                                     |
|            | H  | 0.604783  | 7.057506  | -1.028090 |                                                                                     |
|            | C  | 0.566922  | 5.052633  | -1.818817 |                                                                                     |
|            | H  | 0.054133  | 5.336701  | -2.733479 |                                                                                     |
|            | C  | 0.910142  | 3.722938  | -1.607773 |                                                                                     |
|            | H  | 0.666905  | 2.969114  | -2.347944 |                                                                                     |
|            | C  | 1.568748  | 3.341687  | -0.425312 |                                                                                     |
|            | Si | 4.295264  | 0.144564  | -0.098873 |                                                                                     |
|            | H  | 4.179083  | -1.320294 | -0.327892 |                                                                                     |
|            | C  | 5.134552  | 0.491195  | 1.553055  |                                                                                     |
|            | H  | 5.283534  | 1.569926  | 1.678297  |                                                                                     |
|            | H  | 6.120536  | 0.011035  | 1.574259  |                                                                                     |
|            | H  | 4.565720  | 0.129093  | 2.414343  |                                                                                     |
|            | C  | 5.322567  | 0.916411  | -1.477679 |                                                                                     |
|            | H  | 4.874593  | 0.766815  | -2.464433 |                                                                                     |
|            | H  | 6.325035  | 0.470850  | -1.487841 |                                                                                     |
|            | H  | 5.432910  | 1.994657  | -1.315569 |                                                                                     |
|            | C  | -3.730564 | 0.151905  | -0.114689 |                                                                                     |
|            | C  | -4.579539 | -0.866960 | 0.351589  |                                                                                     |
|            | H  | -4.154365 | -1.675620 | 0.936884  |                                                                                     |
|            | C  | -5.945127 | -0.857419 | 0.077298  |                                                                                     |
|            | H  | -6.576649 | -1.652721 | 0.467803  |                                                                                     |
|            | C  | -6.502514 | 0.154246  | -0.705882 |                                                                                     |
|            | H  | -7.565634 | 0.153223  | -0.933216 |                                                                                     |
|            | C  | -5.673710 | 1.161387  | -1.202588 |                                                                                     |
|            | H  | -6.089867 | 1.953538  | -1.821710 |                                                                                     |
|            | C  | -4.312776 | 1.163373  | -0.905808 |                                                                                     |
|            | H  | -3.675231 | 1.953479  | -1.295861 |                                                                                     |
|            | Si | -1.789272 | 2.822836  | 1.232322  |                                                                                     |
|            | H  | -1.525394 | 3.863233  | 0.184477  |                                                                                     |
|            | C  | -3.554234 | 3.112230  | 1.873092  |                                                                                     |
|            | H  | -4.304034 | 3.076555  | 1.077592  |                                                                                     |
|            | H  | -3.616095 | 4.093870  | 2.361253  |                                                                                     |
|            | H  | -3.827538 | 2.352694  | 2.615805  |                                                                                     |
|            | C  | -0.652398 | 3.212484  | 2.701886  |                                                                                     |
|            | H  | -1.000727 | 2.702381  | 3.608398  |                                                                                     |
|            | H  | -0.652005 | 4.289194  | 2.911723  |                                                                                     |
|            | H  | 0.379945  | 2.901699  | 2.516425  |                                                                                     |
|            | U  | -0.110088 | -0.903422 | 0.018861  |                                                                                     |
| <b>P7b</b> | C  | -2.127122 | -2.336836 | -2.131087 |                                                                                     |
|            | C  | -2.286215 | -0.938795 | -2.368726 |                                                                                     |
|            | C  | -1.026781 | -0.414147 | -2.781760 |                                                                                     |
|            | C  | -0.085958 | -1.488432 | -2.799003 |                                                                                     |
|            | C  | -0.762731 | -2.678022 | -2.391505 |                                                                                     |
|            | C  | -3.250181 | -3.303852 | -1.888895 |                                                                                     |
|            | H  | -2.892636 | -4.262531 | -1.502912 |                                                                                     |
|            | H  | -3.783445 | -3.513774 | -2.826981 |                                                                                     |

|    |           |           |           |
|----|-----------|-----------|-----------|
| H  | -3.995640 | -2.919026 | -1.183611 |
| C  | -3.592810 | -0.196980 | -2.347813 |
| H  | -4.100753 | -0.274300 | -3.320042 |
| H  | -3.460853 | 0.867214  | -2.131767 |
| H  | -4.283454 | -0.599994 | -1.598147 |
| C  | -0.774263 | 0.959731  | -3.326039 |
| H  | 0.227835  | 1.321940  | -3.073363 |
| H  | -1.492736 | 1.687844  | -2.940519 |
| H  | -0.856177 | 0.961915  | -4.422812 |
| C  | 1.283863  | -1.416871 | -3.402470 |
| H  | 1.936260  | -2.215493 | -3.038389 |
| H  | 1.773402  | -0.463039 | -3.185454 |
| H  | 1.227888  | -1.515052 | -4.496572 |
| C  | -0.187336 | -4.066006 | -2.421933 |
| H  | 0.877095  | -4.074554 | -2.164183 |
| H  | -0.278726 | -4.507306 | -3.424662 |
| H  | -0.700653 | -4.742880 | -1.730256 |
| C  | -1.689223 | -2.968285 | 1.824493  |
| C  | -2.407154 | -1.775903 | 2.150229  |
| C  | -1.483003 | -0.850822 | 2.718047  |
| C  | -0.192120 | -1.467689 | 2.738685  |
| C  | -0.324363 | -2.778664 | 2.198217  |
| C  | -2.300890 | -4.281193 | 1.427324  |
| H  | -1.644123 | -4.872969 | 0.779572  |
| H  | -3.253305 | -4.153046 | 0.905396  |
| H  | -2.501956 | -4.895448 | 2.316813  |
| C  | -3.901107 | -1.627212 | 2.091718  |
| H  | -4.216802 | -0.580872 | 2.032688  |
| H  | -4.371545 | -2.051507 | 2.990103  |
| H  | -4.336579 | -2.148182 | 1.231784  |
| C  | -1.800808 | 0.421132  | 3.450534  |
| H  | -2.858365 | 0.688382  | 3.373064  |
| H  | -1.213730 | 1.271306  | 3.088624  |
| H  | -1.577775 | 0.303060  | 4.520202  |
| C  | 1.001195  | -0.882763 | 3.432730  |
| H  | 1.907344  | -1.460961 | 3.238788  |
| H  | 0.845114  | -0.870272 | 4.521331  |
| H  | 1.196392  | 0.147633  | 3.117108  |
| C  | 0.728968  | -3.849239 | 2.170019  |
| H  | 0.679375  | -4.471691 | 3.074814  |
| H  | 1.738632  | -3.434020 | 2.116907  |
| H  | 0.610853  | -4.524144 | 1.314425  |
| C  | -0.640480 | 1.416424  | 0.110549  |
| C  | 0.630820  | 1.891875  | 0.320994  |
| C  | 1.815444  | 0.972243  | 0.156133  |
| C  | 1.737732  | -0.390302 | 0.038252  |
| C  | -3.037695 | 2.040721  | 0.588419  |
| H  | -3.121011 | 1.175617  | 1.238879  |
| C  | -4.138230 | 2.874581  | 0.415849  |
| H  | -5.069491 | 2.649251  | 0.930891  |
| C  | -4.054696 | 3.991144  | -0.418716 |
| H  | -4.917424 | 4.636198  | -0.563480 |
| C  | -2.854186 | 4.255155  | -1.078003 |
| H  | -2.776615 | 5.109439  | -1.746902 |
| C  | -1.748628 | 3.427725  | -0.888119 |
| H  | -0.826329 | 3.629331  | -1.425369 |
| C  | -1.801202 | 2.306663  | -0.031723 |
| Si | 0.974666  | 3.629165  | 1.073283  |
| H  | 2.109925  | 3.405412  | 2.022817  |
| C  | -0.430007 | 4.292009  | 2.157896  |
| H  | -1.285383 | 4.653512  | 1.580419  |
| H  | -0.035336 | 5.132034  | 2.744623  |
| H  | -0.793399 | 3.538496  | 2.864718  |

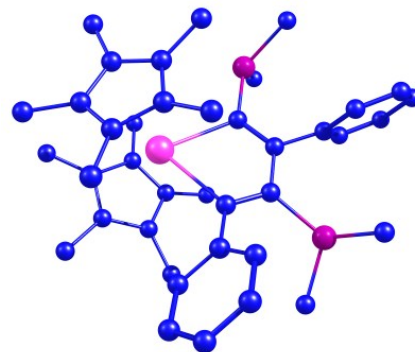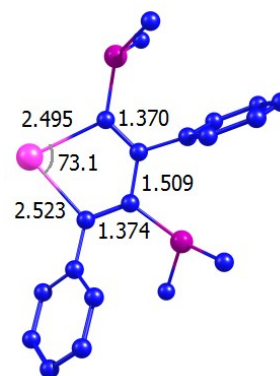

|    |           |           |           |
|----|-----------|-----------|-----------|
| C  | 1.507082  | 5.026901  | -0.092678 |
| H  | 2.373171  | 4.748983  | -0.700100 |
| H  | 1.784257  | 5.902863  | 0.507976  |
| H  | 0.694988  | 5.330164  | -0.763014 |
| C  | 3.149815  | 1.654198  | 0.018394  |
| C  | 3.478667  | 2.312861  | -1.175897 |
| H  | 2.742297  | 2.359155  | -1.975064 |
| C  | 4.737429  | 2.884177  | -1.359750 |
| H  | 4.974763  | 3.376085  | -2.300288 |
| C  | 5.690850  | 2.820407  | -0.343367 |
| H  | 6.672328  | 3.266298  | -0.483920 |
| C  | 5.372698  | 2.183463  | 0.856566  |
| H  | 6.104300  | 2.138853  | 1.659989  |
| C  | 4.115334  | 1.607376  | 1.033994  |
| H  | 3.868135  | 1.123695  | 1.975157  |
| Si | 3.201494  | -1.528507 | -0.236385 |
| H  | 2.592423  | -2.841530 | -0.663926 |
| C  | 4.466669  | -1.072680 | -1.577193 |
| H  | 4.001596  | -0.795667 | -2.527523 |
| H  | 5.121831  | -1.934479 | -1.759998 |
| H  | 5.092001  | -0.233885 | -1.253674 |
| C  | 4.238620  | -1.960476 | 1.297873  |
| H  | 4.863883  | -1.112388 | 1.597340  |
| H  | 4.906221  | -2.796931 | 1.054159  |
| H  | 3.639694  | -2.256617 | 2.164468  |
| U  | -0.652150 | -1.101985 | -0.041876 |

**Table S7.** Frequencies of the stationary points optimized for  $(\eta^5\text{-C}_5\text{Me}_5)_2\text{U}[\eta^2\text{-C}(\text{Ph})=\text{C}(\text{SiHMe}_2)]+\text{PhC}\equiv\text{CSiHMe}_2$ , obtained with B3PW91-PCM method.

| Species                                                                                         | Frequencies (cm <sup>-1</sup> ) |      |      |      |      |      |      |      |      |      |      |
|-------------------------------------------------------------------------------------------------|---------------------------------|------|------|------|------|------|------|------|------|------|------|
| $(\eta^5\text{-C}_5\text{Me}_5)_2\text{U}[\eta^2\text{-C}(\text{Ph})=\text{C}(\text{SiHMe}_2)]$ | 10                              | 18   | 22   | 31   | 41   | 46   | 59   | 63   | 74   | 87   |      |
|                                                                                                 | 95                              | 106  | 107  | 113  | 115  | 116  | 122  | 126  | 127  | 131  |      |
|                                                                                                 | 141                             | 145  | 149  | 152  | 156  | 158  | 159  | 165  | 167  | 171  |      |
|                                                                                                 | 173                             | 177  | 178  | 181  | 192  | 211  | 226  | 279  | 280  | 283  |      |
|                                                                                                 | 283                             | 286  | 288  | 289  | 293  | 294  | 296  | 302  | 324  | 371  |      |
|                                                                                                 | 382                             | 388  | 396  | 415  | 435  | 503  | 549  | 551  | 551  | 552  |      |
|                                                                                                 | 556                             | 557  | 568  | 602  | 603  | 613  | 623  | 628  | 631  | 632  |      |
|                                                                                                 | 634                             | 636  | 659  | 691  | 709  | 715  | 742  | 781  | 788  | 818  |      |
|                                                                                                 | 819                             | 822  | 824  | 859  | 868  | 882  | 903  | 911  | 932  | 973  |      |
|                                                                                                 | 974                             | 975  | 977  | 978  | 995  | 1012 | 1048 | 1051 | 1051 | 1052 |      |
|                                                                                                 | 1058                            | 1058 | 1059 | 1059 | 1060 | 1062 | 1065 | 1093 | 1093 | 1095 |      |
|                                                                                                 | 1095                            | 1107 | 1130 | 1130 | 1185 | 1191 | 1194 | 1195 | 1196 | 1199 |      |
|                                                                                                 | 1222                            | 1303 | 1310 | 1329 | 1371 | 1422 | 1423 | 1424 | 1426 | 1433 |      |
|                                                                                                 | 1434                            | 1436 | 1436 | 1437 | 1440 | 1446 | 1448 | 1452 | 1453 | 1469 |      |
|                                                                                                 | 1473                            | 1481 | 1481 | 1485 | 1486 | 1488 | 1489 | 1492 | 1493 | 1494 |      |
|                                                                                                 | 1499                            | 1500 | 1502 | 1502 | 1508 | 1508 | 1509 | 1511 | 1512 | 1513 |      |
|                                                                                                 | 1522                            | 1522 | 1527 | 1529 | 1530 | 1533 | 1534 | 1542 | 1544 | 1549 |      |
|                                                                                                 | 1551                            | 1604 | 1634 | 1660 | 2136 | 3034 | 3034 | 3036 | 3037 | 3037 |      |
|                                                                                                 | 3038                            | 3038 | 3039 | 3040 | 3041 | 3049 | 3051 | 3094 | 3097 | 3098 |      |
|                                                                                                 | 3099                            | 3099 | 3100 | 3100 | 3107 | 3114 | 3117 | 3128 | 3129 | 3130 |      |
|                                                                                                 | 3130                            | 3131 | 3133 | 3134 | 3135 | 3136 | 3139 | 3143 | 3145 | 3149 |      |
|                                                                                                 | 3150                            | 3185 | 3191 | 3201 | 3211 | 3218 |      |      |      |      |      |
|                                                                                                 | PhC≡CSiHMe <sub>2</sub>         | 10   | 50   | 58   | 133  | 147  | 151  | 167  | 202  | 284  | 294  |
|                                                                                                 |                                 | 346  | 409  | 411  | 544  | 565  | 606  | 630  | 633  | 668  | 704  |
|                                                                                                 |                                 | 711  | 758  | 774  | 793  | 845  | 858  | 880  | 910  | 912  | 934  |
|                                                                                                 |                                 | 976  | 1004 | 1015 | 1060 | 1112 | 1191 | 1209 | 1264 | 1313 | 1320 |
| 1339                                                                                            |                                 | 1374 | 1477 | 1479 | 1483 | 1489 | 1490 | 1540 | 1637 | 1669 |      |
| 2213                                                                                            |                                 | 2265 | 3058 | 3058 | 3141 | 3142 | 3149 | 3150 | 3200 | 3209 |      |
| 3219                                                                                            |                                 | 3227 | 3231 |      |      |      |      |      |      |      |      |
|                                                                                                 |                                 |      |      |      |      |      |      |      |      |      |      |
| TS7                                                                                             | -59                             | 21   | 30   | 36   | 36   | 43   | 48   | 51   | 53   | 61   |      |
|                                                                                                 | 62                              | 68   | 71   | 78   | 79   | 82   | 87   | 88   | 93   | 103  |      |
|                                                                                                 | 107                             | 111  | 115  | 125  | 127  | 130  | 133  | 138  | 141  | 144  |      |
|                                                                                                 | 145                             | 149  | 151  | 152  | 155  | 157  | 158  | 162  | 165  | 168  |      |
|                                                                                                 | 169                             | 176  | 177  | 181  | 182  | 185  | 189  | 196  | 217  | 223  |      |
|                                                                                                 | 243                             | 267  | 271  | 273  | 278  | 280  | 280  | 282  | 286  | 290  |      |
|                                                                                                 | 291                             | 293  | 314  | 326  | 357  | 370  | 373  | 382  | 386  | 387  |      |
|                                                                                                 | 401                             | 405  | 410  | 428  | 526  | 544  | 547  | 547  | 549  | 550  |      |
|                                                                                                 | 551                             | 552  | 556  | 560  | 591  | 609  | 610  | 612  | 623  | 628  |      |
|                                                                                                 | 630                             | 632  | 632  | 634  | 639  | 644  | 651  | 670  | 684  | 697  |      |
|                                                                                                 | 704                             | 709  | 722  | 764  | 766  | 771  | 780  | 787  | 791  | 819  |      |
|                                                                                                 | 821                             | 822  | 826  | 838  | 850  | 853  | 856  | 878  | 879  | 910  |      |
|                                                                                                 | 912                             | 916  | 923  | 925  | 934  | 962  | 970  | 971  | 973  | 974  |      |
|                                                                                                 | 981                             | 982  | 1001 | 1009 | 1015 | 1048 | 1049 | 1050 | 1051 | 1056 |      |
|                                                                                                 | 1057                            | 1059 | 1059 | 1060 | 1060 | 1061 | 1062 | 1091 | 1094 | 1094 |      |
|                                                                                                 | 1097                            | 1105 | 1115 | 1128 | 1132 | 1184 | 1193 | 1193 | 1195 | 1196 |      |
|                                                                                                 | 1197                            | 1202 | 1209 | 1216 | 1253 | 1303 | 1311 | 1313 | 1320 | 1328 |      |
|                                                                                                 | 1342                            | 1371 | 1378 | 1419 | 1420 | 1422 | 1424 | 1428 | 1430 | 1432 |      |
|                                                                                                 | 1434                            | 1434 | 1439 | 1450 | 1451 | 1453 | 1453 | 1474 | 1474 | 1475 |      |
|                                                                                                 | 1478                            | 1480 | 1480 | 1481 | 1484 | 1487 | 1489 | 1490 | 1490 | 1490 |      |
|                                                                                                 | 1492                            | 1494 | 1495 | 1496 | 1500 | 1503 | 1505 | 1506 | 1508 | 1509 |      |
|                                                                                                 | 1510                            | 1514 | 1518 | 1521 | 1524 | 1525 | 1528 | 1529 | 1531 | 1533 |      |
|                                                                                                 | 1537                            | 1540 | 1544 | 1552 | 1553 | 1615 | 1629 | 1637 | 1660 | 1666 |      |
| 2164                                                                                            | 2173                            | 2251 | 3029 | 3032 | 3033 | 3034 | 3034 | 3035 | 3036 |      |      |
| 3038                                                                                            | 3039                            | 3040 | 3049 | 3053 | 3059 | 3060 | 3100 | 3102 | 3103 |      |      |
| 3105                                                                                            | 3107                            | 3108 | 3109 | 3114 | 3117 | 3122 | 3128 | 3134 | 3138 |      |      |
| 3139                                                                                            | 3140                            | 3143 | 3146 | 3147 | 3149 | 3149 | 3151 | 3153 | 3156 |      |      |
| 3159                                                                                            | 3160                            | 3161 | 3162 | 3165 | 3181 | 3188 | 3204 | 3207 | 3214 |      |      |

|             | 3216 | 3220 | 3223 | 3229 | 3238 |      |      |      |      |      |
|-------------|------|------|------|------|------|------|------|------|------|------|
| <b>7</b>    | 23   | 27   | 33   | 34   | 45   | 54   | 62   | 65   | 68   | 74   |
|             | 78   | 79   | 84   | 90   | 91   | 94   | 95   | 99   | 103  | 108  |
|             | 108  | 110  | 117  | 118  | 121  | 127  | 132  | 134  | 140  | 142  |
|             | 144  | 148  | 150  | 154  | 158  | 159  | 163  | 169  | 172  | 174  |
|             | 180  | 183  | 185  | 186  | 195  | 200  | 203  | 214  | 249  | 250  |
|             | 264  | 277  | 279  | 281  | 285  | 285  | 286  | 288  | 289  | 293  |
|             | 296  | 296  | 297  | 340  | 353  | 372  | 373  | 389  | 401  | 412  |
|             | 416  | 441  | 481  | 545  | 548  | 549  | 550  | 552  | 555  | 556  |
|             | 567  | 584  | 606  | 607  | 621  | 621  | 625  | 627  | 630  | 631  |
|             | 633  | 640  | 642  | 643  | 655  | 680  | 682  | 707  | 715  | 719  |
|             | 741  | 742  | 774  | 776  | 777  | 778  | 797  | 807  | 815  | 819  |
|             | 820  | 825  | 826  | 859  | 864  | 867  | 875  | 917  | 917  | 926  |
|             | 928  | 933  | 940  | 954  | 971  | 972  | 973  | 974  | 977  | 978  |
|             | 993  | 994  | 1014 | 1015 | 1039 | 1046 | 1047 | 1052 | 1054 | 1055 |
|             | 1056 | 1058 | 1060 | 1062 | 1062 | 1063 | 1072 | 1093 | 1095 | 1095 |
|             | 1096 | 1108 | 1109 | 1130 | 1131 | 1187 | 1187 | 1191 | 1192 | 1196 |
|             | 1198 | 1208 | 1209 | 1236 | 1267 | 1300 | 1301 | 1309 | 1310 | 1334 |
|             | 1337 | 1369 | 1371 | 1421 | 1421 | 1423 | 1424 | 1431 | 1432 | 1435 |
|             | 1435 | 1437 | 1440 | 1448 | 1448 | 1452 | 1454 | 1471 | 1471 | 1478 |
|             | 1478 | 1480 | 1481 | 1485 | 1485 | 1486 | 1487 | 1488 | 1488 | 1490 |
|             | 1492 | 1493 | 1494 | 1495 | 1501 | 1502 | 1505 | 1505 | 1506 | 1506 |
|             | 1509 | 1510 | 1512 | 1517 | 1521 | 1523 | 1526 | 1527 | 1530 | 1533 |
|             | 1535 | 1541 | 1541 | 1543 | 1549 | 1550 | 1563 | 1641 | 1641 | 1666 |
|             | 1666 | 2132 | 2134 | 3036 | 3037 | 3039 | 3039 | 3040 | 3040 | 3040 |
|             | 3041 | 3042 | 3043 | 3054 | 3055 | 3056 | 3059 | 3099 | 3103 | 3103 |
|             | 3103 | 3106 | 3110 | 3111 | 3114 | 3115 | 3116 | 3132 | 3134 | 3135 |
| 3137        | 3137 | 3139 | 3148 | 3153 | 3154 | 3155 | 3156 | 3157 | 3161 |      |
| 3161        | 3161 | 3161 | 3167 | 3168 | 3188 | 3189 | 3194 | 3195 | 3205 |      |
| 3206        | 3210 | 3211 | 3220 | 3220 |      |      |      |      |      |      |
| <b>TS7a</b> | -29  | 21   | 29   | 30   | 40   | 41   | 46   | 52   | 55   | 60   |
|             | 63   | 71   | 74   | 79   | 80   | 86   | 89   | 92   | 94   | 101  |
|             | 107  | 108  | 116  | 118  | 129  | 130  | 137  | 144  | 146  | 147  |
|             | 150  | 152  | 163  | 167  | 170  | 173  | 176  | 177  | 181  | 186  |
|             | 189  | 193  | 194  | 197  | 199  | 203  | 210  | 213  | 217  | 225  |
|             | 229  | 239  | 260  | 265  | 272  | 274  | 276  | 279  | 281  | 283  |
|             | 287  | 296  | 300  | 306  | 335  | 353  | 367  | 372  | 375  | 385  |
|             | 411  | 418  | 420  | 430  | 499  | 508  | 538  | 546  | 548  | 549  |
|             | 550  | 552  | 555  | 563  | 600  | 609  | 610  | 613  | 620  | 621  |
|             | 626  | 626  | 631  | 632  | 634  | 643  | 652  | 672  | 685  | 703  |
|             | 710  | 714  | 716  | 751  | 752  | 767  | 777  | 785  | 788  | 818  |
|             | 821  | 823  | 825  | 827  | 851  | 856  | 862  | 875  | 879  | 886  |
|             | 903  | 909  | 915  | 927  | 929  | 966  | 966  | 975  | 977  | 978  |
|             | 980  | 992  | 1003 | 1012 | 1014 | 1044 | 1047 | 1048 | 1050 | 1055 |
|             | 1056 | 1057 | 1058 | 1058 | 1060 | 1060 | 1061 | 1090 | 1092 | 1093 |
|             | 1095 | 1107 | 1113 | 1127 | 1128 | 1185 | 1191 | 1191 | 1192 | 1195 |
|             | 1195 | 1200 | 1208 | 1215 | 1235 | 1306 | 1308 | 1312 | 1314 | 1330 |
|             | 1338 | 1371 | 1374 | 1417 | 1420 | 1422 | 1423 | 1425 | 1429 | 1431 |
|             | 1435 | 1436 | 1439 | 1449 | 1450 | 1453 | 1453 | 1473 | 1475 | 1475 |
|             | 1477 | 1480 | 1481 | 1483 | 1483 | 1484 | 1486 | 1488 | 1490 | 1491 |
|             | 1491 | 1492 | 1494 | 1497 | 1504 | 1505 | 1506 | 1508 | 1509 | 1510 |
|             | 1513 | 1515 | 1518 | 1519 | 1522 | 1526 | 1529 | 1529 | 1531 | 1533 |
|             | 1534 | 1540 | 1544 | 1549 | 1552 | 1631 | 1633 | 1659 | 1660 | 1667 |
|             | 2085 | 2168 | 2249 | 3027 | 3030 | 3032 | 3034 | 3036 | 3037 | 3037 |
|             | 3038 | 3039 | 3041 | 3052 | 3054 | 3055 | 3066 | 3088 | 3097 | 3097 |
|             | 3104 | 3105 | 3105 | 3113 | 3114 | 3119 | 3120 | 3127 | 3130 | 3135 |
| 3137        | 3141 | 3149 | 3150 | 3150 | 3155 | 3157 | 3158 | 3160 | 3161 |      |
| 3164        | 3165 | 3167 | 3168 | 3180 | 3187 | 3195 | 3203 | 3206 | 3211 |      |
| 3217        | 3223 | 3230 | 3237 | 3261 |      |      |      |      |      |      |
| <b>P7a</b>  | 14   | 28   | 35   | 38   | 51   | 52   | 57   | 58   | 64   | 71   |
|             | 75   | 77   | 81   | 90   | 94   | 94   | 98   | 103  | 106  | 110  |
|             | 116  | 121  | 122  | 125  | 127  | 129  | 132  | 133  | 135  | 141  |
|             | 144  | 145  | 151  | 153  | 160  | 163  | 166  | 172  | 174  | 180  |

|             |      |      |      |      |      |      |      |      |      |      |
|-------------|------|------|------|------|------|------|------|------|------|------|
|             | 184  | 186  | 191  | 192  | 194  | 208  | 212  | 221  | 228  | 253  |
|             | 260  | 263  | 267  | 272  | 275  | 281  | 282  | 284  | 287  | 288  |
|             | 291  | 293  | 297  | 366  | 372  | 381  | 386  | 390  | 421  | 424  |
|             | 430  | 451  | 492  | 501  | 545  | 547  | 550  | 551  | 551  | 552  |
|             | 554  | 559  | 604  | 605  | 606  | 616  | 618  | 619  | 627  | 630  |
|             | 630  | 634  | 638  | 641  | 645  | 662  | 682  | 693  | 694  | 713  |
|             | 716  | 738  | 749  | 759  | 776  | 781  | 788  | 792  | 815  | 817  |
|             | 823  | 825  | 854  | 859  | 864  | 870  | 872  | 901  | 906  | 912  |
|             | 917  | 920  | 922  | 958  | 968  | 970  | 971  | 973  | 975  | 976  |
|             | 991  | 994  | 1010 | 1011 | 1046 | 1046 | 1050 | 1051 | 1055 | 1056 |
|             | 1056 | 1057 | 1061 | 1062 | 1062 | 1063 | 1068 | 1091 | 1092 | 1092 |
|             | 1093 | 1110 | 1113 | 1128 | 1129 | 1185 | 1185 | 1188 | 1190 | 1194 |
|             | 1194 | 1206 | 1208 | 1237 | 1238 | 1304 | 1307 | 1313 | 1317 | 1329 |
|             | 1330 | 1370 | 1370 | 1418 | 1420 | 1422 | 1423 | 1431 | 1434 | 1434 |
|             | 1435 | 1436 | 1440 | 1445 | 1446 | 1452 | 1453 | 1467 | 1469 | 1475 |
|             | 1478 | 1480 | 1480 | 1481 | 1484 | 1485 | 1486 | 1487 | 1488 | 1488 |
|             | 1489 | 1490 | 1493 | 1495 | 1498 | 1501 | 1503 | 1503 | 1503 | 1504 |
|             | 1506 | 1509 | 1511 | 1513 | 1514 | 1515 | 1517 | 1527 | 1529 | 1531 |
|             | 1533 | 1534 | 1538 | 1540 | 1543 | 1550 | 1551 | 1628 | 1628 | 1658 |
|             | 1659 | 2180 | 2216 | 3034 | 3036 | 3039 | 3039 | 3040 | 3040 | 3043 |
|             | 3043 | 3046 | 3046 | 3054 | 3054 | 3056 | 3056 | 3101 | 3102 | 3102 |
|             | 3103 | 3104 | 3106 | 3113 | 3113 | 3117 | 3120 | 3128 | 3132 | 3133 |
|             | 3137 | 3139 | 3141 | 3141 | 3144 | 3147 | 3149 | 3152 | 3152 | 3156 |
|             | 3157 | 3159 | 3160 | 3163 | 3174 | 3188 | 3189 | 3194 | 3195 | 3209 |
|             | 3212 | 3217 | 3219 | 3226 | 3228 |      |      |      |      |      |
| <b>TS7b</b> | -17  | 16   | 28   | 31   | 38   | 42   | 43   | 49   | 50   | 63   |
|             | 69   | 73   | 74   | 81   | 83   | 87   | 88   | 93   | 102  | 105  |
|             | 107  | 110  | 119  | 122  | 125  | 128  | 136  | 141  | 143  | 147  |
|             | 148  | 152  | 154  | 157  | 157  | 162  | 164  | 167  | 170  | 174  |
|             | 176  | 181  | 184  | 184  | 189  | 193  | 195  | 203  | 225  | 245  |
|             | 250  | 261  | 266  | 268  | 274  | 279  | 280  | 284  | 287  | 292  |
|             | 296  | 301  | 304  | 335  | 352  | 364  | 369  | 376  | 382  | 388  |
|             | 400  | 412  | 418  | 427  | 507  | 519  | 543  | 548  | 549  | 551  |
|             | 553  | 555  | 557  | 559  | 588  | 609  | 610  | 614  | 623  | 626  |
|             | 629  | 632  | 632  | 633  | 638  | 638  | 642  | 665  | 687  | 703  |
|             | 703  | 708  | 717  | 736  | 767  | 770  | 779  | 785  | 787  | 818  |
|             | 820  | 826  | 829  | 830  | 846  | 858  | 862  | 873  | 878  | 895  |
|             | 909  | 910  | 919  | 924  | 932  | 968  | 974  | 975  | 978  | 979  |
|             | 981  | 992  | 1003 | 1010 | 1014 | 1048 | 1048 | 1053 | 1054 | 1054 |
|             | 1057 | 1058 | 1060 | 1061 | 1061 | 1065 | 1074 | 1090 | 1092 | 1093 |
|             | 1096 | 1106 | 1115 | 1126 | 1128 | 1185 | 1191 | 1192 | 1192 | 1194 |
|             | 1195 | 1199 | 1212 | 1216 | 1239 | 1303 | 1308 | 1311 | 1317 | 1328 |
|             | 1341 | 1369 | 1375 | 1419 | 1421 | 1423 | 1424 | 1429 | 1431 | 1432 |
|             | 1432 | 1437 | 1441 | 1449 | 1450 | 1452 | 1453 | 1472 | 1473 | 1473 |
|             | 1479 | 1480 | 1481 | 1483 | 1484 | 1487 | 1487 | 1488 | 1492 | 1493 |
|             | 1493 | 1494 | 1497 | 1498 | 1503 | 1503 | 1505 | 1508 | 1512 | 1513 |
|             | 1514 | 1517 | 1520 | 1521 | 1525 | 1527 | 1528 | 1531 | 1532 | 1533 |
|             | 1536 | 1544 | 1546 | 1550 | 1552 | 1630 | 1633 | 1658 | 1658 | 1664 |
|             | 2105 | 2173 | 2285 | 3030 | 3031 | 3032 | 3035 | 3036 | 3037 | 3039 |
|             | 3045 | 3046 | 3050 | 3053 | 3054 | 3056 | 3058 | 3094 | 3105 | 3107 |
|             | 3108 | 3109 | 3110 | 3111 | 3113 | 3119 | 3124 | 3131 | 3133 | 3133 |
|             | 3135 | 3138 | 3143 | 3144 | 3146 | 3147 | 3150 | 3154 | 3156 | 3156 |
|             | 3159 | 3165 | 3170 | 3170 | 3171 | 3187 | 3193 | 3204 | 3210 | 3212 |
|             | 3216 | 3221 | 3225 | 3235 | 3248 |      |      |      |      |      |
| <b>TS7c</b> | -66  | 20   | 29   | 32   | 37   | 39   | 47   | 48   | 55   | 60   |
|             | 63   | 63   | 71   | 77   | 80   | 83   | 85   | 91   | 94   | 101  |
|             | 111  | 119  | 120  | 126  | 128  | 132  | 135  | 138  | 143  | 146  |
|             | 147  | 148  | 152  | 156  | 160  | 169  | 170  | 172  | 177  | 180  |
|             | 183  | 185  | 188  | 192  | 195  | 200  | 203  | 209  | 221  | 232  |
|             | 235  | 263  | 264  | 269  | 272  | 273  | 277  | 281  | 282  | 286  |
|             | 290  | 299  | 307  | 317  | 339  | 363  | 372  | 375  | 376  | 385  |
|             | 407  | 411  | 418  | 430  | 510  | 543  | 547  | 548  | 550  | 551  |
|             | 555  | 556  | 556  | 567  | 607  | 610  | 613  | 618  | 619  | 623  |



|            |      |      |      |      |      |      |      |      |      |      |
|------------|------|------|------|------|------|------|------|------|------|------|
|            | 627  | 627  | 632  | 633  | 635  | 644  | 655  | 673  | 681  | 699  |
|            | 703  | 711  | 715  | 750  | 769  | 773  | 778  | 783  | 789  | 821  |
|            | 823  | 824  | 825  | 837  | 854  | 859  | 863  | 872  | 876  | 894  |
|            | 910  | 912  | 921  | 923  | 939  | 967  | 970  | 970  | 976  | 978  |
|            | 983  | 990  | 1007 | 1011 | 1016 | 1049 | 1050 | 1053 | 1053 | 1056 |
|            | 1058 | 1059 | 1060 | 1060 | 1061 | 1063 | 1066 | 1092 | 1094 | 1095 |
|            | 1096 | 1107 | 1116 | 1129 | 1130 | 1184 | 1193 | 1193 | 1193 | 1195 |
|            | 1197 | 1200 | 1211 | 1216 | 1250 | 1298 | 1307 | 1313 | 1321 | 1330 |
|            | 1342 | 1370 | 1378 | 1420 | 1421 | 1424 | 1424 | 1430 | 1431 | 1433 |
|            | 1435 | 1435 | 1440 | 1448 | 1450 | 1453 | 1455 | 1472 | 1473 | 1476 |
|            | 1477 | 1478 | 1481 | 1483 | 1484 | 1485 | 1488 | 1489 | 1489 | 1491 |
|            | 1491 | 1493 | 1493 | 1497 | 1503 | 1506 | 1506 | 1508 | 1508 | 1510 |
|            | 1514 | 1515 | 1516 | 1518 | 1522 | 1527 | 1528 | 1529 | 1532 | 1535 |
|            | 1537 | 1542 | 1545 | 1551 | 1555 | 1622 | 1632 | 1637 | 1659 | 1665 |
|            | 2156 | 2176 | 2253 | 3026 | 3031 | 3033 | 3034 | 3037 | 3038 | 3038 |
|            | 3039 | 3040 | 3041 | 3048 | 3053 | 3059 | 3060 | 3099 | 3101 | 3104 |
|            | 3104 | 3105 | 3106 | 3109 | 3111 | 3115 | 3120 | 3123 | 3126 | 3138 |
|            | 3140 | 3140 | 3141 | 3148 | 3148 | 3155 | 3156 | 3157 | 3158 | 3159 |
|            | 3160 | 3161 | 3162 | 3162 | 3165 | 3184 | 3191 | 3202 | 3205 | 3215 |
|            | 3215 | 3225 | 3233 | 3238 | 3250 |      |      |      |      |      |
| <b>P7b</b> | 15   | 25   | 30   | 36   | 39   | 50   | 56   | 61   | 65   | 67   |
|            | 72   | 75   | 75   | 80   | 86   | 91   | 96   | 98   | 104  | 105  |
|            | 108  | 112  | 115  | 122  | 125  | 129  | 132  | 139  | 143  | 148  |
|            | 150  | 151  | 154  | 158  | 161  | 163  | 166  | 173  | 176  | 181  |
|            | 185  | 188  | 190  | 193  | 197  | 210  | 213  | 223  | 235  | 252  |
|            | 260  | 262  | 270  | 279  | 281  | 283  | 287  | 288  | 292  | 293  |
|            | 295  | 297  | 303  | 336  | 369  | 375  | 387  | 393  | 406  | 415  |
|            | 426  | 449  | 468  | 519  | 548  | 550  | 551  | 552  | 553  | 556  |
|            | 556  | 586  | 605  | 606  | 615  | 620  | 626  | 627  | 628  | 630  |
|            | 631  | 637  | 641  | 642  | 658  | 678  | 681  | 693  | 707  | 715  |
|            | 719  | 731  | 764  | 774  | 779  | 786  | 791  | 808  | 818  | 820  |
|            | 822  | 825  | 841  | 862  | 863  | 873  | 874  | 903  | 914  | 915  |
|            | 924  | 929  | 931  | 962  | 970  | 972  | 974  | 974  | 977  | 980  |
|            | 994  | 995  | 1012 | 1014 | 1047 | 1048 | 1049 | 1053 | 1054 | 1054 |
|            | 1057 | 1057 | 1058 | 1062 | 1064 | 1068 | 1075 | 1090 | 1092 | 1095 |
|            | 1097 | 1106 | 1111 | 1127 | 1132 | 1186 | 1187 | 1190 | 1193 | 1194 |
|            | 1197 | 1206 | 1212 | 1228 | 1265 | 1301 | 1304 | 1309 | 1314 | 1334 |
|            | 1334 | 1369 | 1371 | 1418 | 1421 | 1423 | 1424 | 1431 | 1432 | 1433 |
|            | 1435 | 1436 | 1439 | 1448 | 1449 | 1453 | 1454 | 1471 | 1471 | 1478 |
|            | 1480 | 1481 | 1482 | 1483 | 1485 | 1486 | 1487 | 1489 | 1489 | 1489 |
|            | 1491 | 1493 | 1494 | 1494 | 1498 | 1500 | 1501 | 1503 | 1504 | 1506 |
|            | 1508 | 1509 | 1511 | 1512 | 1519 | 1525 | 1527 | 1528 | 1529 | 1530 |
|            | 1533 | 1537 | 1538 | 1543 | 1549 | 1550 | 1552 | 1628 | 1639 | 1659 |
|            | 1664 | 2126 | 2193 | 3037 | 3037 | 3038 | 3038 | 3039 | 3039 | 3041 |
|            | 3042 | 3042 | 3045 | 3054 | 3055 | 3056 | 3056 | 3101 | 3101 | 3102 |
|            | 3102 | 3104 | 3105 | 3111 | 3112 | 3115 | 3116 | 3132 | 3133 | 3134 |
|            | 3135 | 3137 | 3139 | 3148 | 3149 | 3151 | 3152 | 3153 | 3154 | 3155 |
|            | 3156 | 3162 | 3162 | 3166 | 3166 | 3188 | 3190 | 3195 | 3196 | 3205 |
|            | 3213 | 3214 | 3220 | 3221 | 3225 |      |      |      |      |      |

**Table S8.** The energies, enthalpies and free energies (in au at 298.15 K) and corresponding relative values (in kcal/mol) for  $(\eta^5\text{-C}_5\text{Me}_5)_2\text{U}[\eta^2\text{-C(Ph)=C(SiHMe}_2)]+\text{PhC}\equiv\text{CSiHMe}_2$ , obtained with B3PW91-PCM method. <sup>a</sup>

| Species                                                                                                    | E                   | H                   | G(sol)              |
|------------------------------------------------------------------------------------------------------------|---------------------|---------------------|---------------------|
| $(\eta^5\text{-C}_5\text{Me}_5)_2\text{U}[\eta^2\text{-C(Ph)=C(SiHMe}_2)]$                                 | -1494.436371        | -1494.394293        | -1494.489590        |
| $\text{PhC}\equiv\text{CSiHMe}_2$                                                                          | -677.374363         | -677.360999         | -677.399020         |
| $(\eta^5\text{-C}_5\text{Me}_5)_2\text{U}[\eta^2\text{-C(Ph)=C(SiHMe}_2)]+\text{PhC}\equiv\text{CSiHMe}_2$ | -2171.810734(0.0)   | -2171.755292(0.0)   | -2171.888610(0.0)   |
| <b>TS7</b>                                                                                                 | -2171.789522(13.3)  | -2171.734585(13.0)  | -2171.853810(21.8)  |
| <b>7</b>                                                                                                   | -2171.843723(-20.7) | -2171.789259(-21.3) | -2171.907400(-11.8) |
| <b>TS7a</b>                                                                                                | -2171.782767(17.5)  | -2171.728041(17.1)  | -2171.846310(26.5)  |
| <b>P7a</b>                                                                                                 | -2171.829591(-11.8) | -2171.775095(-12.4) | -2171.893080(-2.8)  |
| <b>TS7b</b>                                                                                                | -2171.787738(14.4)  | -2171.732997(14.0)  | -2171.851280(23.4)  |
| <b>TS7c</b>                                                                                                | -2171.785341(15.9)  | -2171.73061(15.5)   | -2171.849190(24.7)  |
| <b>P7b</b>                                                                                                 | -2171.839336(-17.9) | -2171.784842(-18.5) | -2171.903220(-9.2)  |

<sup>a</sup> The U was treated with ECP80MWB, in which 80 electrons are in the core region and the corresponding optimized segmented ((7s6p5d)/[4s3p3d]) basis set is applied for the valence shells of U.

**Table S9.** The energies, enthalpies and free energies (in au at 298.15 K) and corresponding relative values (in kcal/mol) for  $(\eta^5\text{-C}_5\text{Me}_5)_2\text{U}[\eta^2\text{-C(Ph)=C(SiHMe}_2)]+\text{PhC}\equiv\text{CSiHMe}_2$ , obtained with B3PW91-PCM method. <sup>a</sup>

| Species                                                                                                    | E                   | H                   | G(sol)             |
|------------------------------------------------------------------------------------------------------------|---------------------|---------------------|--------------------|
| $(\eta^5\text{-C}_5\text{Me}_5)_2\text{U}[\eta^2\text{-C(Ph)=C(SiHMe}_2)]$                                 | -1933.992864        | -1933.950572        | -1934.047250       |
| $\text{PhC}\equiv\text{CSiHMe}_2$                                                                          | -677.374363         | -677.360999         | -677.399020        |
| $(\eta^5\text{-C}_5\text{Me}_5)_2\text{U}[\eta^2\text{-C(Ph)=C(SiHMe}_2)]+\text{PhC}\equiv\text{CSiHMe}_2$ | -2611.367227(0.0)   | -2611.311571(0.0)   | -2611.446270(0.0)  |
| <b>TS7</b>                                                                                                 | -2611.339297(17.5)  | -2611.284442(17.0)  | -2611.404600(26.1) |
| <b>7</b>                                                                                                   | -2611.385622(-11.5) | -2611.331040(-12.2) | -2611.450230(-2.5) |
| <b>TS7a</b>                                                                                                | -2611.329681(23.6)  | -2611.275179(22.8)  | -2611.393690(33.0) |
| <b>P7a</b>                                                                                                 | -2611.373646(-4.0)  | -2611.319125(-4.7)  | -2611.438360(5.0)  |
| <b>TS7b</b>                                                                                                | -2611.335459(19.9)  | -2611.281022(19.2)  | -2611.399710(29.2) |
| <b>TS7c</b>                                                                                                | -2611.337044(18.9)  | -2611.282382(18.3)  | -2611.402030(27.8) |
| <b>P7b</b>                                                                                                 | -2611.381400(-8.9)  | -2611.327201(-9.8)  | -2611.445400(0.5)  |

<sup>a</sup> The U was treated with ECP60MWB, in which 60 electrons are in the core region and the corresponding optimized segmented ((14s13p10d8f6g)/[10s9p5d4f3g]) basis set is applied for the valence shells of U.
